# Supplementary material for: NOLC1 suppresses immunochemotherapy by inhibiting p53-mediated ferroptosis in gastric cancer
Source: eLife. 2025 Aug 27;13:RP103904. doi: 10.7554/eLife.103904 (PMC12387760; doi:10.7554/eLife.103904)
Supplement: Source data 1. [file elife-103904-data1.xlsx]

## Sheet: Sheet1
# This file is generated by MACS version 2.2.7.1
# Command line: callpeak -t ../../Mapping/P53_IP/P53_IP.final.bam -c ../../Mapping/P53_Input/P53_Input.final.bam -g 3099750718 -f AUTO -n P53 -B -q 0.05 --call-summits --nomodel --extsize 191
# ARGUMENTS LIST:
# name = P53
# format = AUTO
# ChIP-seq file = ['../../Mapping/P53_IP/P53_IP.final.bam']
# control file = ['../../Mapping/P53_Input/P53_Input.final.bam']
# effective genome size = 3.10e+09
# band width = 300
# model fold = [5, 50]
# qvalue cutoff = 5.00e-02
# The maximum gap between significant sites is assigned as the read length/tag size.
# The minimum length of peaks is assigned as the predicted fragment length "d".
# Larger dataset will be scaled towards smaller dataset.
# Range for calculating regional lambda is: 1000 bps and 10000 bps
# Broad region calling is off
# Paired-End mode is off
# Searching for subpeak summits is on
# tag size is determined as 134 bps
# total tags in treatment: 18914043
# tags after filtering in treatment: 18625435
# maximum duplicate tags at the same position in treatment = 1
# Redundant rate in treatment: 0.02
# total tags in control: 18638252
# tags after filtering in control: 18363106
# maximum duplicate tags at the same position in control = 1
# Redundant rate in control: 0.01
# d = 191
chr	start	end	length	abs_summit	pileup	#NAME?	fold_enrichment	#NAME?	name
1	979952	980275	324	980015	9.86	5.31807	4.29555	1.55389	P53_peak_1
1	999915	1000115	201	1000088	13.8	10.5752	6.89786	6.19105	P53_peak_2
1	1306611	1306837	227	1306741	14.79	11.7714	7.40735	7.3015	P53_peak_3
1	7704943	7705146	204	7704998	11.83	6.96717	4.99999	2.93328	P53_peak_4
1	8006420	8006610	191	8006561	11.83	7.37908	5.27481	3.30981	P53_peak_5
1	9182000	9182338	339	9182156	20.7	17.372	9.13785	12.5639	P53_peak_6
1	11262720	11262927	208	11262827	13.8	7.67179	5.02097	3.54619	P53_peak_7
1	12618411	12618603	193	12618503	13.8	9.71493	6.33411	5.39499	P53_peak_8
1	16513816	16514153	338	16513908	11.83	6.39451	4.62161	2.45993	P53_peak_9
1	16545882	16546082	201	16545983	23.66	17.4005	8.22066	12.586	P53_peak_10
1	16896142	16896336	195	16896254	22.68	13.826	6.51193	9.21914	P53_peak_11
1	26620750	26621020	271	26620924	13.8	7.62015	4.98865	3.50294	P53_peak_12
1	27322028	27322218	191	27322132	17.75	6.60524	3.7493	2.61757	P53_peak_13
1	27636766	27636987	222	27636883	17.75	11.5315	6.44209	7.07933	P53_peak_14
1	28373481	28373671	191	28373616	13.8	8.97996	5.85555	4.73085	P53_peak_15
1	44799786	44800158	373	44799957	11.83	7.97693	5.67592	3.82985	P53_peak_16
1	53838176	53838558	383	53838463	16.76	11.1808	6.48646	6.75353	P53_peak_17
1	58783811	58784178	368	58784167	8.87	5.35917	4.5203	1.5911	P53_peak_18
1	66400764	66400988	225	66400857	13.8	7.53305	4.93427	3.42297	P53_peak_19
1	66542832	66543022	191	66542971	16.76	9.92876	5.72737	5.5949	P53_peak_20
1	67686610	67686947	338	67686804	35.49	31.5779	12.1643	26.2044	P53_peak_21
1	67725249	67725489	241	67725373	22.68	16.3197	7.89202	11.5653	P53_peak_22
1	69055290	69055513	224	69055400	15.77	9.31879	5.59155	5.03463	P53_peak_23
1	72000850	72001171	322	72001035	17.75	15.3054	8.79499	10.605	P53_peak_24
1	74160107	74160311	205	74160221	15.77	9.31879	5.59155	5.03463	P53_peak_25
1	80217607	80217847	241	80217725	18.73	12.1886	6.57747	7.68512	P53_peak_26
1	81874490	81874820	331	81874638	66.06	58.6085	14.4861	52.5998	P53_peak_27
1	82226234	82226426	193	82226391	19.72	6.46191	3.45305	2.49234	P53_peak_28
1	88801939	88802210	272	88802093	25.63	19.0999	8.58878	14.1981	P53_peak_29
1	93078974	93079329	356	93079177	19.72	12.8045	6.68117	8.26658	P53_peak_30
1	93847514	93847715	202	93847589	10.85	5.08049	3.94836	1.35493	P53_peak_31
1	99943439	99943635	197	99943525	18.73	9.25272	4.9331	4.98355	P53_peak_32
1	111214482	111214831	350	111214681	19.72	14.9423	7.95512	10.2698	P53_peak_33
1	115839249	115839515	267	115839382	24.65	21.616	10.3808	16.5939	P53_peak_34
1	115877548	115877750	203	115877656	19.72	13.8769	7.31166	9.26809	P53_peak_35
1	116879206	116879452	247	116879328	19.72	13.2445	6.93755	8.66827	P53_peak_36
1	120176467	120176674	208	120176560	23.66	11.0053	4.93239	6.58509	P53_peak_37
1	125174004	125174210	207	125174108	55.21	19.5271	4.32394	14.6053	P53_peak_38
1	125178894	125179402	509	125179012	208.03	48.9117	3.37142	43.1123	P53_peak_39a
1	125178894	125179402	509	125179268	139.01	33.9484	3.40584	28.5097	P53_peak_39b
1	125180007	125180571	565	125180227	342.11	31.7002	2.03025	26.3249	P53_peak_40
1	125181503	125181837	335	125181631	131.13	29.7936	3.2226	24.4761	P53_peak_41
1	125182311	125182730	420	125182548	194.23	45.6239	3.36595	39.8999	P53_peak_42
1	125183613	125183843	231	125183724	174.51	38.1753	3.19104	32.6325	P53_peak_43
1	143185092	143185330	239	143185198	126.2	31.3202	3.43776	25.957	P53_peak_44
1	143192992	143193208	217	143193094	82.82	45.4961	7.53546	39.7766	P53_peak_45
1	143194988	143195253	266	143195114	106.48	41.4756	5.11804	35.8483	P53_peak_46
1	143202579	143202889	311	143202744	98.59	54.2872	7.66089	48.3827	P53_peak_47
1	143213061	143213358	298	143213224	237.61	57.1006	3.45805	51.1232	P53_peak_48
1	143214525	143214862	338	143214746	255.35	60.4007	3.41803	54.361	P53_peak_49
1	143215634	143215913	280	143215781	47.32	12.7961	3.38081	8.25986	P53_peak_50
1	143217258	143217494	237	143217376	199.15	44.1662	3.22831	38.4771	P53_peak_51
1	143219682	143219969	288	143219839	50.28	17.7542	4.27347	12.9207	P53_peak_52
1	143220237	143220430	194	143220330	41.41	8.92154	2.82723	4.67619	P53_peak_53
1	143222097	143222331	235	143222212	84.79	22.5572	3.57453	17.494	P53_peak_54
1	143231358	143231570	213	143231458	88.73	34.0001	4.98513	28.5608	P53_peak_55
1	143232764	143233253	490	143232918	103.52	22.2561	3.07415	17.2061	P53_peak_56
1	143239435	143239874	440	143239608	50.28	7.65652	2.33099	3.5363	P53_peak_57a
1	143239435	143239874	440	143239718	44.37	5.97459	2.1603	2.08341	P53_peak_57b
1	143245551	143245927	377	143245829	23.66	6.41011	3.08275	2.47237	P53_peak_58
1	143247125	143247383	259	143247236	16.76	10.8248	6.26784	6.42109	P53_peak_59
1	143252992	143253218	227	143253102	143.94	39.8646	3.81431	34.2775	P53_peak_60
1	143255538	143255729	192	143255644	92.68	25.9992	3.74704	20.8001	P53_peak_61
1	143264539	143264751	213	143264654	193.24	33.3827	2.73577	27.9641	P53_peak_62
1	143266733	143267400	668	143266812	29.58	8.88513	3.46251	4.64272	P53_peak_63a
1	143266733	143267400	668	143267135	39.44	7.96785	2.69577	3.8219	P53_peak_63b
1	144412611	144413037	427	144412722	10.85	7.33318	5.47091	3.26602	P53_peak_64
1	144567289	144567662	374	144567347	9.86	6.16789	4.88623	2.25651	P53_peak_65
1	145287669	145287870	202	145287757	15.77	9.31879	5.59155	5.03463	P53_peak_66
1	146376894	146377130	237	146377010	26.62	11.2515	4.60329	6.81393	P53_peak_67
1	148522661	148522947	287	148522738	13.8	7.27405	4.77356	3.21212	P53_peak_68
1	148528768	148529379	612	148529248	21.69	15.2573	7.56338	10.564	P53_peak_69
1	149390433	149390623	191	149390544	11.83	7.13865	5.11419	3.08856	P53_peak_70
1	149886620	149886812	193	149886716	12.82	6.44544	4.45563	2.49234	P53_peak_71
1	150579502	150579725	224	150579557	11.83	5.0276	3.74551	1.32372	P53_peak_72
1	153671170	153671377	208	153671269	25.63	19.0999	8.58878	14.1981	P53_peak_73
1	154196974	154197171	198	154197088	18.73	11.7567	6.32428	7.29316	P53_peak_74
1	154391272	154391577	306	154391416	27.61	17.3804	7.15141	12.5695	P53_peak_75
1	155244623	155244909	287	155244816	16.76	10.2513	5.92019	5.88925	P53_peak_76
1	159925736	159925979	244	159925852	14.79	8.41215	5.26291	4.22034	P53_peak_77
1	161422062	161422294	233	161422158	20.7	7.09102	3.61737	3.04366	P53_peak_78
1	161428017	161428257	241	161428119	16.76	8.38146	4.83412	4.20324	P53_peak_79
1	161453998	161454288	291	161454144	33.52	14.5376	4.93159	9.88154	P53_peak_80
1	161523795	161523985	191	161523894	17.75	11.2084	6.24883	6.773	P53_peak_81
1	161612453	161612792	340	161612763	13.8	6.41151	4.25002	2.47237	P53_peak_82
1	167714717	167714918	202	167714795	16.76	9.92876	5.72737	5.5949	P53_peak_83
1	174238894	174239133	240	174238995	11.83	8.48863	6.01971	4.27378	P53_peak_84
1	179882595	179882864	270	179882709	21.69	15.66	7.7973	10.94	P53_peak_85
1	180516099	180516304	206	180516207	17.75	6.60524	3.7493	2.61757	P53_peak_86
1	181134978	181135345	368	181135122	17.75	11.6023	6.48465	7.14609	P53_peak_87
1	182761420	182761718	299	182761554	28.59	18.3673	7.39789	13.5051	P53_peak_88
1	182869372	182869612	241	182869479	16.76	11.0359	6.39721	6.61394	P53_peak_89
1	183471924	183472114	191	183472043	12.82	6.6833	4.60563	2.67831	P53_peak_90
1	184051632	184051852	221	184051716	15.77	9.30194	5.58132	5.02819	P53_peak_91
1	186927925	186928157	233	186928037	17.75	8.44714	4.68662	4.2474	P53_peak_92
1	203303560	203303750	191	203303658	21.69	13.3903	6.51454	8.80618	P53_peak_93
1	204506863	204507177	315	204507098	16.76	10.2513	5.92019	5.88925	P53_peak_94
1	204524891	204525250	360	204525060	24.65	14.5125	6.41197	9.85771	P53_peak_95
1	205122207	205122397	191	205122299	22.68	8.40735	3.94601	4.22034	P53_peak_96
1	206482672	206482929	258	206482779	14.79	6.17368	3.94718	2.25719	P53_peak_97
1	207240754	207240946	193	207240873	21.69	15.2334	7.54954	10.5461	P53_peak_98
1	211258749	211259304	556	211259014	9.86	5.13595	4.16954	1.4047	P53_peak_99
1	211577235	211577566	332	211577401	14.79	8.67575	5.42568	4.45123	P53_peak_100
1	212596360	212596647	288	212596519	37.46	12.253	3.84648	7.74663	P53_peak_101
1	212608270	212608872	603	212608430	22.68	13.3263	6.24929	8.74596	P53_peak_102a
1	212608270	212608872	603	212608775	12.82	5.21501	3.70297	1.47666	P53_peak_102b
1	214439509	214439816	308	214439655	31.55	15.1537	5.42488	10.4704	P53_peak_103
1	225653655	225653992	338	225653880	13.8	6.69448	4.41967	2.68927	P53_peak_104
1	226272562	226272826	265	226272684	30.56	20.0078	7.70929	15.063	P53_peak_105
1	227787908	227788165	258	227788027	19.72	12.3237	6.40502	7.81334	P53_peak_106
1	228487104	228487308	205	228487199	16.76	9.47268	5.45841	5.17892	P53_peak_107
1	230066687	230066898	212	230066775	14.79	7.4148	4.66088	3.341	P53_peak_108
1	233179706	233179930	225	233179810	22.68	14.3592	6.79761	9.71312	P53_peak_109
1	234608164	234608482	319	234608382	17.75	9.76733	5.41196	5.4453	P53_peak_110
1	234618426	234618807	382	234618584	31.55	21.1804	8.02497	16.1792	P53_peak_111
1	234700192	234700446	255	234700305	25.63	12.1477	5.11992	7.65108	P53_peak_112
1	235675079	235675304	226	235675189	29.58	18.4415	7.19978	13.5764	P53_peak_113
1	236097160	236097384	225	236097282	31.55	8.65647	3.25493	4.43476	P53_peak_114
1	239706595	239706958	364	239706791	22.68	18.6966	9.2953	13.8171	P53_peak_115
1	244239507	244239703	197	244239614	22.68	13.3263	6.24929	8.74596	P53_peak_116
1	244735413	244735795	383	244735590	33.52	29.1733	11.5594	23.8761	P53_peak_117
1	244862900	244863304	405	244863034	21.69	13.7255	6.6982	9.12442	P53_peak_118
1	244970463	244970726	264	244970567	19.72	11.812	6.11611	7.33545	P53_peak_119
1	244971261	244971485	225	244971352	14.79	7.68904	4.82408	3.56248	P53_peak_120
1	245142376	245142588	213	245142470	10.85	7.45972	5.55717	3.36425	P53_peak_121
10	378546	378929	384	378777	29.58	16.0393	6.11549	11.3019	P53_peak_122
10	1054837	1055055	219	1054946	19.72	15.436	8.25793	10.7283	P53_peak_123
10	7302514	7302709	196	7302608	15.77	9.31879	5.59155	5.03463	P53_peak_124
10	9553295	9553492	198	9553384	13.8	7.53305	4.93427	3.42297	P53_peak_125
10	11758085	11758313	229	11758204	14.79	10.0492	6.29309	5.70767	P53_peak_126
10	22229397	22229589	193	22229520	17.75	11.2084	6.24883	6.773	P53_peak_127
10	28327585	28327816	232	28327686	26.62	18.4108	7.92986	13.5467	P53_peak_128
10	28971338	28971578	241	28971456	19.72	13.1909	6.9061	8.61665	P53_peak_129
10	29444245	29444442	198	29444344	17.75	10.8646	6.0453	6.45782	P53_peak_130
10	38919751	38920246	496	38919955	16.76	5.94584	3.55211	2.05528	P53_peak_131
10	39835128	39835320	193	39835269	11.83	5.86499	4.277	1.98411	P53_peak_132
10	41851743	41851933	191	41851839	34.51	15.306	5.07243	10.605	P53_peak_133
10	41859705	41860084	380	41859805	86.76	15.0784	2.65941	10.4007	P53_peak_134
10	41870492	41870857	366	41870795	22.68	8.40735	3.94601	4.22034	P53_peak_135
10	41883100	41883521	422	41883194	69.01	8.35895	2.12164	4.1816	P53_peak_136a
10	41883100	41883521	422	41883471	67.04	5.88689	1.83898	2.00273	P53_peak_136b
10	41896168	41896366	199	41896272	30.56	9.27005	3.50704	4.99925	P53_peak_137
10	41899511	41899892	382	41899812	49.3	7.90452	2.39504	3.76186	P53_peak_138
10	41903347	41903554	208	41903519	43.38	8.20393	2.61061	4.03798	P53_peak_139
10	41904054	41904343	290	41904220	36.48	12.194	3.90608	7.69033	P53_peak_140
10	41910730	41910976	247	41910846	60.14	17.0741	3.59652	12.279	P53_peak_141
10	41914571	41914804	234	41914679	66.06	11.5603	2.57909	7.10744	P53_peak_142
10	42070467	42070719	253	42070560	56.2	8.76167	2.38322	4.52644	P53_peak_143
10	42079668	42079945	278	42079761	38.45	8.34325	2.81791	4.16721	P53_peak_144
10	45438394	45438706	313	45438556	22.68	21.0642	10.7457	16.0679	P53_peak_145
10	60760800	60761047	248	60760931	14.79	8.41215	5.26291	4.22034	P53_peak_146
10	67764414	67764749	336	67764529	12.82	8.01451	5.46555	3.86067	P53_peak_147
10	73424555	73424772	218	73424657	17.75	13.3017	7.52931	8.72288	P53_peak_148
10	75397289	75397479	191	75397455	11.83	8.42803	5.97902	4.23344	P53_peak_149
10	75402848	75403056	209	75402959	11.83	8.42803	5.97902	4.23344	P53_peak_150
10	83983680	83983936	257	83983802	17.75	11.5315	6.44209	7.07933	P53_peak_151
10	87863432	87863663	232	87863525	16.76	13.4622	7.92352	8.8749	P53_peak_152
10	89645184	89645432	249	89645315	13.8	9.87578	6.43937	5.5459	P53_peak_153
10	100286038	100286238	201	100286143	12.82	6.6833	4.60563	2.67831	P53_peak_154
10	100656451	100656690	240	100656544	10.85	7.33318	5.47091	3.26602	P53_peak_155
10	100731070	100731318	249	100731185	13.8	8.107	5.29542	3.94885	P53_peak_156
10	123445465	123445692	228	123445578	17.75	14.6252	8.36336	9.96574	P53_peak_157
10	125633683	125633909	227	125633767	8.87	5.51676	4.63207	1.68745	P53_peak_158
10	132763628	132763902	275	132763777	15.77	9.31879	5.59155	5.03463	P53_peak_159
10	133688307	133688522	216	133688418	61.13	27.9208	5.68302	22.6601	P53_peak_160
10	133690227	133690422	196	133690314	40.42	9.33966	2.95875	5.05453	P53_peak_161
10	133776168	133776417	250	133776288	22.68	21.649	11.1077	16.6224	P53_peak_162
11	435368	435798	431	435626	32.54	35.4684	15.6268	29.9902	P53_peak_163
11	765378	765637	260	765561	10.85	7.05992	5.28444	3.01825	P53_peak_164
11	804296	804526	231	804400	18.73	9.25272	4.9331	4.98355	P53_peak_165
11	1114919	1115141	223	1115066	12.82	6.6833	4.60563	2.67831	P53_peak_166
11	1830770	1831003	234	1830874	26.62	23.4314	10.7629	18.3307	P53_peak_167
11	4094539	4094901	363	4094790	14.79	11.7714	7.40735	7.3015	P53_peak_168
11	10899564	10899796	233	10899653	14.79	10.5994	6.64733	6.21455	P53_peak_169
11	33045846	33046165	320	33046013	19.72	13.1909	6.9061	8.61665	P53_peak_170
11	43880487	43880857	371	43880846	11.83	8.27235	5.87446	4.10211	P53_peak_171
11	47214810	47215113	304	47214959	20.7	17.254	9.06496	12.4515	P53_peak_172
11	59550498	59550779	282	59550658	10.85	7.45972	5.55717	3.36425	P53_peak_173
11	59551098	59551384	287	59551193	8.87	5.51676	4.63207	1.68745	P53_peak_174
11	62599956	62600209	254	62600075	18.73	15.2393	8.44347	10.5503	P53_peak_175
11	62841455	62841959	505	62841607	17.75	12.2769	6.89462	7.76848	P53_peak_176a
11	62841455	62841959	505	62841911	14.79	9.28491	5.80682	5.01182	P53_peak_176b
11	65421115	65421587	473	65421323	20.7	19.0502	10.1826	14.1509	P53_peak_177
11	65422073	65422339	267	65422249	9.86	6.46796	5.09462	2.49234	P53_peak_178
11	65422616	65422974	359	65422759	15.77	12.9238	7.8699	8.37263	P53_peak_179
11	65497417	65497876	460	65497663	12.82	7.4259	5.08161	3.34925	P53_peak_180
11	65498922	65499147	226	65499032	16.76	12.9541	7.59973	8.39888	P53_peak_181
11	68198316	68198634	319	68198461	26.62	21.4689	9.61756	16.4533	P53_peak_182
11	71802823	71803027	205	71802917	15.77	11.6676	7.06242	7.20871	P53_peak_183
11	74135262	74135506	245	74135375	21.69	17.6339	8.97553	12.8084	P53_peak_184
11	92843544	92843779	236	92843654	16.76	13.8999	8.20312	9.28987	P53_peak_185
11	102223883	102224090	208	102223985	25.63	19.6141	8.87793	14.6852	P53_peak_186
11	102256303	102256550	248	102256447	33.52	31.1955	12.6963	25.837	P53_peak_187
11	112961267	112961611	345	112961434	14.79	8.41215	5.26291	4.22034	P53_peak_188
11	133939869	133940062	194	133939950	10.85	7.4046	5.5196	3.33093	P53_peak_189
12	3299952	3300210	259	3300106	22.68	10.2238	4.73521	5.87041	P53_peak_190
12	6938044	6938245	202	6938135	13.8	10.3912	6.77723	6.01985	P53_peak_191
12	6943810	6944000	191	6943904	10.85	6.18093	4.68555	2.25947	P53_peak_192
12	10361204	10361436	233	10361328	17.75	12.6847	7.1456	8.15331	P53_peak_193
12	13099727	13100072	346	13099947	18.73	15.0226	8.30768	10.3469	P53_peak_194
12	15535398	15535588	191	15535499	13.8	7.53305	4.93427	3.42297	P53_peak_195
12	15936685	15937039	355	15936898	48.31	54.4122	19.5055	48.5047	P53_peak_196
12	19096962	19097186	225	19097059	14.79	11.5944	7.29238	7.1384	P53_peak_197
12	19401010	19401200	191	19401106	13.8	10.3017	6.71848	5.93473	P53_peak_198
12	19431871	19432176	306	19432014	18.73	15.4628	8.58378	10.7516	P53_peak_199
12	38890262	38890523	262	38890400	28.59	18.3673	7.39789	13.5051	P53_peak_200
12	47304279	47304471	193	47304366	10.85	7.12645	5.32986	3.07685	P53_peak_201
12	47556399	47556615	217	47556487	16.76	7.66459	4.44014	3.53922	P53_peak_202
12	50349286	50349487	202	50349381	18.73	12.1886	6.57747	7.68512	P53_peak_203
12	50928466	50928666	201	50928575	20.7	13.8065	6.9991	9.20034	P53_peak_204
12	52176085	52176306	222	52176182	17.75	8.44714	4.68662	4.2474	P53_peak_205
12	54280793	54280992	200	54280804	11.83	6.91158	4.96306	2.88099	P53_peak_206
12	56041951	56042180	230	56042041	16.76	11.4049	6.6251	6.96063	P53_peak_207
12	56117892	56118122	231	56118065	15.77	10.2568	6.16942	5.89276	P53_peak_208
12	57096203	57096425	223	57096294	16.76	7.66459	4.44014	3.53922	P53_peak_209
12	57522276	57522490	215	57522378	18.73	15.1301	8.37502	10.4491	P53_peak_210
12	64634829	64635042	214	64634951	20.7	8.71601	4.34085	4.4832	P53_peak_211
12	68042252	68042442	191	68042357	15.77	9.18633	5.51127	4.92658	P53_peak_212
12	68808802	68809149	348	68808968	41.41	39.3523	14.1362	33.7769	P53_peak_213
12	77065984	77066239	256	77066104	15.77	12.9238	7.8699	8.37263	P53_peak_214
12	80778137	80778361	225	80778254	20.7	15.4789	7.98243	10.7666	P53_peak_215
12	88559756	88560077	322	88559879	25.63	12.6201	5.32676	8.09542	P53_peak_216
12	91119239	91119510	272	91119386	17.75	15.3054	8.79499	10.605	P53_peak_217
12	92341361	92341569	209	92341469	16.76	10.2513	5.92019	5.88925	P53_peak_218
12	92784556	92784779	224	92784670	14.79	9.97494	6.24554	5.63681	P53_peak_219
12	98503412	98503604	193	98503505	14.79	9.28491	5.80682	5.01182	P53_peak_220
12	98644472	98644842	371	98644613	16.76	12.9541	7.59973	8.39888	P53_peak_221
12	103523816	103524104	289	103523972	18.73	16.5319	9.25754	11.7626	P53_peak_222
12	107380285	107380475	191	107380389	11.83	7.31765	5.23372	3.25214	P53_peak_223
12	110742987	110743210	224	110743081	12.82	7.82958	5.34441	3.69061	P53_peak_224
12	112409401	112409639	239	112409529	21.69	17.7462	9.04386	12.9136	P53_peak_225
12	120291611	120292347	737	120291725	13.8	7.53305	4.93427	3.42297	P53_peak_226
12	120446160	120446468	309	120446274	13.8	7.53305	4.93427	3.42297	P53_peak_227
12	122946877	122947083	207	122946972	24.65	21.098	10.0694	16.1006	P53_peak_228
12	124938657	124938872	216	124938754	25.63	15.4524	6.65845	10.742	P53_peak_229
12	124939677	124940088	412	124939923	12.82	8.01451	5.46555	3.86067	P53_peak_230
12	132265915	132266261	347	132266082	24.65	18.4988	8.5493	13.6275	P53_peak_231
13	18211761	18212216	456	18211869	106.48	22.8231	3.07083	17.7492	P53_peak_232a
13	18211761	18212216	456	18212089	127.18	23.3328	2.78659	18.2357	P53_peak_232b
13	23325397	23325587	191	23325510	14.79	8.41215	5.26291	4.22034	P53_peak_233
13	24875030	24875220	191	24875137	12.82	9.55182	6.48226	5.24245	P53_peak_234
13	40233705	40233895	191	40233803	17.75	14.0851	8.0216	9.46466	P53_peak_235
13	50529398	50529600	203	50529516	18.73	16.4327	9.19497	11.6711	P53_peak_236
13	64072234	64072523	290	64072301	10.85	5.08049	3.94836	1.35493	P53_peak_237
13	65052560	65052767	208	65052664	12.82	6.10998	4.24639	2.20315	P53_peak_238
13	67377565	67377869	305	67377704	40.42	28.1101	8.94849	22.8431	P53_peak_239
13	72754151	72754394	244	72754280	35.49	25.3055	8.95511	20.1319	P53_peak_240
13	73513845	73514090	246	73513959	28.59	11.7046	4.52539	7.24314	P53_peak_241
13	75571856	75572121	266	75571991	33.52	16.81	5.75352	12.0265	P53_peak_242
13	80341367	80341602	236	80341497	17.75	11.1892	6.23739	6.76026	P53_peak_243
13	83941710	83942118	409	83941887	25.63	24.1962	11.586	19.0644	P53_peak_244
13	86000648	86000859	212	86000749	21.69	16.5876	8.34503	11.8139	P53_peak_245
13	89167583	89167821	239	89167791	11.83	5.86499	4.277	1.98411	P53_peak_246
13	90591940	90592130	191	90592032	15.77	9.01743	5.40943	4.76548	P53_peak_247
13	93217653	93217906	254	93217783	19.72	11.9995	6.22134	7.51321	P53_peak_248
13	108754037	108754299	263	108754171	14.79	11.7714	7.40735	7.3015	P53_peak_249
14	20454864	20455054	191	20454975	11.83	5.86499	4.277	1.98411	P53_peak_250
14	20609271	20609814	544	20609613	19.72	16.4157	8.86535	11.6559	P53_peak_251
14	20609979	20610253	275	20610152	13.8	9.95816	6.49332	5.62319	P53_peak_252
14	20681585	20681801	217	20681679	13.8	8.34068	5.44421	4.16526	P53_peak_253
14	20683817	20684148	332	20683924	10.85	7.12645	5.32986	3.07685	P53_peak_254
14	20751976	20752277	302	20752098	14.79	8.41215	5.26291	4.22034	P53_peak_255
14	22536999	22537193	195	22537130	18.73	12.1886	6.57747	7.68512	P53_peak_256
14	22871509	22871784	276	22871633	13.8	7.53305	4.93427	3.42297	P53_peak_257
14	34843210	34843559	350	34843374	26.62	20.7457	9.20657	15.7613	P53_peak_258
14	35375822	35376012	191	35375916	16.76	10.2513	5.92019	5.88925	P53_peak_259
14	37448254	37448513	260	37448371	19.72	13.1909	6.9061	8.61665	P53_peak_260
14	39188196	39188428	233	39188309	17.75	11.2084	6.24883	6.773	P53_peak_261
14	49586424	49586940	517	49586690	19.72	7.99138	4.14366	3.84243	P53_peak_262
14	59483849	59484167	319	59483939	8.87	5.51676	4.63207	1.68745	P53_peak_263
14	65005551	65005741	191	65005654	13.8	7.53305	4.93427	3.42297	P53_peak_264
14	66503607	66503797	191	66503701	13.8	9.48287	6.18252	5.188	P53_peak_265
14	81220730	81220942	213	81220804	9.86	6.35399	5.01554	2.42033	P53_peak_266
14	91509318	91509694	377	91509546	14.79	8.41215	5.26291	4.22034	P53_peak_267
14	93937625	93937972	348	93937689	9.86	6.04918	4.80366	2.14842	P53_peak_268
14	99332466	99332855	390	99332700	30.56	31.1327	13.8454	25.7768	P53_peak_269
14	99333074	99333465	392	99333282	28.59	23.0554	9.86385	17.9655	P53_peak_270
14	102086916	102087184	269	102086992	9.86	5.46173	4.39517	1.68167	P53_peak_271
14	102316917	102317212	296	102317071	18.73	13.3225	7.25723	8.74234	P53_peak_272
14	103518590	103518905	316	103518670	10.85	7.4046	5.5196	3.33093	P53_peak_273
14	103521074	103521354	281	103521217	15.77	11.8478	7.17786	7.36677	P53_peak_274
14	103521786	103521998	213	103521929	10.85	6.86698	5.15272	2.84556	P53_peak_275
14	104816050	104816284	235	104816108	14.79	10.7675	6.75598	6.36527	P53_peak_276
14	105568232	105568581	350	105568386	15.77	9.31879	5.59155	5.03463	P53_peak_277
14	105687722	105688062	341	105687879	16.76	10.2513	5.92019	5.88925	P53_peak_278
15	18380667	18380882	216	18380773	16.76	14.1023	8.33244	9.4757	P53_peak_279
15	19500796	19501058	263	19500947	33.52	23.5121	8.63028	18.4069	P53_peak_280
15	20340749	20341698	950	20341085	25.63	12.6201	5.32676	8.09542	P53_peak_281a
15	20340749	20341698	950	20341575	18.73	7.59394	4.09386	3.4789	P53_peak_281b
15	20341894	20342215	322	20342164	18.73	9.12302	4.86499	4.86503	P53_peak_282
15	42575157	42575378	222	42575284	12.82	9.48572	6.43845	5.18837	P53_peak_283
15	44645660	44645957	298	44645800	20.7	19.0502	10.1826	14.1509	P53_peak_284
15	45198648	45198881	234	45198757	11.83	8.42803	5.97902	4.23344	P53_peak_285
15	56887190	56887402	213	56887284	10.85	7.45972	5.55717	3.36425	P53_peak_286
15	62262654	62262844	191	62262789	12.82	9.55182	6.48226	5.24245	P53_peak_287
15	63157153	63157348	196	63157251	17.75	14.0851	8.0216	9.46466	P53_peak_288
15	68271891	68272250	360	68272032	21.69	11.7967	5.67254	7.32262	P53_peak_289
15	71364090	71364351	262	71364230	26.62	19.2696	8.38995	14.3601	P53_peak_290
15	72231174	72231518	345	72231322	18.73	9.25272	4.9331	4.98355	P53_peak_291
15	73165884	73166074	191	73165989	21.69	13.3903	6.51454	8.80618	P53_peak_292
15	76336582	76336795	214	76336683	15.77	9.31879	5.59155	5.03463	P53_peak_293
15	79923848	79924046	199	79923959	16.76	7.66459	4.44014	3.53922	P53_peak_294
15	80003217	80003521	305	80003367	26.62	20.2101	8.90671	15.2562	P53_peak_295
15	88288174	88288444	271	88288316	17.75	13.1195	7.41554	8.55599	P53_peak_296
15	89334902	89335110	209	89335008	16.76	11.1808	6.48646	6.75353	P53_peak_297
15	92949984	92950265	282	92950116	22.68	18.9305	9.43683	14.0397	P53_peak_298
16	569819	570055	237	569944	15.77	12.9238	7.8699	8.37263	P53_peak_299
16	592592	592829	238	592701	19.72	17.6758	9.65439	12.8466	P53_peak_300
16	649438	649628	191	649542	11.83	8.42803	5.97902	4.23344	P53_peak_301
16	682075	682337	263	682228	9.86	5.82348	4.64662	1.95993	P53_peak_302
16	1961128	1962189	1062	1961273	17.75	11.5315	6.44209	7.07933	P53_peak_303a
16	1961128	1962189	1062	1961719	15.77	9.31879	5.59155	5.03463	P53_peak_303b
16	1961128	1962189	1062	1962055	17.75	12.2769	6.89462	7.76848	P53_peak_303c
16	1962379	1962848	470	1962675	11.83	6.54267	4.71901	2.55958	P53_peak_304
16	1963904	1964229	326	1963995	11.83	6.34635	4.59004	2.4145	P53_peak_305
16	2682303	2682536	234	2682419	21.69	15.2573	7.56338	10.564	P53_peak_306
16	3150524	3150753	230	3150631	16.76	9.92876	5.72737	5.5949	P53_peak_307
16	3157269	3157565	297	3157478	16.76	7.66459	4.44014	3.53922	P53_peak_308
16	4140793	4141037	245	4140920	20.7	13.0917	6.59302	8.53151	P53_peak_309
16	11562497	11562788	292	11562655	21.69	16.5876	8.34503	11.8139	P53_peak_310
16	15644304	15644494	191	15644371	14.79	6.17368	3.94718	2.25719	P53_peak_311
16	22195704	22195935	232	22195801	16.76	12.6677	7.41785	8.14047	P53_peak_312
16	22298487	22298678	192	22298577	16.76	11.2546	6.53202	6.81572	P53_peak_313
16	25553788	25553978	191	25553906	16.76	10.2513	5.92019	5.88925	P53_peak_314
16	27318426	27318630	205	27318530	15.77	12.8412	7.8167	8.30139	P53_peak_315
16	28537185	28537429	245	28537310	18.73	15.2393	8.44347	10.5503	P53_peak_316
16	29805514	29805716	203	29805689	11.83	5.45432	4.01407	1.67823	P53_peak_317
16	29807611	29807924	314	29807780	17.75	6.60524	3.7493	2.61757	P53_peak_318
16	29811268	29811743	476	29811496	22.68	12.6839	5.91901	8.153	P53_peak_319
16	30096126	30096458	333	30096375	13.8	6.69448	4.41967	2.68927	P53_peak_320
16	30377899	30378115	217	30378001	12.82	5.72676	4.01094	1.87556	P53_peak_321
16	33336669	33337045	377	33336792	30.56	16.9306	6.31268	12.1411	P53_peak_322a
16	33336669	33337045	377	33337024	13.8	6.03739	4.02907	2.13817	P53_peak_322b
16	33337555	33337861	307	33337721	46.34	20.363	5.25978	15.398	P53_peak_323
16	33338055	33338279	225	33338173	34.51	15.8925	5.27594	11.1639	P53_peak_324
16	33338454	33338865	412	33338583	28.59	12.7692	4.93193	8.23385	P53_peak_325
16	33339254	33339475	222	33339341	17.75	8.44714	4.68662	4.2474	P53_peak_326
16	33339689	33339938	250	33339831	28.59	15.1622	5.91831	10.4777	P53_peak_327
16	34062816	34063115	300	34063018	19.72	8.68487	4.47576	4.45949	P53_peak_328
16	34571597	34571854	258	34571734	37.46	12.253	3.84648	7.74663	P53_peak_329
16	34576370	34576603	234	34576491	187.32	48.4202	3.62161	42.633	P53_peak_330
16	34581400	34581631	232	34581519	185.35	35.3901	2.91175	29.9151	P53_peak_331
16	34582216	34582422	207	34582309	241.55	25.8384	2.14645	20.6444	P53_peak_332
16	34582973	34583171	199	34583063	243.52	23.1085	2.03768	18.017	P53_peak_333
16	34583314	34583642	329	34583460	241.55	40.8336	2.72527	35.2198	P53_peak_334
16	34584810	34585017	208	34584939	96.62	10.4012	2.07702	6.02864	P53_peak_335
16	34585613	34585813	201	34585707	100.56	16.0066	2.53908	11.2724	P53_peak_336
16	34586748	34586941	194	34586851	163.66	27.0151	2.65584	21.7793	P53_peak_337
16	34588044	34588278	235	34588154	231.69	18.2475	1.89179	13.3899	P53_peak_338
16	34592637	34592852	216	34592736	223.8	36.7217	2.67622	31.2135	P53_peak_339
16	34594805	34595190	386	34594951	87.75	13.3756	2.46518	8.79378	P53_peak_340
16	34595384	34595598	215	34595498	129.15	23.4428	2.76925	18.3416	P53_peak_341
16	46386342	46386598	257	46386454	233.66	41.1489	2.7936	35.5304	P53_peak_342
16	46387697	46388084	388	46387916	261.27	29.5743	2.20393	24.2659	P53_peak_343
16	46388629	46389068	440	46388731	197.18	19.2154	2.04312	14.3088	P53_peak_344a
16	46388629	46389068	440	46388956	182.39	22.3148	2.26413	17.2631	P53_peak_344b
16	46389664	46390880	1217	46389995	276.06	23.4839	1.9511	18.3819	P53_peak_345a
16	46389664	46390880	1217	46390352	255.35	13.5436	1.65855	8.95426	P53_peak_345b
16	46389664	46390880	1217	46390662	302.68	12.7874	1.56534	8.25135	P53_peak_345c
16	46391064	46391338	275	46391143	174.51	18.6964	2.12589	13.8171	P53_peak_346
16	46394506	46395054	549	46394804	291.83	14.2089	1.62684	9.5786	P53_peak_347
16	46398599	46399055	457	46398893	259.3	37.1012	2.47901	31.5832	P53_peak_348
16	46399211	46399629	419	46399471	286.9	36.3579	2.34066	30.8584	P53_peak_349
16	46400060	46401180	1121	46400169	242.54	28.8405	2.25496	23.5512	P53_peak_350a
16	46400060	46401180	1121	46400620	197.18	24.1827	2.26931	19.0525	P53_peak_350b
16	46400060	46401180	1121	46400853	171.55	18.5554	2.13451	13.6815	P53_peak_350c
16	46400060	46401180	1121	46401103	159.72	15.7386	2.04617	11.0166	P53_peak_350d
16	46401333	46401575	243	46401456	220.85	36.9092	2.70543	31.3974	P53_peak_351
16	53378108	53378380	273	53378253	27.61	20.3579	8.68944	15.3938	P53_peak_352
16	85152814	85153004	191	85152953	14.79	9.82954	6.15257	5.50252	P53_peak_353
16	86502523	86502713	191	86502639	11.83	7.44145	5.31656	3.36375	P53_peak_354
16	88809967	88810358	392	88810169	8.87	5.47258	4.60076	1.68167	P53_peak_355
17	4854356	4854668	313	4854525	37.46	33.3548	12.404	27.9367	P53_peak_356
17	7484282	7484819	538	7484497	18.73	12.5316	6.78089	8.01224	P53_peak_357
17	7572606	7573010	405	7572807	8.87	5.35917	4.5203	1.5911	P53_peak_358
17	7573742	7573987	246	7573888	9.86	6.16789	4.88623	2.25651	P53_peak_359
17	7673570	7673904	335	7673693	84.79	6.04299	1.75079	2.14368	P53_peak_360
17	8119676	8119868	193	8119778	17.75	11.9683	6.70619	7.48331	P53_peak_361
17	8186711	8187336	626	8187258	12.82	8.20737	5.5923	4.04048	P53_peak_362
17	8187537	8187798	262	8187678	16.76	10.2513	5.92019	5.88925	P53_peak_363
17	8220803	8221030	228	8220919	14.79	9.97494	6.24554	5.63681	P53_peak_364
17	8226199	8226476	278	8226362	16.76	7.66459	4.44014	3.53922	P53_peak_365
17	19063723	19064000	278	19063865	30.56	20.3845	7.89085	15.4177	P53_peak_366
17	19111898	19112413	516	19112303	16.76	14.1023	8.33244	9.4757	P53_peak_367
17	19188005	19188233	229	19188121	44.37	30.6829	9.07324	25.3379	P53_peak_368
17	21375861	21376173	313	21376024	24.65	24.3214	12.0328	19.1842	P53_peak_369
17	21818007	21818285	279	21818161	33.52	23.5121	8.63028	18.4069	P53_peak_370
17	21969251	21969460	210	21969363	59.15	7.51457	2.14839	3.41643	P53_peak_371
17	21972978	21973180	203	21973078	121.27	16.5891	2.3513	11.8152	P53_peak_372
17	21976666	21977034	369	21976732	27.61	7.7234	3.23923	3.59157	P53_peak_373a
17	21976666	21977034	369	21976939	49.3	8.59735	2.51479	4.37798	P53_peak_373b
17	23016253	23016460	208	23016360	115.35	21.0674	2.77029	16.0708	P53_peak_374
17	24421379	24421573	195	24421470	94.65	24.7467	3.54251	19.5941	P53_peak_375
17	25074346	25074561	216	25074456	104.51	43.967	5.553	38.2834	P53_peak_376
17	25389830	25390021	192	25389927	90.7	18.5714	2.9582	13.6972	P53_peak_377
17	25920114	25920305	192	25920214	110.42	21.2145	2.85699	16.2109	P53_peak_378
17	26594785	26595002	218	26594890	130.14	29.2737	3.19856	23.9743	P53_peak_379
17	26603701	26604362	662	26603869	172.54	19.8533	2.19665	14.9137	P53_peak_380a
17	26603701	26604362	662	26604224	111.41	23.721	3.06148	18.6061	P53_peak_380b
17	26619434	26620142	709	26619684	159.72	14.6268	1.98418	9.96715	P53_peak_381a
17	26619434	26620142	709	26620023	132.11	20.3152	2.51156	15.3576	P53_peak_381b
17	26885712	26885905	194	26885808	113.38	26.4313	3.26801	21.2185	P53_peak_382
17	28282710	28282960	251	28282829	15.77	9.31879	5.59155	5.03463	P53_peak_383
17	29294112	29294365	254	29294198	10.85	6.34095	4.79422	2.40962	P53_peak_384
17	31274317	31274528	212	31274429	16.76	5.94584	3.55211	2.05528	P53_peak_385
17	31549973	31550330	358	31550205	13.8	7.93902	5.18906	3.7945	P53_peak_386
17	38867482	38867776	295	38867629	15.77	10.6896	6.44089	6.2922	P53_peak_387
17	39046708	39047037	330	39046881	51.27	56.1631	19.089	50.2011	P53_peak_388
17	42553227	42553503	277	42553398	11.83	6.64464	4.78625	2.65387	P53_peak_389
17	42609459	42609649	191	42609546	11.83	7.97693	5.67592	3.82985	P53_peak_390
17	43315859	43316049	191	43315931	9.86	5.76934	4.60895	1.91498	P53_peak_391
17	44152921	44153256	336	44153072	24.65	20.4874	9.70555	15.5174	P53_peak_392
17	44348866	44349072	207	44348967	18.73	15.1301	8.37502	10.4491	P53_peak_393
17	47649816	47650006	191	47649975	13.8	8.52376	5.56141	4.30742	P53_peak_394
17	57524009	57524256	248	57524131	30.56	14.3451	5.26056	9.70005	P53_peak_395
17	58659114	58659306	193	58659297	14.79	6.17368	3.94718	2.25719	P53_peak_396
17	59619703	59619945	243	59619829	13.8	8.71406	5.68377	4.48302	P53_peak_397
17	63600730	63600962	233	63600842	19.72	13.0948	6.84993	8.53429	P53_peak_398
17	64504963	64505159	197	64505135	12.82	7.71043	5.26659	3.579	P53_peak_399
17	69430475	69430776	302	69430642	20.7	10.9285	5.42606	6.51535	P53_peak_400
17	69607246	69607498	253	69607361	19.72	10.0802	5.17958	5.7342	P53_peak_401
17	73224801	73225017	217	73224920	28.59	21.4613	8.98893	16.4465	P53_peak_402
17	75779692	75779882	191	75779777	13.8	8.16435	5.33185	4.00079	P53_peak_403
17	78460213	78460512	300	78460342	19.72	15.9645	8.5847	11.2329	P53_peak_404
17	80109688	80109919	232	80109807	20.7	17.254	9.06496	12.4515	P53_peak_405
17	81512580	81512886	307	81512653	10.85	5.08049	3.94836	1.35493	P53_peak_406
17	81867194	81867384	191	81867355	12.82	8.34066	5.68012	4.16526	P53_peak_407
17	81868684	81868983	300	81868778	11.83	7.63435	5.44586	3.51608	P53_peak_408
17	82332236	82332498	263	82332365	22.68	19.0498	9.50922	14.1509	P53_peak_409
17	83069515	83070031	517	83069708	61.13	74.7352	24.5755	68.4821	P53_peak_410
17	83237866	83238134	269	83237997	32.54	31.5063	13.2655	26.1374	P53_peak_411
18	106739	106942	204	106835	72.96	19.225	3.5218	14.3178	P53_peak_412
18	107130	107512	383	107221	58.17	7.70748	2.19145	3.57663	P53_peak_413
18	107999	108610	612	108156	251.41	52.3108	3.11615	46.4455	P53_peak_414a
18	107999	108610	612	108471	193.24	37.472	2.94302	31.9467	P53_peak_414b
18	110248	110707	460	110392	202.11	35.8552	2.78237	30.3691	P53_peak_415
18	112185	112445	261	112309	94.65	36.4906	5.0341	30.989	P53_peak_416
18	25533318	25533538	221	25533389	15.77	10.3266	6.21306	5.9587	P53_peak_417
18	32308551	32308774	224	32308681	26.62	16.3466	6.87434	11.5916	P53_peak_418
18	32383066	32383260	195	32383155	16.76	7.9497	4.59523	3.80454	P53_peak_419
18	33560781	33560987	207	33560888	22.68	16.037	7.7302	11.3011	P53_peak_420
18	35972479	35972760	282	35972605	19.72	10.0802	5.17958	5.7342	P53_peak_421
18	36672435	36672625	191	36672567	21.69	8.39873	4.06342	4.21966	P53_peak_422
18	40216000	40216289	290	40216121	40.42	26.5338	8.28451	21.3167	P53_peak_423
19	808642	808832	191	808735	10.85	7.45972	5.55717	3.36425	P53_peak_424
19	878417	879104	688	878502	13.8	7.53305	4.93427	3.42297	P53_peak_425a
19	878417	879104	688	879048	12.82	8.01451	5.46555	3.86067	P53_peak_425b
19	879653	879856	204	879748	20.7	8.71601	4.34085	4.4832	P53_peak_426
19	1269848	1270038	191	1269938	13.8	9.33391	6.08543	5.04924	P53_peak_427
19	1383333	1383877	545	1383773	19.72	16.4157	8.86535	11.6559	P53_peak_428
19	1438368	1438569	202	1438525	13.8	9.63638	6.28276	5.32159	P53_peak_429
19	1438895	1439139	245	1439040	12.82	6.6833	4.60563	2.67831	P53_peak_430
19	1440010	1440385	376	1440295	12.82	9.07209	6.16413	4.81756	P53_peak_431
19	1445005	1445208	204	1445082	10.85	7.4046	5.5196	3.33093	P53_peak_432
19	1672927	1673197	271	1673018	9.86	5.87851	4.68491	1.99508	P53_peak_433
19	2049931	2050121	191	2050020	10.85	6.86698	5.15272	2.84556	P53_peak_434
19	2272800	2273221	422	2272879	9.86	6.46796	5.09462	2.49234	P53_peak_435
19	3093961	3094151	191	3094083	9.86	6.46796	5.09462	2.49234	P53_peak_436
19	4723954	4724154	201	4724057	16.76	10.2513	5.92019	5.88925	P53_peak_437
19	5690193	5690499	307	5690290	14.79	9.97494	6.24554	5.63681	P53_peak_438
19	6577471	6577692	222	6577584	18.73	12.5316	6.78089	8.01224	P53_peak_439
19	9622002	9622216	215	9622093	14.79	11.7714	7.40735	7.3015	P53_peak_440
19	9622633	9622893	261	9622762	19.72	17.7805	9.72008	12.9428	P53_peak_441
19	10554255	10554477	223	10554391	19.72	15.0384	8.01389	10.3621	P53_peak_442
19	15646687	15646895	209	15646773	20.7	10.9285	5.42606	6.51535	P53_peak_443
19	17249965	17250238	274	17250139	18.73	12.1886	6.57747	7.68512	P53_peak_444
19	18224335	18224932	598	18224639	57.18	61.765	19.3944	55.6988	P53_peak_445
19	18364841	18365114	274	18364995	17.75	12.8552	7.25118	8.31454	P53_peak_446
19	18373842	18374053	212	18373926	12.82	7.37115	5.04616	3.30278	P53_peak_447
19	18386090	18386282	193	18386172	16.76	11.2546	6.53202	6.81572	P53_peak_448
19	33176943	33177242	300	33177075	15.77	9.31879	5.59155	5.03463	P53_peak_449
19	33302416	33302699	284	33302467	9.86	5.87851	4.68491	1.99508	P53_peak_450
19	36269342	36269534	193	36269440	27.61	17.3804	7.15141	12.5695	P53_peak_451
19	37281369	37281594	226	37281475	33.52	16.81	5.75352	12.0265	P53_peak_452
19	37293410	37293863	454	37293712	40.42	16.9191	4.90266	12.1319	P53_peak_453
19	37294423	37294664	242	37294531	35.49	25.6604	9.12324	20.4733	P53_peak_454
19	41528211	41528467	257	41528357	29.58	19.1514	7.53882	14.2469	P53_peak_455
19	41859636	41859949	314	41859733	12.82	6.6833	4.60563	2.67831	P53_peak_456
19	41860259	41860533	275	41860398	11.83	7.08069	5.07555	3.03472	P53_peak_457
19	41920107	41920350	244	41920232	24.65	16.3512	7.36373	11.5954	P53_peak_458
19	46133487	46133747	261	46133595	30.56	14.3451	5.26056	9.70005	P53_peak_459
19	47231180	47231416	237	47231331	21.69	20.34	10.6452	15.3776	P53_peak_460
19	47232438	47232653	216	47232542	16.76	12.9541	7.59973	8.39888	P53_peak_461
19	48955047	48955246	200	48955153	14.79	11.1199	6.98431	6.69527	P53_peak_462
19	49487582	49487772	191	49487672	12.82	8.01451	5.46555	3.86067	P53_peak_463
19	50136793	50137126	334	50136946	17.75	5.77689	3.35718	1.9216	P53_peak_464
19	50794965	50795441	477	50795043	11.83	8.48863	6.01971	4.27378	P53_peak_465
19	50896557	50896847	291	50896715	39.44	30.0967	10.1092	24.7699	P53_peak_466
19	51397475	51397796	322	51397641	23.66	17.4005	8.22066	12.586	P53_peak_467
19	58554828	58555228	401	58554953	18.73	16.5319	9.25754	11.7626	P53_peak_468
2	1488938	1489368	431	1489140	41.41	49.1479	19.7616	43.3399	P53_peak_469
2	1705041	1705270	230	1705156	17.75	15.3054	8.79499	10.605	P53_peak_470
2	20643091	20643286	196	20643186	15.77	11.3229	6.84233	6.88091	P53_peak_471
2	24084281	24084525	245	24084411	22.68	16.7423	8.1361	11.9616	P53_peak_472
2	27050635	27050938	304	27050783	20.7	11.2928	5.61558	6.85291	P53_peak_473
2	37654144	37654388	245	37654266	21.69	18.5773	9.55294	13.7024	P53_peak_474
2	37786960	37787172	213	37787067	16.76	11.9623	6.97286	7.47791	P53_peak_475
2	39405389	39405641	253	39405501	26.62	23.7049	10.9255	18.5917	P53_peak_476
2	39492253	39492514	262	39492330	9.86	5.22572	4.23161	1.48593	P53_peak_477
2	47176386	47176706	321	47176526	11.83	7.63435	5.44586	3.51608	P53_peak_478
2	50651435	50651635	201	50651511	13.8	10.6468	6.9448	6.25222	P53_peak_479
2	68744543	68744835	293	68744675	22.68	17.7155	8.70763	12.8842	P53_peak_480
2	86441068	86441286	219	86441240	14.79	11.7714	7.40735	7.3015	P53_peak_481
2	88191621	88191824	204	88191728	14.79	11.7714	7.40735	7.3015	P53_peak_482
2	89828508	89828712	205	89828617	45.35	14.4988	3.86268	9.84638	P53_peak_483
2	89829208	89829510	303	89829258	31.55	6.69973	2.71244	2.69364	P53_peak_484a
2	89829208	89829510	303	89829457	26.62	5.19227	2.51088	1.45637	P53_peak_484b
2	89830919	89831188	270	89831046	82.82	15.6291	2.7939	10.9104	P53_peak_485
2	89836299	89836580	282	89836453	32.54	6.35161	2.57963	2.41942	P53_peak_486
2	89840306	89840556	251	89840526	20.7	6.87333	3.52513	2.85164	P53_peak_487
2	89840981	89841180	200	89841085	42.39	9.41343	2.89296	5.12371	P53_peak_488
2	90390514	90390821	308	90390679	72.96	8.35513	2.11308	4.17789	P53_peak_489
2	90397540	90397894	355	90397636	74.93	9.04563	2.16942	4.7926	P53_peak_490
2	90398486	90398748	263	90398543	69.01	6.05993	1.84248	2.15909	P53_peak_491a
2	90398486	90398748	263	90398661	61.13	7.68313	2.1423	3.55692	P53_peak_491b
2	92632227	92632422	196	92632334	29.58	19.3689	7.64437	14.4542	P53_peak_492
2	92750484	92750674	191	92750591	18.73	16.5319	9.25754	11.7626	P53_peak_493
2	111120642	111120858	217	111120747	12.82	9.40005	6.38165	5.11162	P53_peak_494
2	113614047	113614288	242	113614172	23.66	17.4005	8.22066	12.586	P53_peak_495
2	119240623	119240842	220	119240730	22.68	19.6719	9.88851	14.7415	P53_peak_496
2	134131782	134131973	192	134131875	16.76	12.6677	7.41785	8.14047	P53_peak_497
2	160352581	160352796	216	160352692	23.66	16.1014	7.49149	11.3607	P53_peak_498
2	168452869	168453086	218	168452971	23.66	19.7685	9.61031	14.8335	P53_peak_499
2	169954052	169954286	235	169954185	25.63	19.6141	8.87793	14.6852	P53_peak_500
2	171434026	171434376	351	171434125	12.82	8.14216	5.5494	3.97924	P53_peak_501
2	172101055	172101480	426	172101141	10.85	7.45972	5.55717	3.36425	P53_peak_502
2	177170247	177170465	219	177170361	17.75	12.2769	6.89462	7.76848	P53_peak_503
2	192544718	192544984	267	192544901	13.8	10.5752	6.89786	6.19105	P53_peak_504
2	196799586	196799794	209	196799697	13.8	7.77685	5.08688	3.63944	P53_peak_505
2	218963068	218963258	191	218963156	9.86	5.76934	4.60895	1.91498	P53_peak_506
2	231713685	231714009	325	231713858	11.83	7.70067	5.49037	3.57004	P53_peak_507
2	232518838	232519053	216	232518943	20.7	15.4789	7.98243	10.7666	P53_peak_508
2	238452921	238453439	519	238453048	28.59	28.0228	12.7665	22.7585	P53_peak_509a
2	238452921	238453439	519	238453336	16.76	12.7617	7.4775	8.22739	P53_peak_509b
2	239347917	239348262	346	239348025	17.75	13.982	7.95657	9.36878	P53_peak_510
2	240434004	240434231	228	240434114	20.7	14.2141	7.23474	9.57892	P53_peak_511
20	5119921	5120233	313	5120113	10.85	5.08049	3.94836	1.35493	P53_peak_512
20	20603443	20603667	225	20603561	20.7	17.6131	9.28722	12.789	P53_peak_513
20	28839450	28839641	192	28839502	28.59	8.09835	3.28795	3.94084	P53_peak_514
20	29411334	29411664	331	29411455	17.75	8.44714	4.68662	4.2474	P53_peak_515
20	30283831	30284021	191	30283953	22.68	10.2238	4.73521	5.87041	P53_peak_516
20	30819813	30820003	191	30819880	13.8	7.53305	4.93427	3.42297	P53_peak_517
20	31054624	31054827	204	31054728	47.32	9.23265	2.68466	4.96905	P53_peak_518
20	31064009	31064203	195	31064097	34.51	9.2175	3.22791	4.95559	P53_peak_519
20	31064976	31065268	293	31065068	40.42	7.63015	2.58891	3.51267	P53_peak_520
20	31067992	31068395	404	31068114	33.52	15.9626	5.43811	11.2313	P53_peak_521
20	31071789	31072084	296	31071833	15.77	5.55797	3.48022	1.72709	P53_peak_522
20	31241630	31241970	341	31241782	87.75	9.38908	2.06387	5.10145	P53_peak_523
20	35866568	35866782	215	35866667	15.77	11.8478	7.17786	7.36677	P53_peak_524
20	45339227	45339420	194	45339340	18.73	12.5316	6.78089	8.01224	P53_peak_525
20	46169344	46169534	191	46169438	16.76	10.2513	5.92019	5.88925	P53_peak_526
20	50931192	50931382	191	50931360	9.86	5.99134	4.76341	2.09721	P53_peak_527
20	56520887	56521123	237	56521014	15.77	9.31879	5.59155	5.03463	P53_peak_528
20	62500430	62500655	226	62500560	12.82	7.4259	5.08161	3.34925	P53_peak_529
20	63693455	63693668	214	63693574	26.62	20.7457	9.20657	15.7613	P53_peak_530
20	63956209	63956399	191	63956333	11.83	8.34949	5.92628	4.17244	P53_peak_531
20	64214109	64214399	291	64214258	21.69	15.2573	7.56338	10.564	P53_peak_532
21	7962858	7963050	193	7963032	15.77	9.31879	5.59155	5.03463	P53_peak_533
21	8208361	8208614	254	8208472	15.77	12.9238	7.8699	8.37263	P53_peak_534
21	8213088	8213326	239	8213207	23.66	22.9764	11.5703	17.892	P53_peak_535
21	8214606	8214850	245	8214726	18.73	16.5319	9.25754	11.7626	P53_peak_536
21	8219724	8220369	646	8219998	119.3	78.5941	10.0246	72.2897	P53_peak_537
21	8220548	8220810	263	8220678	20.7	19.0502	10.1826	14.1509	P53_peak_538
21	8228588	8228889	302	8228744	69.01	37.1313	7.00141	31.6117	P53_peak_539
21	8229535	8229818	284	8229699	18.73	11.3693	6.10022	6.92592	P53_peak_540
21	8230334	8230879	546	8230707	71.97	29.144	5.21227	23.8478	P53_peak_541
21	8233075	8233337	263	8233215	68.03	33.5095	6.27529	28.0856	P53_peak_542
21	8234098	8234681	584	8234230	65.07	26.636	5.08234	21.4152	P53_peak_543a
21	8234098	8234681	584	8234497	133.1	53.6894	5.36394	47.7976	P53_peak_543b
21	8405493	8405700	208	8405601	49.3	22.7291	5.58842	17.6578	P53_peak_544
21	8420012	8420684	673	8420176	77.89	51.8422	9.77902	45.9878	P53_peak_545a
21	8420012	8420684	673	8420468	112.39	75.6516	10.3086	69.3843	P53_peak_545b
21	9815762	9815952	191	9815853	17.75	15.3054	8.79499	10.605	P53_peak_546
21	9819385	9819745	361	9819459	11.83	8.48863	6.01971	4.27378	P53_peak_547
21	9821474	9821800	327	9821603	52.25	25.1721	5.91706	20.0042	P53_peak_548
21	10428058	10428387	330	10428205	17.75	5.53515	3.24614	1.70476	P53_peak_549
21	10432080	10432318	239	10432169	18.73	9.25272	4.9331	4.98355	P53_peak_550
21	10692733	10692965	233	10692846	146.9	15.1327	2.08312	10.4512	P53_peak_551
21	25734878	25735068	191	25735039	13.8	10.3912	6.77723	6.01985	P53_peak_552
21	26845225	26845521	297	26845363	13.8	10.6468	6.9448	6.25222	P53_peak_553
21	31667585	31667887	303	31667735	24.65	18.4988	8.5493	13.6275	P53_peak_554
21	33367215	33367542	328	33367364	42.39	28.5884	8.67887	23.305	P53_peak_555
21	34675256	34675448	193	34675385	14.79	11.6943	7.35729	7.23305	P53_peak_556
21	46688687	46688940	254	46688809	22.68	21.649	11.1077	16.6224	P53_peak_557
22	10773393	10773651	259	10773545	17.75	8.44714	4.68662	4.2474	P53_peak_558
22	11026167	11026494	328	11026217	9.86	5.51105	4.42942	1.68745	P53_peak_559
22	11030028	11030317	290	11030198	13.8	7.53305	4.93427	3.42297	P53_peak_560
22	11057345	11057553	209	11057468	13.8	7.77685	5.08688	3.63944	P53_peak_561
22	11067046	11067242	197	11067122	10.85	7.4046	5.5196	3.33093	P53_peak_562
22	12693694	12694073	380	12693873	37.46	12.253	3.84648	7.74663	P53_peak_563
22	18730491	18730683	193	18730581	60.14	21.2991	4.3672	16.2921	P53_peak_564
22	19984428	19984703	276	19984560	13.8	9.71493	6.33411	5.39499	P53_peak_565
22	20117072	20117415	344	20117276	11.83	8.48863	6.01971	4.27378	P53_peak_566
22	20410353	20410610	258	20410485	19.72	10.0802	5.17958	5.7342	P53_peak_567
22	29071472	29071736	265	29071612	16.76	10.6882	6.18447	6.29112	P53_peak_568
22	30245814	30246044	231	30245928	20.7	16.2648	8.45773	11.5181	P53_peak_569
22	31647136	31647341	206	31647229	21.69	15.2573	7.56338	10.564	P53_peak_570
22	35372009	35372242	234	35372115	19.72	12.1273	6.29353	7.63252	P53_peak_571
22	39319451	39319837	387	39319767	14.79	8.41215	5.26291	4.22034	P53_peak_572
22	39520260	39520517	258	39520333	13.8	6.82164	4.4966	2.80303	P53_peak_573
22	39522774	39523468	695	39523331	14.79	8.41215	5.26291	4.22034	P53_peak_574
22	41446725	41447001	277	41446878	20.7	10.9285	5.42606	6.51535	P53_peak_575
22	50105823	50106047	225	50105931	22.68	12.6839	5.91901	8.153	P53_peak_576
22	50796576	50796861	286	50796708	39.44	30.0967	10.1092	24.7699	P53_peak_577
3	4995052	4995271	220	4995159	17.75	12.1208	6.7991	7.62733	P53_peak_578
3	11509361	11509620	260	11509549	13.8	8.97996	5.85555	4.73085	P53_peak_579
3	15783517	15783710	194	15783603	13.8	7.99435	5.22403	3.84521	P53_peak_580
3	24494842	24495129	288	24494961	11.83	7.83655	5.5816	3.69651	P53_peak_581
3	32106331	32106595	265	32106462	13.8	9.71493	6.33411	5.39499	P53_peak_582
3	42823441	42823633	193	42823536	21.69	9.46042	4.53803	5.16701	P53_peak_583
3	48432543	48432805	263	48432669	19.72	16.5328	8.9384	11.7631	P53_peak_584
3	49358401	49358652	252	49358599	12.82	6.6833	4.60563	2.67831	P53_peak_585
3	49723720	49724079	360	49723807	13.8	8.77919	5.72576	4.54171	P53_peak_586
3	50268312	50268523	212	50268415	19.72	14.4794	7.67373	9.82791	P53_peak_587
3	51995837	51996051	215	51995982	10.85	6.34095	4.79422	2.40962	P53_peak_588
3	53270038	53270261	224	53270134	17.75	11.8194	6.61578	7.34246	P53_peak_589
3	58874476	58874666	191	58874566	14.79	8.41215	5.26291	4.22034	P53_peak_590
3	75669045	75669562	518	75669243	204.08	78.9934	5.25858	72.6853	P53_peak_591
3	90901443	90901633	191	90901539	12.82	9.55182	6.48226	5.24245	P53_peak_592
3	107562083	107562274	192	107562245	13.8	10.3912	6.77723	6.01985	P53_peak_593
3	108589341	108589577	237	108589413	9.86	6.16789	4.88623	2.25651	P53_peak_594
3	108914893	108915086	194	108915047	11.83	8.48863	6.01971	4.27378	P53_peak_595
3	119638957	119639240	284	119639094	22.68	20.9148	10.6534	15.9253	P53_peak_596
3	125931573	125931862	290	125931717	29.58	31.1295	14.2486	25.774	P53_peak_597
3	128153348	128153547	200	128153440	12.82	9.07209	6.16413	4.81756	P53_peak_598
3	128487866	128488056	191	128487959	11.83	7.70067	5.49037	3.57004	P53_peak_599
3	130095950	130096237	288	130096091	25.63	23.8848	11.3966	18.7627	P53_peak_600
3	136191472	136191662	191	136191653	8.87	5.35917	4.5203	1.5911	P53_peak_601
3	153160654	153160994	341	153160796	16.76	14.0142	8.27612	9.39865	P53_peak_602
3	156044339	156044581	243	156044447	18.73	14.3119	7.86496	9.6691	P53_peak_603
3	156760502	156760714	213	156760604	22.68	19.8018	9.96803	14.8644	P53_peak_604
3	157159965	157160296	332	157160233	17.75	10.2625	5.69456	5.89761	P53_peak_605
3	179070108	179070330	223	179070208	17.75	12.2769	6.89462	7.76848	P53_peak_606
3	185825041	185825311	271	185825206	11.83	8.19657	5.82353	4.03092	P53_peak_607
3	194134798	194135142	345	194134850	8.87	5.1443	4.36753	1.41108	P53_peak_608
3	196512098	196512346	249	196512183	11.83	5.86499	4.277	1.98411	P53_peak_609
4	677977	678232	256	678139	11.83	7.70067	5.49037	3.57004	P53_peak_610
4	2937374	2937564	191	2937520	12.82	7.4259	5.08161	3.34925	P53_peak_611
4	3940102	3940389	288	3940241	30.56	29.3401	12.7751	24.0379	P53_peak_612
4	7702177	7702370	194	7702336	17.75	8.44714	4.68662	4.2474	P53_peak_613
4	7706331	7706664	334	7706461	16.76	12.575	7.35915	8.05353	P53_peak_614
4	31234582	31234797	216	31234693	16.76	14.1023	8.33244	9.4757	P53_peak_615
4	49092666	49092920	255	49092812	116.34	15.2965	2.30075	10.602	P53_peak_616
4	49097133	49097325	193	49097239	53.24	8.87757	2.46543	4.63526	P53_peak_617
4	49098533	49098850	318	49098715	48.31	10.5653	2.90058	6.18356	P53_peak_618
4	49101424	49101695	272	49101552	57.18	15.3445	3.42254	10.6409	P53_peak_619
4	49102308	49102723	416	49102540	161.69	26.1557	2.62403	20.9495	P53_peak_620
4	49103484	49103683	200	49103604	70	8.70975	2.15152	4.47919	P53_peak_621
4	49104348	49104550	203	49104444	71.97	17.561	3.3169	12.7405	P53_peak_622
4	49108234	49108484	251	49108359	167.61	31.9922	2.90699	26.6097	P53_peak_623
4	49109492	49110082	591	49109744	86.76	9.06361	2.04094	4.80988	P53_peak_624a
4	49109492	49110082	591	49109951	75.92	19.7694	3.49616	14.8341	P53_peak_624b
4	49110627	49110846	220	49110747	111.41	21.6858	2.88227	16.6584	P53_peak_625
4	49118820	49119137	318	49118958	128.17	14.6197	2.15282	9.96083	P53_peak_626
4	49119501	49119693	193	49119605	54.23	16.0226	3.68169	11.2873	P53_peak_627
4	49119979	49120348	370	49120212	106.48	26.9248	3.46706	21.6936	P53_peak_628
4	49120908	49121213	306	49121034	116.34	14.7183	2.2565	10.0552	P53_peak_629
4	49123334	49123748	415	49123419	33.52	8.66882	3.13828	4.44614	P53_peak_630a
4	49123334	49123748	415	49123716	23.66	5.42882	2.74022	1.65365	P53_peak_630b
4	49137120	49137321	202	49137223	88.73	13.1216	2.4252	8.55779	P53_peak_631
4	49144571	49144763	193	49144657	70.99	13.3497	2.76869	8.76883	P53_peak_632
4	49147273	49147523	251	49147386	156.76	16.9638	2.1319	12.1733	P53_peak_633
4	49149350	49149831	482	49149466	204.08	9.89884	1.60222	5.56813	P53_peak_634a
4	49149350	49149831	482	49149718	113.38	14.1919	2.24275	9.56279	P53_peak_634b
4	49150389	49150642	254	49150519	74.93	10.1713	2.3009	5.82246	P53_peak_635
4	49153210	49153790	581	49153650	72.96	18.1044	3.36172	13.2524	P53_peak_636
4	49154389	49154618	230	49154499	120.28	13.9525	2.16574	9.34068	P53_peak_637
4	49657523	49657743	221	49657617	79.86	18.7092	3.23437	13.829	P53_peak_638
4	49709698	49710148	451	49709756	101.55	6.8632	1.73064	2.84286	P53_peak_639a
4	49709698	49710148	451	49709985	86.76	13.9064	2.53526	9.29626	P53_peak_639b
4	49710617	49710903	287	49710753	121.27	20.6492	2.65799	15.6709	P53_peak_640
4	49711347	49711854	508	49711635	216.9	24.0181	2.17901	18.8927	P53_peak_641
4	50492265	50492455	191	50492347	11.83	8.48863	6.01971	4.27378	P53_peak_642
4	50567020	50567224	205	50567124	25.63	15.4524	6.65845	10.742	P53_peak_643
4	50676943	50677141	199	50677061	110.42	24.8617	3.1835	19.703	P53_peak_644
4	51093083	51093273	191	51093173	27.61	21.8929	9.53521	16.8565	P53_peak_645
4	51107205	51107520	316	51107357	57.18	13.226	3.06227	8.65044	P53_peak_646
4	52051865	52052078	214	52051964	16.76	14.1023	8.33244	9.4757	P53_peak_647
4	57078865	57079169	305	57078990	12.82	8.69195	5.91224	4.46283	P53_peak_648
4	74886545	74886790	246	74886683	26.62	26.0199	12.322	20.8176	P53_peak_649
4	76782017	76782243	227	76782126	13.8	10.6468	6.9448	6.25222	P53_peak_650
4	77928164	77928354	191	77928257	13.8	9.87578	6.43937	5.5459	P53_peak_651
4	98963550	98963764	215	98963657	25.63	19.6141	8.87793	14.6852	P53_peak_652
4	99949519	99949721	203	99949608	10.85	7.45972	5.55717	3.36425	P53_peak_653
4	122798278	122798469	192	122798379	15.77	10.9976	6.63554	6.57921	P53_peak_654
4	127783355	127783668	314	127783501	31.55	33.7869	15.0336	28.3533	P53_peak_655
4	135185342	135185535	194	135185448	15.77	12.9238	7.8699	8.37263	P53_peak_656
4	156771496	156771710	215	156771583	17.75	13.1195	7.41554	8.55599	P53_peak_657
4	189233860	189234054	195	189233961	63.1	15.3657	3.20493	10.6607	P53_peak_658
4	189810713	189810935	223	189810823	15.77	12.9238	7.8699	8.37263	P53_peak_659
4	190068354	190068757	404	190068523	22.68	12.6839	5.91901	8.153	P53_peak_660
4	190116004	190116442	439	190116115	24.65	21.8859	10.5438	16.8517	P53_peak_661
4	190122800	190123072	273	190122894	18.73	5.85335	3.28873	1.98411	P53_peak_662
4	190177725	190178280	556	190177913	39.44	13.5438	4.04366	8.95426	P53_peak_663a
4	190177725	190178280	556	190178195	38.45	16.5582	5.00898	11.7874	P53_peak_663b
4	190179497	190179708	212	190179605	204.08	35.9672	2.77141	30.4779	P53_peak_664
5	14264442	14264632	191	14264526	11.83	7.08069	5.07555	3.03472	P53_peak_665
5	27472013	27472318	306	27472165	43.38	46.9718	17.5555	41.2148	P53_peak_666
5	36442353	36442627	275	36442493	21.69	19.0917	9.87043	14.1911	P53_peak_667
5	42583463	42583653	191	42583553	9.86	6.46796	5.09462	2.49234	P53_peak_668
5	49599536	49599801	266	49599657	92.68	13.4236	2.40195	8.83866	P53_peak_669
5	49600002	49600920	919	49600087	61.13	7.43915	2.10892	3.36239	P53_peak_670a
5	49600002	49600920	919	49600588	81.83	8.87541	2.07077	4.6333	P53_peak_670b
5	49600002	49600920	919	49600779	82.82	13.3597	2.53991	8.77832	P53_peak_670c
5	49601584	49602210	627	49601668	180.42	19.9911	2.15979	15.0471	P53_peak_671a
5	49601584	49602210	627	49602061	171.55	24.7936	2.46499	19.6395	P53_peak_671b
5	49602352	49602818	467	49602441	87.75	10.4457	2.16883	6.07091	P53_peak_672a
5	49602352	49602818	467	49602714	65.07	8.56936	2.20235	4.35081	P53_peak_672b
5	49656750	49656975	226	49656843	51.27	7.45885	2.27786	3.36425	P53_peak_673
5	49657664	49657924	261	49657784	163.66	34.5117	3.10683	29.0584	P53_peak_674
5	49658386	49658796	411	49658594	242.54	11.4334	1.60221	6.98805	P53_peak_675
5	49659421	49660377	957	49659528	122.25	21.0879	2.67942	16.0907	P53_peak_676a
5	49659421	49660377	957	49659879	142.96	15.7904	2.14862	11.0669	P53_peak_676b
5	49659421	49660377	957	49660200	95.63	13.3416	2.35692	8.76099	P53_peak_676c
5	49660741	49661128	388	49661009	103.52	18.0247	2.68003	13.177	P53_peak_677
5	49661411	49661838	428	49661518	189.3	24.9078	2.34933	19.7479	P53_peak_678a
5	49661411	49661838	428	49661767	128.17	10.9198	1.89954	6.50959	P53_peak_678b
5	49666349	49666837	489	49666485	102.54	13.0143	2.25077	8.45749	P53_peak_679a
5	49666349	49666837	489	49666713	86.76	15.0784	2.65941	10.4007	P53_peak_679b
5	58921383	58921580	198	58921486	15.77	9.6022	5.76448	5.28919	P53_peak_680
5	66597466	66597725	260	66597595	19.72	15.3346	8.19553	10.6317	P53_peak_681
5	67094849	67095049	201	67094950	17.75	12.2769	6.89462	7.76848	P53_peak_682
5	68262492	68262770	279	68262629	40.42	44.1967	17.3005	38.5044	P53_peak_683
5	85320628	85320818	191	85320778	12.82	9.55182	6.48226	5.24245	P53_peak_684
5	91380074	91380307	234	91380201	9.86	5.76934	4.60895	1.91498	P53_peak_685
5	91383118	91383454	337	91383358	12.82	6.6833	4.60563	2.67831	P53_peak_686
5	93582836	93583026	191	93582954	10.85	7.4046	5.5196	3.33093	P53_peak_687
5	102755806	102756168	363	102755875	8.87	5.24983	4.4426	1.50732	P53_peak_688
5	121961778	121961968	191	121961869	12.82	8.47797	5.77075	4.27378	P53_peak_689
5	138465473	138465726	254	138465548	12.82	7.71043	5.26659	3.579	P53_peak_690
5	139232248	139232462	215	139232383	17.75	12.8552	7.25118	8.31454	P53_peak_691
5	141514368	141514573	206	141514469	15.77	9.91985	5.96008	5.58793	P53_peak_692
5	143061693	143061897	205	143061804	23.66	17.3741	8.20561	12.5654	P53_peak_693
5	160205212	160205546	335	160205371	22.68	16.3197	7.89202	11.5653	P53_peak_694
5	163509357	163509547	191	163509441	14.79	8.41215	5.26291	4.22034	P53_peak_695
5	164119826	164120271	446	164120048	27.61	25.1138	11.4017	19.9484	P53_peak_696
5	174328742	174328972	231	174328857	24.65	17.0586	7.74603	12.2644	P53_peak_697
5	176397197	176397414	218	176397302	24.65	16.2759	7.32357	11.529	P53_peak_698
5	177270037	177270279	243	177270166	20.7	12.4405	6.23147	7.92518	P53_peak_699
5	177455719	177455915	197	177455797	12.82	6.44544	4.45563	2.49234	P53_peak_700
5	179623559	179624013	455	179623636	14.79	9.22065	5.76631	4.95802	P53_peak_701
5	181188333	181188595	263	181188465	17.75	8.44714	4.68662	4.2474	P53_peak_702
5	181188823	181189013	191	181188895	15.77	8.74728	5.24782	4.51282	P53_peak_703
5	181191574	181191856	283	181191731	25.63	12.6201	5.32676	8.09542	P53_peak_704
5	181206705	181207077	373	181206790	12.82	6.0303	4.19711	2.13201	P53_peak_705a
5	181206705	181207077	373	181206976	13.8	7.53305	4.93427	3.42297	P53_peak_705b
5	181207512	181207850	339	181207751	25.63	15.4524	6.65845	10.742	P53_peak_706
5	181218270	181218543	274	181218388	19.72	11.5106	5.94841	7.06105	P53_peak_707
5	181221932	181222574	643	181222035	16.76	9.92876	5.72737	5.5949	P53_peak_708a
5	181221932	181222574	643	181222446	16.76	9.92876	5.72737	5.5949	P53_peak_708b
5	181241721	181242148	428	181241867	11.83	6.0693	4.40927	2.16603	P53_peak_709
6	10411905	10412140	236	10412006	10.85	7.45972	5.55717	3.36425	P53_peak_710
6	20835388	20835610	223	20835491	23.66	19.4179	9.40041	14.4996	P53_peak_711
6	26103800	26104083	284	26103875	11.83	7.08069	5.07555	3.03472	P53_peak_712
6	26313065	26313351	287	26313203	16.76	10.2513	5.92019	5.88925	P53_peak_713
6	26322817	26323028	212	26322864	10.85	6.02762	4.5817	2.13115	P53_peak_714
6	26521112	26521302	191	26521221	12.82	8.9163	6.06084	4.6713	P53_peak_715
6	26553412	26553732	321	26553573	12.82	7.95201	5.42456	3.80648	P53_peak_716
6	26556476	26556691	216	26556587	14.79	10.0492	6.29309	5.70767	P53_peak_717
6	27177173	27177363	191	27177262	11.83	6.54267	4.71901	2.55958	P53_peak_718
6	27280233	27280423	191	27280326	9.86	5.31807	4.29555	1.55389	P53_peak_719
6	27553375	27553673	299	27553525	24.65	18.4988	8.5493	13.6275	P53_peak_720
6	28863624	28863836	213	28863737	16.76	11.9623	6.97286	7.47791	P53_peak_721
6	28896086	28896433	348	28896338	11.83	8.48863	6.01971	4.27378	P53_peak_722
6	28940649	28941073	425	28940966	12.82	6.6833	4.60563	2.67831	P53_peak_723
6	28953213	28953419	207	28953326	14.79	10.5173	6.5943	6.13801	P53_peak_724
6	30721356	30721548	193	30721445	14.79	9.34998	5.8479	5.06447	P53_peak_725
6	31390550	31390796	247	31390705	16.76	7.66459	4.44014	3.53922	P53_peak_726
6	31487464	31487803	340	31487632	14.79	6.17368	3.94718	2.25719	P53_peak_727
6	31834961	31835151	191	31835033	8.87	5.1966	4.40475	1.45867	P53_peak_728
6	33277257	33277447	191	33277330	10.85	6.93022	5.19589	2.89799	P53_peak_729
6	36667215	36667405	191	36667316	18.73	9.57739	5.10541	5.26704	P53_peak_730
6	36676185	36676657	473	36676442	70	60.8958	14.2	54.85	P53_peak_731
6	36677243	36677433	191	36677353	14.79	8.79192	5.49785	4.55416	P53_peak_732
6	37244873	37245063	191	37244992	18.73	10.0685	5.37082	5.72601	P53_peak_733
6	41846567	41846800	234	41846705	19.72	6.46191	3.45305	2.49234	P53_peak_734
6	44246912	44247168	257	44246993	10.85	5.08049	3.94836	1.35493	P53_peak_735
6	47670113	47670330	218	47670218	17.75	8.44714	4.68662	4.2474	P53_peak_736
6	59140557	59140747	191	59140639	25.63	12.6201	5.32676	8.09542	P53_peak_737
6	63573501	63573898	398	63573725	29.58	24.7946	10.5077	19.6397	P53_peak_738
6	73520915	73521107	193	73521005	13.8	8.97996	5.85555	4.73085	P53_peak_739
6	80536261	80536561	301	80536403	23.66	22.9764	11.5703	17.892	P53_peak_740
6	85678633	85678827	195	85678780	11.83	7.97693	5.67592	3.82985	P53_peak_741
6	105954346	105954536	191	105954434	17.75	14.0851	8.0216	9.46466	P53_peak_742
6	106098446	106098733	288	106098575	16.76	11.2546	6.53202	6.81572	P53_peak_743
6	110875582	110876008	427	110875641	10.85	5.34665	4.12462	1.58076	P53_peak_744
6	110876184	110876443	260	110876274	15.77	9.42007	5.65317	5.12977	P53_peak_745
6	111107092	111107413	322	111107263	45.35	43.8016	14.9475	38.1204	P53_peak_746
6	111483799	111484277	479	111484134	25.63	21.0897	9.72711	16.0923	P53_peak_747
6	112331308	112331525	218	112331419	20.7	13.8065	6.99911	9.20034	P53_peak_748
6	113632526	113632728	203	113632635	14.79	8.39648	5.25328	4.21755	P53_peak_749
6	118574015	118574343	329	118574182	42.39	46.6768	17.8394	40.93	P53_peak_750
6	125780212	125780502	291	125780323	23.66	17.9398	8.5309	13.0949	P53_peak_751
6	127632598	127632794	197	127632684	15.77	10.1877	6.12638	5.8382	P53_peak_752
6	131628142	131628427	286	131628292	25.63	19.6141	8.87793	14.6852	P53_peak_753
6	142377368	142377560	193	142377458	14.79	9.82954	6.15257	5.50252	P53_peak_754
6	143450678	143450870	193	143450784	17.75	11.5315	6.44209	7.07933	P53_peak_755
6	147044296	147044544	249	147044444	19.72	13.1909	6.9061	8.61665	P53_peak_756
6	150857222	150857504	283	150857371	31.55	17.8356	6.50986	12.9953	P53_peak_757
6	151558036	151558361	326	151558168	23.66	11.0053	4.93239	6.58509	P53_peak_758
6	152221880	152222070	191	152222050	12.82	8.76553	5.96096	4.52916	P53_peak_759
6	159252935	159253206	272	159253080	22.68	15.0796	7.192	10.4007	P53_peak_760
6	159726728	159727191	464	159726897	12.82	6.6833	4.60563	2.67831	P53_peak_761
6	166347891	166348146	256	166348023	20.7	14.1913	7.2215	9.56227	P53_peak_762
6	170045952	170046172	221	170046061	18.73	14.216	7.80554	9.57951	P53_peak_763
6	170177467	170177770	304	170177612	8.87	5.1443	4.36753	1.41108	P53_peak_764
7	2036214	2036432	219	2036337	20.7	18.5187	9.85078	13.6456	P53_peak_765
7	5427921	5428293	373	5428035	12.82	9.40005	6.38165	5.11162	P53_peak_766
7	6332004	6332259	256	6332129	24.65	20.0257	9.43284	15.0793	P53_peak_767
7	14687941	14688232	292	14688128	13.8	7.53305	4.93427	3.42297	P53_peak_768
7	19235698	19235888	191	19235860	13.8	7.53305	4.93427	3.42297	P53_peak_769
7	26200512	26200861	350	26200674	13.8	10.6468	6.9448	6.25222	P53_peak_770
7	27143621	27143931	311	27143902	10.85	7.45972	5.55717	3.36425	P53_peak_771
7	27144756	27145382	627	27144864	13.8	10.6468	6.9448	6.25222	P53_peak_772
7	27145920	27146346	427	27146010	9.86	6.46796	5.09462	2.49234	P53_peak_773
7	27164265	27164517	253	27164332	9.86	6.41831	5.06018	2.47416	P53_peak_774
7	27168602	27168997	396	27168674	10.85	7.4046	5.5196	3.33093	P53_peak_775
7	27173116	27173332	217	27173226	15.77	12.9238	7.8699	8.37263	P53_peak_776
7	27185074	27185349	276	27185220	12.82	9.55182	6.48226	5.24245	P53_peak_777
7	30310815	30311029	215	30310930	14.79	10.2007	6.39039	5.85081	P53_peak_778
7	30407184	30407394	211	30407281	13.8	9.18928	5.99135	4.92899	P53_peak_779
7	31060093	31060285	193	31060212	16.76	10.2513	5.92019	5.88925	P53_peak_780
7	40134569	40134759	191	40134731	11.83	8.48863	6.01971	4.27378	P53_peak_781
7	40717336	40717626	291	40717468	33.52	34.7454	14.7716	29.2844	P53_peak_782
7	44246413	44246645	233	44246548	14.79	8.41215	5.26291	4.22034	P53_peak_783
7	52184153	52184362	210	52184242	16.76	12.0462	7.02554	7.55526	P53_peak_784
7	56370687	56370934	248	56370794	20.7	19.0502	10.1826	14.1509	P53_peak_785
7	56371630	56372143	514	56371772	48.31	40.3114	12.1573	34.7113	P53_peak_786a
7	56371630	56372143	514	56372010	34.51	17.6571	5.91784	12.8306	P53_peak_786b
7	74079379	74079577	199	74079480	14.79	10.4364	6.54211	6.06189	P53_peak_787
7	80277924	80278212	289	80278081	12.82	7.65203	5.22853	3.53201	P53_peak_788
7	81623303	81623583	281	81623407	12.82	8.69195	5.91224	4.46283	P53_peak_789
7	92048244	92048434	191	92048343	10.85	7.45972	5.55717	3.36425	P53_peak_790
7	100015473	100015725	253	100015629	8.87	5.47258	4.60076	1.68167	P53_peak_791
7	100029661	100029903	243	100029818	16.76	10.2513	5.92019	5.88925	P53_peak_792
7	100827657	100827885	229	100827776	18.73	16.1779	9.03415	11.4348	P53_peak_793
7	102572276	102572774	499	102572474	23.66	7.60524	3.52314	3.48886	P53_peak_794
7	105012657	105012884	228	105012764	10.85	6.45162	4.86951	2.49234	P53_peak_795
7	112584332	112584597	266	112584482	15.77	12.9238	7.8699	8.37263	P53_peak_796
7	114176035	114176243	209	114176145	14.79	11.7714	7.40735	7.3015	P53_peak_797
7	124246531	124246721	191	124246617	13.8	10.6468	6.9448	6.25222	P53_peak_798
7	130373617	130374108	492	130374005	19.72	13.1909	6.9061	8.61665	P53_peak_799
7	134516073	134516267	195	134516163	27.61	12.0029	4.76761	7.5157	P53_peak_800
7	138164755	138165108	354	138164931	32.54	28.0695	11.3016	22.8036	P53_peak_801
7	138431656	138431856	201	138431744	12.82	7.48135	5.11756	3.38525	P53_peak_802
7	139340598	139340809	212	139340692	19.72	10.0802	5.17958	5.7342	P53_peak_803
7	140200167	140200482	316	140200320	36.48	22.5515	7.49577	17.4892	P53_peak_804
7	143379237	143379473	237	143379357	20.7	15.1139	7.76427	10.434	P53_peak_805
7	148402195	148402491	297	148402352	17.75	12.8552	7.25118	8.31454	P53_peak_806
7	148963217	148963407	191	148963344	13.8	6.82164	4.4966	2.80303	P53_peak_807
7	149125907	149126436	530	149126374	11.83	7.44145	5.31656	3.36375	P53_peak_808
7	149793951	149794209	259	149794110	23.66	15.3464	7.08067	10.6419	P53_peak_809
7	150944166	150944356	191	150944253	23.66	16.1014	7.49149	11.3607	P53_peak_810
7	152386396	152386601	206	152386551	14.79	7.37059	4.63475	3.30257	P53_peak_811
7	155481974	155482846	873	155482409	107.46	123.884	27.1162	116.764	P53_peak_812
7	158151314	158151505	192	158151458	26.62	9.529	3.94567	5.23006	P53_peak_813
7	158818566	158819062	497	158818932	28.59	23.7162	10.2361	18.6014	P53_peak_814
8	29770501	29770693	193	29770607	17.75	15.3054	8.79499	10.605	P53_peak_815
8	31172506	31172696	191	31172586	10.85	7.45972	5.55717	3.36425	P53_peak_816
8	37302712	37302941	230	37302833	12.82	8.01451	5.46555	3.86067	P53_peak_817
8	37695515	37695835	321	37695518	9.86	5.31807	4.29555	1.55389	P53_peak_818
8	37697607	37697951	345	37697747	12.82	9.55182	6.48226	5.24245	P53_peak_819
8	37698452	37698687	236	37698589	13.8	10.6468	6.9448	6.25222	P53_peak_820
8	37700361	37700595	235	37700484	14.79	11.6943	7.35729	7.23305	P53_peak_821
8	38369233	38369446	214	38369338	19.72	13.1909	6.9061	8.61665	P53_peak_822
8	43239497	43239811	315	43239709	28.59	7.02967	2.95916	2.99053	P53_peak_823
8	43240664	43240984	321	43240876	28.59	8.09835	3.28795	3.94084	P53_peak_824
8	66113244	66113658	415	66113428	9.86	6.46796	5.09462	2.49234	P53_peak_825
8	101053979	101054231	253	101054113	20.7	14.2141	7.23474	9.57892	P53_peak_826
8	123157173	123157554	382	123157317	18.73	5.85335	3.28873	1.98411	P53_peak_827
8	127795645	127795943	299	127795805	22.68	18.0304	8.89509	13.1822	P53_peak_828
8	133062666	133062960	295	133062725	10.85	6.50822	4.90804	2.52956	P53_peak_829
8	142815813	142816003	191	142815896	15.77	9.6022	5.76448	5.28919	P53_peak_830
8	144522402	144522765	364	144522697	10.85	7.4046	5.5196	3.33093	P53_peak_831
8	144701931	144702129	199	144702025	16.76	12.575	7.35915	8.05353	P53_peak_832
9	25678354	25678552	199	25678442	11.83	8.48863	6.01971	4.27378	P53_peak_833
9	33560244	33560452	209	33560367	11.83	7.50476	5.35897	3.4072	P53_peak_834
9	33621174	33621403	230	33621297	16.76	11.7978	6.86983	7.32318	P53_peak_835
9	41229778	41229968	191	41229857	14.79	7.19779	4.53308	3.1421	P53_peak_836
9	43652153	43652361	209	43652254	13.8	10.6468	6.9448	6.25222	P53_peak_837
9	61856990	61857184	195	61857137	24.65	9.79599	4.27465	5.47092	P53_peak_838
9	65385133	65385323	191	65385258	15.77	12.9238	7.8699	8.37263	P53_peak_839
9	70038275	70038490	216	70038369	51.27	9.47265	2.61338	5.1789	P53_peak_840
9	77981399	77981659	261	77981524	24.65	21.3535	10.2228	16.3435	P53_peak_841
9	84852007	84852347	341	84852130	18.73	7.28745	3.94648	3.22337	P53_peak_842
9	115944115	115944332	218	115944246	17.75	15.3054	8.79499	10.605	P53_peak_843
9	127295072	127295367	296	127295212	26.62	21.6947	9.74722	16.667	P53_peak_844
9	130561147	130561337	191	130561241	15.77	10.2568	6.16942	5.89276	P53_peak_845
9	131633523	131633772	250	131633638	21.69	17.86	9.11324	13.0177	P53_peak_846
9	133882099	133882370	272	133882263	14.79	8.67575	5.42568	4.45123	P53_peak_847
9	136109688	136109950	263	136109815	21.69	19.9268	10.3883	14.9849	P53_peak_848
GL000195.1	86590	86780	191	86696	16.76	10.2513	5.92019	5.88925	P53_peak_849
GL000195.1	138237	138511	275	138326	15.77	6.9063	4.19366	2.87803	P53_peak_850
GL000214.1	119872	120062	191	119961	14.79	8.56218	5.35538	4.34372	P53_peak_851
GL000214.1	120898	121112	215	121017	49.3	17.0858	4.19131	12.2903	P53_peak_852
GL000214.1	123447	123639	193	123532	26.62	18.1672	7.80152	13.3128	P53_peak_853
GL000214.1	124255	124483	229	124391	26.62	9.529	3.94567	5.23006	P53_peak_854
GL000214.1	125313	125504	192	125438	49.3	22.7291	5.58842	17.6578	P53_peak_855
GL000214.1	129104	129689	586	129216	40.42	12.7502	3.76569	8.21698	P53_peak_856a
GL000214.1	129104	129689	586	129562	79.86	50.0368	8.98435	44.2138	P53_peak_856b
GL000214.1	131651	132066	416	131796	37.46	13.7765	4.27387	9.17381	P53_peak_857
GL000214.1	132982	133200	219	133087	24.65	14.5125	6.41197	9.85771	P53_peak_858
GL000216.2	285	903	619	385	48.31	6.88312	2.24136	2.86129	P53_peak_859a
GL000216.2	285	903	619	737	67.04	9.92464	2.34628	5.59236	P53_peak_859b
GL000216.2	1814	2088	275	1991	45.35	12.0057	3.31087	7.51812	P53_peak_860
GL000216.2	5754	6146	393	5848	42.39	11.4509	3.33803	7.00492	P53_peak_861
GL000216.2	80067	80385	319	80235	71.97	12.2561	2.60614	7.74949	P53_peak_862
GL000216.2	142336	142582	247	142478	102.54	33.6184	4.31397	28.1885	P53_peak_863
GL000216.2	149457	149722	266	149594	238.59	37.3327	2.60426	31.8089	P53_peak_864
GL000216.2	159534	159727	194	159616	87.75	18.0017	2.95822	13.1556	P53_peak_865
GL000216.2	160598	160989	392	160750	70	21.8344	3.94444	16.8023	P53_peak_866
GL000216.2	163045	163259	215	163158	84.79	22.5572	3.57453	17.494	P53_peak_867
GL000216.2	166676	166929	254	166792	88.73	15.2049	2.63919	10.5189	P53_peak_868
GL000216.2	168647	168861	215	168754	124.23	45.2938	4.81636	39.5763	P53_peak_869
GL000216.2	171716	171994	279	171842	36.48	20.0324	6.48985	15.0859	P53_peak_870
GL000216.2	173789	173979	191	173886	54.23	13.6809	3.24855	9.08257	P53_peak_871
GL000220.1	101947	102200	254	102091	50.28	23.5351	5.69797	18.4277	P53_peak_872
GL000220.1	118706	118901	196	118804	14.79	10.3567	6.49074	5.98666	P53_peak_873
GL000220.1	119474	121127	1654	119923	111.41	84.5919	12.4898	78.2049	P53_peak_874a
GL000220.1	119474	121127	1654	120450	33.52	10.8289	3.747	6.42483	P53_peak_874b
GL000220.1	119474	121127	1654	120833	102.54	51.962	6.90235	46.1051	P53_peak_874c
GL000220.1	138220	138797	578	138641	82.82	29.754	4.65649	24.4372	P53_peak_875
GL000220.1	140624	140855	232	140738	42.39	31.3703	9.86281	26.0049	P53_peak_876
GL000220.1	141908	142246	339	142110	103.52	58.9368	8.04009	52.9204	P53_peak_877
GL000220.1	142749	143319	571	142910	114.37	43.5509	5.01592	37.875	P53_peak_878
GL000220.1	144766	145293	528	144872	50.28	23.5351	5.69797	18.4277	P53_peak_879a
GL000220.1	144766	145293	528	145168	34.51	19.3692	6.58391	14.4544	P53_peak_879b
GL000220.1	145939	146229	291	146090	33.52	23.5121	8.63028	18.4069	P53_peak_880
GL000224.1	4363	4612	250	4568	29.58	7.58203	3.0648	3.46745	P53_peak_881
GL000224.1	11352	11542	191	11438	15.77	5.31046	3.35493	1.55389	P53_peak_882
GL000225.1	780	972	193	871	17.75	12.2769	6.89462	7.76848	P53_peak_883
GL000225.1	7470	7729	260	7610	28.59	16.2915	6.41913	11.5439	P53_peak_884
GL000225.1	42081	42406	326	42249	44.37	23.6063	6.48089	18.4968	P53_peak_885
GL000225.1	44378	44690	313	44563	35.49	19.1415	6.31913	14.2377	P53_peak_886
GL000225.1	51783	52138	356	51953	73.94	37.8005	6.81306	32.2681	P53_peak_887
GL000225.1	52514	52727	214	52614	25.63	9.46022	4.02603	5.16701	P53_peak_888
GL000225.1	54373	54664	292	54490	22.68	7.74108	3.67441	3.60772	P53_peak_889
GL000225.1	57078	57900	823	57264	43.38	22.7298	6.34004	17.6578	P53_peak_890a
GL000225.1	57078	57900	823	57541	19.72	8.00567	4.15039	3.85645	P53_peak_890b
GL000225.1	57078	57900	823	57814	19.72	7.87228	4.08782	3.73128	P53_peak_890c
GL000225.1	58939	59168	230	59060	22.68	9.89053	4.58501	5.55992	P53_peak_891
GL000225.1	61363	61553	191	61514	28.59	9.36461	3.69894	5.07743	P53_peak_892
GL000225.1	62344	62620	277	62498	44.37	23.6063	6.48089	18.4968	P53_peak_893
GL000225.1	64934	65196	263	65057	51.27	25.3821	6.08988	20.2059	P53_peak_894
GL000225.1	65535	65771	237	65655	59.15	31.1482	6.68388	25.7916	P53_peak_895
GL000225.1	67402	67606	205	67509	139.01	12.0646	1.918	7.57288	P53_peak_896
GL000225.1	70794	71372	579	70923	97.61	17.6678	2.73905	12.8402	P53_peak_897a
GL000225.1	70794	71372	579	71175	109.44	22.4729	2.98477	17.4139	P53_peak_897b
GL000225.1	73875	74086	212	73984	73.94	18.6537	3.40653	13.7762	P53_peak_898
GL000225.1	78703	79272	570	78963	42.39	24.8447	7.23239	19.6864	P53_peak_899
GL000225.1	80629	80844	216	80750	30.56	14.4227	5.29054	9.77345	P53_peak_900
GL000225.1	83035	83232	198	83140	30.56	12.3086	4.50905	7.79883	P53_peak_901
GL000225.1	90831	91299	469	90957	43.38	13.2598	3.69836	8.68254	P53_peak_902a
GL000225.1	90831	91299	469	91231	29.58	10.0007	3.82218	5.66095	P53_peak_902b
GL000225.1	92605	92881	277	92734	51.27	14.2559	3.48451	9.61779	P53_peak_903
GL000225.1	95474	95664	191	95568	26.62	10.4726	4.29919	6.09721	P53_peak_904
GL000225.1	99229	99463	235	99352	130.14	37.2098	3.85708	31.6879	P53_peak_905
GL000225.1	101494	101717	224	101609	41.41	26.9691	8.24313	21.7346	P53_peak_906
GL000225.1	104059	104298	240	104188	29.58	7.55824	3.05775	3.44555	P53_peak_907
GL000225.1	110275	110473	199	110452	58.17	11.8928	2.81757	7.41021	P53_peak_908
GL000225.1	111497	111813	317	111592	52.25	11.6376	2.95853	7.17977	P53_peak_909
GL000225.1	112362	112564	203	112489	74.93	21.6154	3.79648	16.5936	P53_peak_910
GL000225.1	115017	115261	245	115138	36.48	14.4179	4.55959	9.76883	P53_peak_911
GL000225.1	125697	126003	307	125923	80.85	13.9491	2.64016	9.33739	P53_peak_912
GL000225.1	131632	131837	206	131728	117.32	13.97	2.19118	9.35754	P53_peak_913
GL000225.1	133692	133882	191	133784	133.1	22.1524	2.62938	17.1062	P53_peak_914
GL000225.1	134860	135160	301	134995	67.04	26.2018	4.86016	20.9937	P53_peak_915
KI270333.1	116	464	349	353	106.48	23.7818	3.16114	18.6642	P53_peak_916
KI270333.1	878	1247	370	1066	98.59	6.86976	1.74722	2.84828	P53_peak_917
KI270333.1	1956	2147	192	2061	75.92	15.7201	2.95829	10.9985	P53_peak_918
KI270333.1	2427	2648	222	2527	56.2	17.2393	3.81315	12.4378	P53_peak_919
KI270336.1	782	977	196	874	84.79	14.2091	2.59966	9.57864	P53_peak_920
KI270337.1	1	540	540	134	77.89	14.9534	2.8174	10.2806	P53_peak_921a
KI270337.1	1	540	540	535	58.17	5.1006	1.81975	1.37117	P53_peak_921b
KI270337.1	728	923	196	834	133.1	16.381	2.23498	11.6245	P53_peak_922
KI270435.1	91927	92134	208	92024	24.65	11.8043	5.12958	7.32785	P53_peak_923
KI270438.1	101404	101653	250	101545	53.24	18.1928	4.17226	13.3376	P53_peak_924
KI270438.1	101832	102247	416	101921	51.27	11.1401	2.90376	6.71393	P53_peak_925a
KI270438.1	101832	102247	416	102171	45.35	9.98974	2.89701	5.6505	P53_peak_925b
KI270438.1	103929	104384	456	104056	252.39	44.9835	2.81549	39.2746	P53_peak_926a
KI270438.1	103929	104384	456	104316	118.31	13.0671	2.1158	8.50823	P53_peak_926b
KI270438.1	104603	105045	443	104882	177.46	37.7754	3.13096	32.2444	P53_peak_927
KI270438.1	105527	106378	852	105816	78.87	16.536	2.98841	11.7661	P53_peak_928a
KI270438.1	105527	106378	852	106271	63.1	8.9921	2.28924	4.74274	P53_peak_928b
KI270438.1	109208	110042	835	109422	254.37	28.2056	2.18262	22.9356	P53_peak_929a
KI270438.1	109208	110042	835	109883	269.15	36.565	2.4121	31.0612	P53_peak_929b
KI270438.1	110371	110619	249	110504	212.96	52.1725	3.5075	46.3095	P53_peak_930
KI270438.1	112011	112443	433	112206	214.93	36.5471	2.73329	31.0449	P53_peak_931
KI270465.1	850	1201	352	1069	14.79	10.7675	6.75598	6.36527	P53_peak_932
KI270466.1	256	580	325	449	172.54	32.6541	2.89225	27.2563	P53_peak_933
KI270466.1	891	1160	270	1038	180.42	16.6352	1.99365	11.8594	P53_peak_934
KI270467.1	2042	3867	1826	2345	246.48	16.3531	1.78042	11.5973	P53_peak_935a
KI270467.1	2042	3867	1826	2778	177.46	9.76821	1.65893	5.44617	P53_peak_935b
KI270467.1	2042	3867	1826	3144	198.17	21.3626	2.13579	16.3524	P53_peak_935c
KI270467.1	2042	3867	1826	3387	196.2	11.6131	1.69998	7.15682	P53_peak_935d
KI270467.1	2042	3867	1826	3762	125.21	22.2155	2.72789	17.1665	P53_peak_935e
KI270538.1	53723	54034	312	53768	23.66	7.60524	3.52314	3.48886	P53_peak_936
KI270538.1	81209	81536	328	81395	49.3	10.1695	2.79421	5.82113	P53_peak_937
KI270538.1	88707	88938	232	88844	26.62	6.0158	2.76197	2.12072	P53_peak_938
KI270709.1	3576	3859	284	3737	125.21	44.2809	4.67449	38.587	P53_peak_939
KI270709.1	5496	5691	196	5595	112.39	18.237	2.57714	13.3798	P53_peak_940
KI270709.1	6696	6905	210	6807	126.2	33.6135	3.63421	28.184	P53_peak_941
KI270709.1	7190	7640	451	7475	198.17	42.6754	3.16141	37.0238	P53_peak_942
KI270709.1	13796	14017	222	13909	155.77	39.5884	3.56306	34.0073	P53_peak_943
KI270713.1	21740	22128	389	21854	24.65	15.8373	7.09152	11.1123	P53_peak_944
KI270723.1	34188	34485	298	34369	17.75	10.8646	6.0453	6.45782	P53_peak_945
KI270723.1	35206	35466	261	35321	48.31	30.6604	8.21831	25.3167	P53_peak_946
KI270724.1	516	871	356	724	34.51	7.28108	2.73131	3.21879	P53_peak_947
KI270724.1	2749	3105	357	2922	18.73	15.5772	8.6557	10.8607	P53_peak_948
KI270728.1	232599	232862	264	232749	38.45	16.3077	4.93134	11.557	P53_peak_949
KI270728.1	1791469	1791718	250	1791595	41.41	27.556	8.48169	22.3058	P53_peak_950
KI270728.1	1792250	1792704	455	1792528	21.69	11.7967	5.67254	7.32262	P53_peak_951
KI270729.1	954	1163	210	1046	154.79	13.5535	1.94736	8.9623	P53_peak_952
KI270729.1	1470	1730	261	1516	45.35	6.65007	2.26307	2.65922	P53_peak_953
KI270729.1	2729	3723	995	3132	85.77	12.8512	2.43948	8.31131	P53_peak_954a
KI270729.1	2729	3723	995	3563	124.23	9.04518	1.78893	4.79224	P53_peak_954b
KI270729.1	22430	22670	241	22539	109.44	11.7523	2.08371	7.28942	P53_peak_955
KI270729.1	24611	24809	199	24707	131.13	11.3818	1.91488	6.93835	P53_peak_956
KI270730.1	103366	103596	231	103524	14.79	9.97494	6.24554	5.63681	P53_peak_957
KI270733.1	119023	119229	207	119122	17.75	15.3054	8.79499	10.605	P53_peak_958
KI270733.1	124181	124455	275	124312	29.58	31.2894	14.3455	25.9269	P53_peak_959
KI270733.1	124647	125014	368	124783	21.69	20.34	10.6452	15.3776	P53_peak_960
KI270733.1	127901	128149	249	128046	12.82	9.55182	6.48226	5.24245	P53_peak_961
KI270733.1	128386	128870	485	128517	25.63	25.6835	12.4954	20.4935	P53_peak_962
KI270733.1	129901	130257	357	130087	83.8	122.499	39.7856	115.409	P53_peak_963
KI270733.1	134858	136650	1793	135129	114.37	120.951	23.0732	113.91	P53_peak_964a
KI270733.1	134858	136650	1793	135412	56.2	42.863	10.9952	37.205	P53_peak_964b
KI270733.1	134858	136650	1793	135710	125.21	115.913	18.0302	108.985	P53_peak_964c
KI270733.1	134858	136650	1793	136073	88.73	59.2767	9.97027	53.2523	P53_peak_964d
KI270733.1	138207	138884	678	138460	29.58	19.1514	7.53882	14.2469	P53_peak_965a
KI270733.1	138207	138884	678	138762	42.39	21.0711	5.94199	16.0743	P53_peak_965b
KI270733.1	139055	139661	607	139218	56.2	21.9347	4.76643	16.8958	P53_peak_966
KI270733.1	141532	141780	249	141629	43.38	25.7904	7.39671	20.5984	P53_peak_967
KI270733.1	142826	143041	216	142930	22.68	12.6839	5.91901	8.153	P53_peak_968
KI270733.1	143362	144796	1435	143462	19.72	10.4247	5.36049	6.05139	P53_peak_969a
KI270733.1	143362	144796	1435	143739	14.79	6.52791	4.14653	2.54833	P53_peak_969b
KI270733.1	143362	144796	1435	144054	22.68	10.2238	4.73521	5.87041	P53_peak_969c
KI270733.1	143362	144796	1435	144427	24.65	16.2759	7.32357	11.529	P53_peak_969d
KI270733.1	143362	144796	1435	144707	17.75	6.60524	3.7493	2.61757	P53_peak_969e
KI270733.1	145080	145521	442	145470	20.7	12.317	6.16387	7.80704	P53_peak_970
KI270733.1	145713	146042	330	145908	29.58	16.5639	6.34387	11.7925	P53_peak_971
KI270733.1	146338	147087	750	146812	20.7	10.9285	5.42606	6.51535	P53_peak_972
KI270733.1	147349	147846	498	147688	29.58	13.5501	5.09624	8.95977	P53_peak_973
KI270733.1	148251	148702	452	148590	18.73	5.85335	3.28873	1.98411	P53_peak_974
KI270733.1	149308	149592	285	149377	19.72	7.64613	3.98276	3.52633	P53_peak_975
KI270733.1	150051	150870	820	150419	19.72	10.2762	5.28218	5.91091	P53_peak_976a
KI270733.1	150051	150870	820	150738	20.7	11.0331	5.48017	6.61145	P53_peak_976b
KI270733.1	151032	151696	665	151174	22.68	12.8567	6.00702	8.31559	P53_peak_977a
KI270733.1	151032	151696	665	151405	19.72	7.99138	4.14366	3.84243	P53_peak_977b
KI270733.1	151032	151696	665	151568	17.75	8.75203	4.85032	4.5172	P53_peak_977c
KI270733.1	152006	152350	345	152167	29.58	20.7311	8.32266	15.7506	P53_peak_978
KI270733.1	153394	153930	537	153455	13.8	6.41151	4.25002	2.47237	P53_peak_979a
KI270733.1	153394	153930	537	153777	61.13	56.724	15.3172	50.7538	P53_peak_979b
KI270733.1	154116	154337	222	154224	33.52	24.0451	8.88781	18.9185	P53_peak_980
KI270733.1	154683	155231	549	154776	32.54	14.3284	4.98294	9.68498	P53_peak_981a
KI270733.1	154683	155231	549	155113	58.17	21.5854	4.55146	16.5645	P53_peak_981b
KI270733.1	155552	155852	301	155686	62.11	28.5666	5.73752	23.2849	P53_peak_982
KI270733.1	158580	158881	302	158721	115.35	44.2738	5.05879	38.5806	P53_peak_983
KI270733.1	160089	160304	216	160194	38.45	12.8929	3.94507	8.34981	P53_peak_984
KI270733.1	161682	162311	630	161813	29.58	11.7319	4.41807	7.26946	P53_peak_985a
KI270733.1	161682	162311	630	162134	126.2	73.9506	8.47981	67.7101	P53_peak_985b
KI270733.1	162726	163215	490	162836	37.46	17.6823	5.49497	12.8525	P53_peak_986a
KI270733.1	162726	163215	490	163118	26.62	15.5838	6.50335	10.8671	P53_peak_986b
KI270733.1	164333	164797	465	164589	68.03	25.1341	4.60188	19.968	P53_peak_987
KI270733.1	164957	165351	395	165210	54.23	36.7913	9.20423	31.281	P53_peak_988
KI270733.1	166472	166855	384	166680	61.13	63.7151	18.6556	57.6182	P53_peak_989
KI270733.1	167458	167679	222	167571	25.63	21.2065	9.79544	16.2039	P53_peak_990
KI270733.1	167993	168306	314	168145	57.18	51.9784	14.5458	46.1192	P53_peak_991
KI270733.1	168692	169208	517	168937	127.18	74.912	8.54554	68.656	P53_peak_992
KI270733.1	169702	170190	489	169958	121.27	195.4	56.472	186.386	P53_peak_993
KI270733.1	170839	171052	214	170936	17.75	15.3054	8.79499	10.605	P53_peak_994
KI270733.1	172985	173453	469	173236	117.32	105.432	16.9034	98.7037	P53_peak_995
KI270733.1	174963	175355	393	175170	82.82	100.469	27.939	93.8301	P53_peak_996
KI270734.1	121423	121637	215	121537	52.25	22.8859	5.32535	17.8081	P53_peak_997
KI270735.1	39706	39905	200	39815	95.63	12.7389	2.3008	8.20637	P53_peak_998
KI270735.1	40834	41072	239	40952	112.39	18.9634	2.63708	14.0711	P53_peak_999
KI270736.1	179414	179806	393	179564	17.75	13.1195	7.41554	8.55599	P53_peak_1000
KI270736.1	181344	181553	210	181404	23.66	7.21655	3.37696	3.15999	P53_peak_1001
KI270744.1	11118	11330	213	11210	67.04	17.5518	3.40211	12.732	P53_peak_1002
KI270744.1	13273	13624	352	13325	33.52	9.80686	3.45211	5.48082	P53_peak_1003a
KI270744.1	13273	13624	352	13515	34.51	7.28108	2.73131	3.21879	P53_peak_1003b
KI270744.1	108167	108358	192	108260	22.68	7.44925	3.55838	3.36425	P53_peak_1004
KI270744.1	118862	119053	192	118981	26.62	9.529	3.94567	5.23006	P53_peak_1005
KI270744.1	119769	120281	513	119874	35.49	8.70635	3.04108	4.47602	P53_peak_1006a
KI270744.1	119769	120281	513	120199	45.35	19.5466	5.13768	14.6244	P53_peak_1006b
KI270744.1	120662	120981	320	120853	42.39	10.377	3.0996	6.00621	P53_peak_1007
KI270744.1	122548	122769	222	122654	31.55	15.1537	5.42488	10.4704	P53_peak_1008
KI270744.1	125017	125207	191	125145	22.68	15.0796	7.192	10.4007	P53_peak_1009
KI270754.1	18062	18351	290	18212	77.89	41.3383	7.17158	35.7128	P53_peak_1010
KI270754.1	20479	21250	772	20601	41.41	34.3404	11.5429	28.8912	P53_peak_1011a
KI270754.1	20479	21250	772	21149	15.77	10.9976	6.63554	6.57921	P53_peak_1011b
KI270754.1	32789	33233	445	32975	19.72	13.1909	6.9061	8.61665	P53_peak_1012
KI270754.1	39146	39337	192	39248	38.45	10.3343	3.28756	5.9657	P53_peak_1013
KI270757.1	61157	61384	228	61232	10.85	5.08049	3.94836	1.35493	P53_peak_1014
KI270757.1	61531	61860	330	61704	16.76	9.36414	5.39507	5.07743	P53_peak_1015
X	323506	323764	259	323609	14.79	7.19779	4.53308	3.1421	P53_peak_1016
X	18793750	18793956	207	18793818	15.77	9.31879	5.59155	5.03463	P53_peak_1017
X	21839452	21839653	202	21839623	14.79	10.6828	6.70122	6.28602	P53_peak_1018
X	30798816	30799024	209	30798926	8.87	5.24983	4.4426	1.50732	P53_peak_1019
X	40966044	40966330	287	40966178	27.61	17.3804	7.15141	12.5695	P53_peak_1020
X	41192975	41193177	203	41193072	16.76	12.9541	7.59973	8.39888	P53_peak_1021
X	42976726	42976975	250	42976864	16.76	10.2513	5.92019	5.88925	P53_peak_1022
X	44675438	44675639	202	44675542	12.82	9.15197	6.21711	4.8932	P53_peak_1023
X	52921104	52921419	316	52921293	9.86	6.41831	5.06018	2.47416	P53_peak_1024
X	63404285	63404631	347	63404485	17.75	15.3054	8.79499	10.605	P53_peak_1025
X	72271885	72272190	306	72272011	26.62	20.7457	9.20657	15.7613	P53_peak_1026
X	73851037	73851603	567	73851159	20.7	18.2495	9.6829	13.3914	P53_peak_1027a
X	73851037	73851603	567	73851436	17.75	14.6252	8.36336	9.96574	P53_peak_1027b
X	73944135	73944381	247	73944241	17.75	13.5849	7.70667	8.99213	P53_peak_1028
X	108313062	108313307	246	108313183	18.73	9.25272	4.9331	4.98355	P53_peak_1029
X	115679539	115679765	227	115679648	19.72	13.3206	6.98221	8.74145	P53_peak_1030
X	115726530	115726733	204	115726622	24.65	11.8043	5.12958	7.32785	P53_peak_1031
X	115727252	115727453	202	115727345	25.63	23.8848	11.3966	18.7627	P53_peak_1032
X	115727852	115728254	403	115727985	26.62	26.9186	12.8703	21.6877	P53_peak_1033
X	115732380	115732825	446	115732536	85.77	48.6743	7.8886	42.8816	P53_peak_1034
X	115854461	115854653	193	115854557	15.77	12.9238	7.8699	8.37263	P53_peak_1035
X	115884230	115884425	196	115884330	20.7	19.0502	10.1826	14.1509	P53_peak_1036
X	119943700	119943901	202	119943804	23.66	18.9703	9.1344	14.0775	P53_peak_1037
X	156030480	156030737	258	156030616	42.39	33.5372	10.8486	28.1107	P53_peak_1038
Y	11293525	11294074	550	11293631	20.7	7.13932	3.63799	3.08903	P53_peak_1039a
Y	11293525	11294074	550	11293880	17.75	5.08811	3.04474	1.36206	P53_peak_1039b
Y	11295615	11295820	206	11295670	23.66	6.41011	3.08275	2.47237	P53_peak_1040
Y	11305297	11305575	279	11305389	88.73	11.3064	2.24331	6.86593	P53_peak_1041
Y	11312479	11312675	197	11312577	133.1	18.7513	2.39462	13.8697	P53_peak_1042
Y	11314744	11314966	223	11314856	43.38	14.6592	4.03457	9.99795	P53_peak_1043
Y	11318674	11319026	353	11318764	89.72	18.0873	2.9264	13.2367	P53_peak_1044a
Y	11318674	11319026	353	11319000	33.52	6.33486	2.5372	2.40464	P53_peak_1044b
Y	11320764	11320983	220	11320881	42.39	15.5586	4.33944	10.8435	P53_peak_1045
Y	11322494	11322803	310	11322655	50.28	26.0681	6.41021	20.8635	P53_peak_1046
Y	11323330	11323549	220	11323437	30.56	13.5049	4.94244	8.91661	P53_peak_1047
Y	11332014	11332205	192	11332116	31.55	13.8771	4.94881	9.26817	P53_peak_1048
Y	11332725	11333588	864	11332941	33.52	18.2437	6.31169	13.3864	P53_peak_1049a
Y	11332725	11333588	864	11333155	38.45	14.4299	4.37272	9.78027	P53_peak_1049b
Y	11332725	11333588	864	11333469	83.8	30.4491	4.71127	25.1098	P53_peak_1049c
Y	11333763	11334328	566	11333920	66.06	29.3172	5.55194	24.017	P53_peak_1050a
Y	11333763	11334328	566	11334201	42.39	19.4071	5.4243	14.4896	P53_peak_1050b
Y	56830836	56831072	237	56830961	23.66	12.4008	5.58102	7.88802	P53_peak_1051
Y	56832375	56833059	685	56832500	23.66	7.60524	3.52314	3.48886	P53_peak_1052a
Y	56832375	56833059	685	56832695	18.73	6.67433	3.65889	2.67831	P53_peak_1052b
Y	56834266	56834456	191	56834398	28.59	9.81348	3.85056	5.48702	P53_peak_1053
Y	56836580	56837029	450	56836796	26.62	14.279	5.89372	9.63972	P53_peak_1054
Y	56866407	56866694	288	56866554	13.8	7.22669	4.74434	3.16981	P53_peak_1055
