# Supplementary material for: NOLC1 suppresses immunochemotherapy by inhibiting p53-mediated ferroptosis in gastric cancer
Source: eLife. 2025 Aug 27;13:RP103904. doi: 10.7554/eLife.103904 (PMC12387760; doi:10.7554/eLife.103904)
Supplement: Source data 2. [file elife-103904-data2.xlsx]

## Sheet: Sheet1
# This file is generated by MACS version 2.2.7.1
# Command line: callpeak -t ../../Mapping/P53_nolc_IP/P53_nolc_IP.final.bam -c ../../Mapping/P53_nolc_Input/P53_nolc_Input.final.bam -g 3099750718 -f AUTO -n P53_nolc -B -p 0.005 --call-summits --nomodel --extsize 187
# ARGUMENTS LIST:
# name = P53_nolc
# format = AUTO
# ChIP-seq file = ['../../Mapping/P53_nolc_IP/P53_nolc_IP.final.bam']
# control file = ['../../Mapping/P53_nolc_Input/P53_nolc_Input.final.bam']
# effective genome size = 3.10e+09
# band width = 300
# model fold = [5, 50]
# pvalue cutoff = 5.00e-03
# qvalue will not be calculated and reported as -1 in the final output.
# The maximum gap between significant sites is assigned as the read length/tag size.
# The minimum length of peaks is assigned as the predicted fragment length "d".
# Larger dataset will be scaled towards smaller dataset.
# Range for calculating regional lambda is: 1000 bps and 10000 bps
# Broad region calling is off
# Paired-End mode is off
# Searching for subpeak summits is on
# tag size is determined as 139 bps
# total tags in treatment: 20059375
# tags after filtering in treatment: 19732937
# maximum duplicate tags at the same position in treatment = 1
# Redundant rate in treatment: 0.02
# total tags in control: 8801539
# tags after filtering in control: 8512600
# maximum duplicate tags at the same position in control = 1
# Redundant rate in control: 0.03
# d = 187
chr	start	end	length	abs_summit	pileup	#NAME?	fold_enrichment	#NAME?	name
1	10024	10444	421	10150	9.06	6.95302	5.0296	1.92273	P53_nolc_peak_1
1	183604	183913	310	183667	3.88	2.5268	3.09079	0	P53_nolc_peak_2
1	918472	918658	187	918564	3.88	2.62991	3.16574	0	P53_nolc_peak_3
1	2697443	2697629	187	2697526	8.63	5.94877	4.8139	1.05594	P53_nolc_peak_4
1	8367550	8367760	211	8367659	6.47	5.23861	4.51548	0.561742	P53_nolc_peak_5
1	9181991	9182258	268	9182175	11.65	5.7411	4.13724	0.991437	P53_nolc_peak_6
1	11908041	11908259	219	11908155	4.75	2.41881	2.85864	0	P53_nolc_peak_7
1	12618334	12618582	249	12618442	12.51	6.6833	4.50344	1.71044	P53_nolc_peak_8
1	12619153	12619437	285	12619277	3.88	2.71475	3.22588	0	P53_nolc_peak_9
1	13808853	13809045	193	13808962	6.47	4.86783	4.27395	0.251826	P53_nolc_peak_10
1	16513839	16514267	429	16514131	5.61	3.77702	3.70117	0	P53_nolc_peak_11
1	16545870	16546096	227	16545976	9.06	7.29985	5.24928	2.17843	P53_nolc_peak_12
1	16605125	16605351	227	16605192	4.75	2.67407	3.0578	0	P53_nolc_peak_13
1	16896100	16896411	312	16896255	7.77	4.68714	4.16727	0.183921	P53_nolc_peak_14
1	18922533	18922719	187	18922618	3.88	2.71475	3.22588	0	P53_nolc_peak_15
1	18922972	18923170	199	18923072	3.88	2.68449	3.20459	0	P53_nolc_peak_16
1	27543038	27543224	187	27543126	6.9	4.60618	4.33522	0.117523	P53_nolc_peak_17
1	33470728	33470939	212	33470839	4.75	3.71098	3.79592	0	P53_nolc_peak_18
1	35268395	35268694	300	35268487	3.45	2.43091	2.75253	0	P53_nolc_peak_19
1	38246956	38247176	221	38247074	5.18	4.78414	4.08094	0.189606	P53_nolc_peak_20
1	40257918	40258182	265	40257987	4.75	2.52314	2.94073	0	P53_nolc_peak_21
1	41006887	41007198	312	41007092	4.31	3.536	3.40417	0	P53_nolc_peak_22
1	42192220	42192416	197	42192312	4.75	3.71098	3.79592	0	P53_nolc_peak_23
1	42456306	42456593	288	42456490	5.18	4.2727	3.77594	0	P53_nolc_peak_24
1	44213264	44213531	268	44213421	7.77	4.98931	4.38251	0.344917	P53_nolc_peak_25
1	45349232	45349418	187	45349291	3.88	2.478	3.05463	0	P53_nolc_peak_26
1	47820325	47820528	204	47820407	5.18	4.73731	4.05401	0.189606	P53_nolc_peak_27
1	51804425	51805159	735	51804527	5.61	4.41691	4.13418	0	P53_nolc_peak_28a
1	51804425	51805159	735	51804891	3.88	2.3854	2.98479	0	P53_nolc_peak_28b
1	58780378	58780643	266	58780495	4.31	3.47147	3.36387	0	P53_nolc_peak_29
1	61141679	61141866	188	61141717	3.88	2.5268	3.09079	0	P53_nolc_peak_30
1	67367067	67367265	199	67367163	6.47	4.07966	3.73543	0	P53_nolc_peak_31
1	67686507	67686943	437	67686786	15.1	16.9269	9.95527	10.9252	P53_nolc_peak_32
1	67832107	67832293	187	67832192	4.31	3.536	3.40417	0	P53_nolc_peak_33
1	69055283	69055547	265	69055430	5.61	4.78414	4.36596	0.189606	P53_nolc_peak_34
1	70205367	70205622	256	70205529	4.75	3.18007	3.43372	0	P53_nolc_peak_35
1	72000857	72001105	249	72000996	6.9	5.92283	5.22102	1.05432	P53_nolc_peak_36
1	73411727	73411913	187	73411821	3.45	2.71475	2.94086	0	P53_nolc_peak_37
1	74160082	74160337	256	74160195	6.47	5.92283	4.936	1.05432	P53_nolc_peak_38
1	74733108	74733300	193	74733245	5.18	3.22608	3.08834	0	P53_nolc_peak_39
1	75092197	75092439	243	75092311	4.75	2.43654	2.87265	0	P53_nolc_peak_40
1	75135341	75135547	207	75135476	3.45	2.3854	2.72107	0	P53_nolc_peak_41
1	76191118	76191350	233	76191235	6.04	4.07966	3.51973	0	P53_nolc_peak_42
1	76419527	76419766	240	76419613	3.45	2.71475	2.94086	0	P53_nolc_peak_43
1	78005861	78006055	195	78005968	4.75	3.47147	3.63695	0	P53_nolc_peak_44
1	80217562	80217842	281	80217687	6.9	5.67202	5.0623	0.925403	P53_nolc_peak_45
1	81808946	81809160	215	81809025	3.02	2.71475	2.65584	0	P53_nolc_peak_46
1	81874459	81874832	374	81874623	23.73	24.8828	12.7785	18.2731	P53_nolc_peak_47
1	81880600	81880840	241	81880739	3.45	2.43091	2.75253	0	P53_nolc_peak_48
1	81926614	81926800	187	81926705	3.45	2.71475	2.94086	0	P53_nolc_peak_49
1	82226229	82226489	261	82226342	7.77	4.98931	4.38251	0.344917	P53_nolc_peak_50
1	85274931	85275127	197	85275020	4.75	2.59681	2.99812	0	P53_nolc_peak_51
1	88061109	88061365	257	88061239	7.77	7.11857	5.79107	2.01982	P53_nolc_peak_52
1	88683974	88684160	187	88684025	4.31	2.55954	2.7462	0	P53_nolc_peak_53
1	88801937	88802160	224	88802054	9.06	8.1152	5.75469	2.89994	P53_nolc_peak_54
1	90504672	90504943	272	90504858	4.31	3.71098	3.5109	0	P53_nolc_peak_55
1	92831882	92832256	375	92832237	5.61	3.47016	3.48233	0	P53_nolc_peak_56
1	93847503	93847788	286	93847555	4.31	2.79744	2.91524	0	P53_nolc_peak_57
1	93879148	93879458	311	93879249	4.75	2.43654	2.87265	0	P53_nolc_peak_58
1	94836966	94837243	278	94837112	8.63	6.25802	5.02417	1.3301	P53_nolc_peak_59
1	97710712	97710920	209	97710806	3.88	2.71475	3.22588	0	P53_nolc_peak_60
1	99573541	99573751	211	99573637	3.88	2.71475	3.22588	0	P53_nolc_peak_61
1	100133043	100133299	257	100133193	5.61	3.37746	3.41503	0	P53_nolc_peak_62
1	100363036	100363404	369	100363128	4.31	3.71098	3.5109	0	P53_nolc_peak_63
1	100463773	100464028	256	100463897	3.45	2.34139	2.69031	0	P53_nolc_peak_64
1	101526854	101527040	187	101526953	5.18	4.78414	4.08094	0.189606	P53_nolc_peak_65
1	103387537	103387723	187	103387589	3.02	2.62991	2.60632	0	P53_nolc_peak_66
1	105498925	105499111	187	105498984	3.02	2.71475	2.65584	0	P53_nolc_peak_67
1	106886294	106886499	206	106886383	4.75	3.71098	3.79592	0	P53_nolc_peak_68
1	107765956	107766170	215	107766055	3.45	2.71475	2.94086	0	P53_nolc_peak_69
1	108746398	108746635	238	108746521	5.18	3.83295	3.49617	0	P53_nolc_peak_70
1	109198006	109198251	246	109198153	6.04	4.42671	3.74659	0	P53_nolc_peak_71
1	109214250	109214458	209	109214331	6.9	3.77533	3.72396	0	P53_nolc_peak_72
1	109911489	109911704	216	109911566	5.18	3.22608	3.08834	0	P53_nolc_peak_73
1	112687467	112687685	219	112687579	11.65	7.6679	5.39019	2.51107	P53_nolc_peak_74
1	112703820	112704015	196	112703920	6.47	4.42671	3.97619	0	P53_nolc_peak_75
1	114155304	114155490	187	114155392	3.45	2.43091	2.75253	0	P53_nolc_peak_76
1	115839162	115839511	350	115839365	15.53	17.5663	10.5894	11.5115	P53_nolc_peak_77
1	115877558	115877770	213	115877670	8.2	6.33137	4.84634	1.39696	P53_nolc_peak_78
1	116879193	116879439	247	116879317	9.92	6.95302	5.46099	1.92273	P53_nolc_peak_79
1	117148032	117148218	187	117148084	3.45	2.71475	2.94086	0	P53_nolc_peak_80
1	119140531	119140783	253	119140659	5.18	4.78414	4.08094	0.189606	P53_nolc_peak_81
1	120176281	120176701	421	120176570	9.49	6.95302	5.24529	1.92273	P53_nolc_peak_82
1	144104302	144104503	202	144104448	13.37	4.11731	2.87462	0	P53_nolc_peak_83
1	144567521	144567846	326	144567648	4.31	3.71098	3.5109	0	P53_nolc_peak_84
1	145157063	145157264	202	145157183	4.31	3.71098	3.5109	0	P53_nolc_peak_85
1	145280686	145280872	187	145280791	4.75	3.71098	3.79592	0	P53_nolc_peak_86
1	145281021	145281953	933	145281295	6.47	5.92283	4.936	1.05432	P53_nolc_peak_87a
1	145281021	145281953	933	145281572	3.88	2.71475	3.22588	0	P53_nolc_peak_87b
1	145281021	145281953	933	145281811	5.18	3.22608	3.08834	0	P53_nolc_peak_87c
1	145287577	145287879	303	145287752	8.2	5.94877	4.59821	1.05594	P53_nolc_peak_88
1	145979063	145979402	340	145979183	6.47	4.07966	3.73543	0	P53_nolc_peak_89
1	146035605	146035802	198	146035701	12.51	6.13067	4.16471	1.22354	P53_nolc_peak_90
1	146036971	146037202	232	146037091	5.61	2.35657	2.64747	0	P53_nolc_peak_91
1	146376857	146377409	553	146376982	8.63	5.54603	4.53714	0.83354	P53_nolc_peak_92
1	146387281	146387658	378	146387604	4.31	3.23459	3.21179	0	P53_nolc_peak_93
1	147928321	147928507	187	147928451	3.88	2.57739	3.12781	0	P53_nolc_peak_94
1	148038706	148038916	211	148038815	5.18	4.34361	3.81961	0	P53_nolc_peak_95
1	148388920	148389411	492	148389040	3.88	2.478	3.05463	0	P53_nolc_peak_96
1	148522639	148523060	422	148522959	6.47	4.07966	3.73543	0	P53_nolc_peak_97
1	148529077	148529343	267	148529241	5.61	4.78414	4.36596	0.189606	P53_nolc_peak_98
1	149813380	149813569	190	149813514	4.31	3.71098	3.5109	0	P53_nolc_peak_99
1	151058764	151059108	345	151058938	5.18	3.66951	3.38857	0	P53_nolc_peak_100
1	152167740	152168012	273	152167881	3.88	2.71475	3.22588	0	P53_nolc_peak_101
1	152214495	152214681	187	152214618	4.31	3.71098	3.5109	0	P53_nolc_peak_102
1	153526195	153526427	233	153526293	7.33	2.9599	2.77788	0	P53_nolc_peak_103
1	153671184	153671370	187	153671274	9.06	5.21478	3.91287	0.540674	P53_nolc_peak_104
1	154391350	154391566	217	154391431	8.2	4.21389	3.45172	0	P53_nolc_peak_105
1	155244794	155245109	316	155244879	6.47	2.34354	2.49029	0	P53_nolc_peak_106
1	155262211	155262397	187	155262301	6.04	4.73356	3.94279	0.189606	P53_nolc_peak_107
1	156741192	156741378	187	156741292	8.63	5.54603	4.53714	0.83354	P53_nolc_peak_108
1	158177637	158177825	189	158177727	4.31	3.71098	3.5109	0	P53_nolc_peak_109
1	158735036	158735338	303	158735082	3.02	2.71475	2.65584	0	P53_nolc_peak_110
1	160031914	160032156	243	160032006	3.88	2.43091	3.0193	0	P53_nolc_peak_111
1	160261959	160262295	337	160262030	4.75	2.43654	2.87265	0	P53_nolc_peak_112
1	160343164	160343569	406	160343477	6.04	5.00971	4.1152	0.36153	P53_nolc_peak_113
1	161074769	161074974	206	161074923	6.04	3.81944	3.34687	0	P53_nolc_peak_114
1	161159117	161159452	336	161159160	3.45	2.3854	2.72107	0	P53_nolc_peak_115
1	161399371	161399824	454	161399674	8.63	5.43232	4.45856	0.735124	P53_nolc_peak_116
1	161530231	161530509	279	161530363	8.63	8.36482	6.36111	3.09392	P53_nolc_peak_117
1	161530801	161531427	627	161530875	4.31	3.536	3.40417	0	P53_nolc_peak_118a
1	161530801	161531427	627	161531159	5.61	4.57131	4.23323	0.0864371	P53_nolc_peak_118b
1	161612509	161612820	312	161612733	7.77	2.9599	2.92168	0	P53_nolc_peak_119
1	162094358	162094655	298	162094601	6.47	4.07966	3.73543	0	P53_nolc_peak_120
1	163321681	163322138	458	163321789	6.04	4.07966	3.51973	0	P53_nolc_peak_121a
1	163321681	163322138	458	163322020	3.02	2.57739	2.5751	0	P53_nolc_peak_121b
1	165630800	165631014	215	165630982	4.75	3.47147	3.63695	0	P53_nolc_peak_122
1	167013273	167013656	384	167013365	4.31	3.71098	3.5109	0	P53_nolc_peak_123
1	167714618	167714917	300	167714764	9.49	7.06376	5.31869	2.01291	P53_nolc_peak_124
1	167715390	167715663	274	167715563	7.33	5.67201	4.61928	0.925403	P53_nolc_peak_125
1	170074568	170074831	264	170074679	4.31	3.536	3.40417	0	P53_nolc_peak_126
1	170531952	170532255	304	170532020	3.45	2.71475	2.94086	0	P53_nolc_peak_127
1	172207068	172207254	187	172207208	4.75	3.71098	3.79592	0	P53_nolc_peak_128
1	173714949	173715252	304	173715048	3.45	2.34139	2.69031	0	P53_nolc_peak_129
1	178270917	178271160	244	178271068	3.88	2.3854	2.98479	0	P53_nolc_peak_130
1	178278078	178278297	220	178278191	5.18	4.57131	3.95688	0.0864371	P53_nolc_peak_131
1	180516101	180516300	200	180516208	8.2	5.66407	4.4116	0.925403	P53_nolc_peak_132
1	181033158	181033363	206	181033270	6.9	4.20644	4.04476	0	P53_nolc_peak_133
1	181135039	181135282	244	181135159	11.22	7.73335	5.24816	2.5684	P53_nolc_peak_134
1	181424908	181425094	187	181425007	3.45	2.71475	2.94086	0	P53_nolc_peak_135
1	182144380	182144572	193	182144556	4.75	2.43654	2.87265	0	P53_nolc_peak_136
1	182601580	182601766	187	182601628	3.02	2.71475	2.65584	0	P53_nolc_peak_137
1	182643838	182644024	187	182643922	5.61	4.78414	4.36596	0.189606	P53_nolc_peak_138
1	182761339	182761686	348	182761542	12.08	6.6833	4.35964	1.71044	P53_nolc_peak_139
1	183471925	183472186	262	183472057	6.9	4.86783	4.52074	0.251826	P53_nolc_peak_140
1	185316200	185316386	187	185316359	3.88	2.71475	3.22588	0	P53_nolc_peak_141
1	185405110	185405296	187	185405162	3.88	2.68449	3.20459	0	P53_nolc_peak_142
1	186776150	186776349	200	186776193	5.18	4.07298	3.65074	0	P53_nolc_peak_143
1	186927900	186928188	289	186928036	7.77	4.98931	4.38251	0.344917	P53_nolc_peak_144
1	188117610	188117811	202	188117729	3.88	2.71475	3.22588	0	P53_nolc_peak_145
1	188389973	188390243	271	188390115	3.88	2.71475	3.22588	0	P53_nolc_peak_146
1	189786153	189786345	193	189786244	3.45	2.71475	2.94086	0	P53_nolc_peak_147
1	191710199	191710392	194	191710299	5.18	4.78414	4.08094	0.189606	P53_nolc_peak_148
1	192228892	192229172	281	192228956	3.02	2.71475	2.65584	0	P53_nolc_peak_149
1	192243047	192243277	231	192243144	4.31	3.47147	3.36387	0	P53_nolc_peak_150
1	192807127	192807313	187	192807209	4.31	3.71098	3.5109	0	P53_nolc_peak_151
1	195342489	195342792	304	195342662	3.88	2.71475	3.22588	0	P53_nolc_peak_152
1	198158926	198159112	187	198159017	3.45	2.62991	2.88603	0	P53_nolc_peak_153
1	198837406	198837724	319	198837471	3.45	2.57739	2.85146	0	P53_nolc_peak_154
1	198903348	198903706	359	198903440	5.61	4.78414	4.36596	0.189606	P53_nolc_peak_155
1	204506969	204507207	239	204507090	10.78	6.32216	4.7571	1.39059	P53_nolc_peak_156
1	204524940	204525198	259	204525062	9.92	4.95884	4.07081	0.335962	P53_nolc_peak_157
1	205122144	205122338	195	205122243	8.2	4.44355	3.60347	0	P53_nolc_peak_158
1	207240777	207241001	225	207240887	8.2	7.17196	5.37614	2.06668	P53_nolc_peak_159
1	208691168	208691354	187	208691268	3.88	2.71475	3.22588	0	P53_nolc_peak_160
1	210321583	210321832	250	210321707	8.2	5.91444	4.57579	1.05432	P53_nolc_peak_161
1	210510105	210510319	215	210510224	4.31	3.67246	3.48773	0	P53_nolc_peak_162
1	210653898	210654126	229	210654006	7.33	4.98931	4.16682	0.344917	P53_nolc_peak_163
1	212034902	212035202	301	212034946	3.02	2.57739	2.5751	0	P53_nolc_peak_164
1	212596285	212596697	413	212596510	10.78	7.79626	5.75653	2.62516	P53_nolc_peak_165
1	214439464	214439969	506	214439641	18.12	21.569	11.961	15.1985	P53_nolc_peak_166
1	215567861	215568066	206	215567968	3.02	2.57739	2.5751	0	P53_nolc_peak_167
1	217457124	217457377	254	217457227	3.45	2.71475	2.94086	0	P53_nolc_peak_168
1	218285195	218285442	248	218285306	5.18	3.22608	3.08834	0	P53_nolc_peak_169
1	221462329	221462515	187	221462449	3.45	2.71475	2.94086	0	P53_nolc_peak_170
1	222928208	222928534	327	222928379	6.47	5.92283	4.936	1.05432	P53_nolc_peak_171
1	223922644	223922830	187	223922729	3.45	2.34139	2.69031	0	P53_nolc_peak_172
1	226272496	226272901	406	226272623	10.78	6.26944	4.72146	1.3397	P53_nolc_peak_173
1	226479590	226479807	218	226479712	9.92	6.50084	5.14702	1.55104	P53_nolc_peak_174
1	227684902	227685106	205	227684984	3.88	2.57739	3.12781	0	P53_nolc_peak_175
1	227723592	227723791	200	227723712	7.33	4.84707	4.07075	0.245435	P53_nolc_peak_176
1	228459339	228459608	270	228459484	6.47	3.77533	3.52067	0	P53_nolc_peak_177
1	228647271	228647512	242	228647333	4.75	3.4092	3.5944	0	P53_nolc_peak_178
1	232593941	232594127	187	232594102	6.04	4.07966	3.51973	0	P53_nolc_peak_179
1	232953008	232953219	212	232953104	8.2	6.98599	5.26111	1.94806	P53_nolc_peak_180
1	233179688	233179902	215	233179774	10.35	3.53412	2.83834	0	P53_nolc_peak_181
1	234564649	234564943	295	234564837	4.75	2.55954	2.96914	0	P53_nolc_peak_182
1	234603021	234603207	187	234603070	4.31	2.55954	2.7462	0	P53_nolc_peak_183
1	234607269	234607499	231	234607386	5.61	3.16325	3.25762	0	P53_nolc_peak_184
1	234618417	234618749	333	234618555	9.92	2.95763	2.73049	0	P53_nolc_peak_185
1	234700185	234700469	285	234700317	11.22	5.86499	4.07205	1.05432	P53_nolc_peak_186
1	234724142	234724542	401	234724193	6.9	2.34354	2.63408	0	P53_nolc_peak_187
1	234726308	234726656	349	234726515	7.33	4.90254	4.10828	0.285447	P53_nolc_peak_188
1	235669964	235670278	315	235670105	8.63	6.04748	4.88127	1.14675	P53_nolc_peak_189
1	235675112	235675416	305	235675277	7.33	5.98263	4.81908	1.08645	P53_nolc_peak_190
1	236097178	236097386	209	236097293	12.94	6.6833	4.64724	1.71044	P53_nolc_peak_191
1	236209050	236209329	280	236209141	3.02	2.34139	2.42958	0	P53_nolc_peak_192
1	236557010	236557281	272	236557054	3.02	2.71475	2.65584	0	P53_nolc_peak_193
1	236794965	236795269	305	236795056	4.75	2.41881	2.85864	0	P53_nolc_peak_194
1	237655809	237655995	187	237655960	4.75	3.71098	3.79592	0	P53_nolc_peak_195
1	237698594	237698794	201	237698706	4.31	3.71098	3.5109	0	P53_nolc_peak_196
1	237765897	237766098	202	237765981	3.45	2.71475	2.94086	0	P53_nolc_peak_197
1	237932918	237933145	228	237933034	5.18	4.49276	3.91004	0.0325609	P53_nolc_peak_198
1	238123591	238123777	187	238123712	3.45	2.478	2.78474	0	P53_nolc_peak_199
1	238170807	238171042	236	238170851	3.02	2.57739	2.5751	0	P53_nolc_peak_200
1	238183084	238183270	187	238183183	3.45	2.71475	2.94086	0	P53_nolc_peak_201
1	238316103	238316327	225	238316223	3.45	2.5268	2.8177	0	P53_nolc_peak_202
1	238438875	238439061	187	238438928	3.45	2.71475	2.94086	0	P53_nolc_peak_203
1	238467897	238468177	281	238467971	3.02	2.57739	2.5751	0	P53_nolc_peak_204
1	238650335	238650609	275	238650401	3.02	2.71475	2.65584	0	P53_nolc_peak_205
1	238694783	238695157	375	238694944	3.88	2.71475	3.22588	0	P53_nolc_peak_206
1	238713098	238713456	359	238713165	3.02	2.71475	2.65584	0	P53_nolc_peak_207
1	238749133	238749319	187	238749267	3.02	2.71475	2.65584	0	P53_nolc_peak_208
1	238769454	238769640	187	238769576	3.45	2.71475	2.94086	0	P53_nolc_peak_209
1	238772602	238772859	258	238772652	3.45	2.71475	2.94086	0	P53_nolc_peak_210
1	238789204	238789390	187	238789257	3.88	2.62991	3.16574	0	P53_nolc_peak_211
1	238791553	238791830	278	238791721	4.75	3.71098	3.79592	0	P53_nolc_peak_212
1	238840853	238841099	247	238840945	3.02	2.57739	2.5751	0	P53_nolc_peak_213
1	238868807	238869006	200	238868853	3.02	2.62991	2.60632	0	P53_nolc_peak_214
1	238934508	238934726	219	238934667	3.88	2.71475	3.22588	0	P53_nolc_peak_215
1	238955108	238955325	218	238955216	4.75	3.71098	3.79592	0	P53_nolc_peak_216
1	239062933	239063262	330	239062978	3.02	2.71475	2.65584	0	P53_nolc_peak_217
1	239064167	239064361	195	239064244	4.31	3.71098	3.5109	0	P53_nolc_peak_218
1	239585983	239586169	187	239586072	3.45	2.71475	2.94086	0	P53_nolc_peak_219
1	239706592	239706960	369	239706794	7.33	2.9599	2.77788	0	P53_nolc_peak_220
1	239738405	239738709	305	239738448	3.02	2.71475	2.65584	0	P53_nolc_peak_221
1	241192554	241192861	308	241192634	3.45	2.62991	2.88603	0	P53_nolc_peak_222
1	242442079	242442265	187	242442148	4.31	3.23459	3.21179	0	P53_nolc_peak_223
1	243766022	243766208	187	243766112	3.02	2.71475	2.65584	0	P53_nolc_peak_224
1	244450653	244450839	187	244450697	3.45	2.478	2.78474	0	P53_nolc_peak_225
1	244645361	244645547	187	244645512	3.88	2.3854	2.98479	0	P53_nolc_peak_226
1	244735459	244735774	316	244735610	16.82	11.1056	6.4632	5.52777	P53_nolc_peak_227
1	244834784	244835062	279	244834876	8.2	4.14139	3.40394	0	P53_nolc_peak_228
1	245142348	245142609	262	245142454	6.47	4.07966	3.73543	0	P53_nolc_peak_229
1	248873697	248874327	631	248873801	5.18	3.22608	3.08834	0	P53_nolc_peak_230
1	248946051	248946244	194	248946132	7.33	2.9599	2.77788	0	P53_nolc_peak_231
10	373629	373861	233	373716	5.18	4.57131	3.95688	0.0864371	P53_nolc_peak_232
10	378449	378982	534	378850	13.8	11.3449	7.40225	5.74567	P53_nolc_peak_233
10	520506	520703	198	520625	6.47	5.67202	4.78594	0.925403	P53_nolc_peak_234
10	521776	522029	254	521981	3.88	2.71475	3.22588	0	P53_nolc_peak_235
10	1054798	1055087	290	1054937	9.49	8.89926	6.48729	3.57856	P53_nolc_peak_236
10	7473649	7473836	188	7473750	4.75	3.536	3.68052	0	P53_nolc_peak_237
10	8764304	8764496	193	8764394	4.31	3.71098	3.5109	0	P53_nolc_peak_238
10	9553169	9553392	224	9553305	8.63	8.0378	6.16772	2.83027	P53_nolc_peak_239
10	11071696	11072039	344	11071899	9.06	9.65634	6.64613	4.20284	P53_nolc_peak_240
10	11758060	11758305	246	11758166	6.04	5.86766	4.62029	1.05432	P53_nolc_peak_241
10	13529723	13529933	211	13529838	3.45	2.71475	2.94086	0	P53_nolc_peak_242
10	17643938	17644136	199	17644052	3.88	2.71475	3.22588	0	P53_nolc_peak_243
10	21726929	21727363	435	21726978	4.31	3.71098	3.5109	0	P53_nolc_peak_244
10	24256119	24256311	193	24256210	5.61	3.77702	3.70117	0	P53_nolc_peak_245
10	28327548	28327812	265	28327692	9.06	7.64036	5.4625	2.48905	P53_nolc_peak_246
10	29444229	29444438	210	29444339	6.9	5.92283	5.22102	1.05432	P53_nolc_peak_247
10	30002495	30002733	239	30002538	3.02	2.62991	2.60632	0	P53_nolc_peak_248
10	38984380	38984800	421	38984472	3.45	2.71475	2.94086	0	P53_nolc_peak_249
10	42114010	42114196	187	42114156	3.45	2.71475	2.94086	0	P53_nolc_peak_250
10	42152685	42152871	187	42152772	4.75	3.536	3.68052	0	P53_nolc_peak_251
10	42156509	42156695	187	42156588	4.31	3.71098	3.5109	0	P53_nolc_peak_252
10	42158232	42158418	187	42158395	4.31	3.71098	3.5109	0	P53_nolc_peak_253
10	42159983	42160220	238	42160091	4.75	3.71098	3.79592	0	P53_nolc_peak_254
10	42161140	42161326	187	42161205	3.45	2.71475	2.94086	0	P53_nolc_peak_255
10	44301301	44301573	273	44301480	3.88	2.71475	3.22588	0	P53_nolc_peak_256
10	45438410	45438750	341	45438607	8.2	6.8098	5.1509	1.82509	P53_nolc_peak_257
10	45514352	45514589	238	45514523	3.02	2.62991	2.60632	0	P53_nolc_peak_258
10	46718839	46719025	187	46718931	3.02	2.71475	2.65584	0	P53_nolc_peak_259
10	46727436	46727641	206	46727600	3.88	2.71475	3.22588	0	P53_nolc_peak_260
10	47396259	47396475	217	47396330	3.02	2.478	2.51485	0	P53_nolc_peak_261
10	47481972	47482201	230	47482101	3.88	2.5268	3.09079	0	P53_nolc_peak_262
10	50622029	50622295	267	50622155	7.33	4.98931	4.16682	0.344917	P53_nolc_peak_263
10	52314342	52314528	187	52314426	4.75	3.71098	3.79592	0	P53_nolc_peak_264
10	52443490	52443907	418	52443661	7.33	4.98931	4.16682	0.344917	P53_nolc_peak_265
10	52703788	52704162	375	52703938	5.61	4.78414	4.36596	0.189606	P53_nolc_peak_266
10	53619771	53620023	253	53619909	6.04	5.92283	4.65098	1.05432	P53_nolc_peak_267
10	58385596	58385813	218	58385801	3.02	2.71475	2.65584	0	P53_nolc_peak_268
10	58781888	58782074	187	58781990	4.31	3.71098	3.5109	0	P53_nolc_peak_269
10	59362454	59362701	248	59362606	5.61	4.78414	4.36596	0.189606	P53_nolc_peak_270
10	60760767	60760980	214	60760915	6.47	4.25964	3.86091	0	P53_nolc_peak_271
10	60964495	60964681	187	60964577	3.02	2.71475	2.65584	0	P53_nolc_peak_272
10	63628775	63629054	280	63628893	5.18	4.57131	3.95688	0.0864371	P53_nolc_peak_273
10	67764307	67764523	217	67764486	4.75	3.536	3.68052	0	P53_nolc_peak_274
10	68332837	68333043	207	68332966	3.02	2.71475	2.65584	0	P53_nolc_peak_275
10	69801389	69801580	192	69801508	5.61	4.2727	4.03966	0	P53_nolc_peak_276
10	70146820	70147124	305	70146965	8.2	7.47161	5.55843	2.33993	P53_nolc_peak_277
10	77925232	77925418	187	77925275	3.02	2.71475	2.65584	0	P53_nolc_peak_278
10	80471126	80471331	206	80471234	5.18	4.73731	4.05401	0.189606	P53_nolc_peak_279
10	83983498	83983930	433	83983785	6.47	5.92283	4.936	1.05432	P53_nolc_peak_280
10	87658426	87658759	334	87658510	3.88	2.43091	3.0193	0	P53_nolc_peak_281
10	87658949	87659321	373	87659037	4.31	3.67246	3.48773	0	P53_nolc_peak_282
10	95339217	95339470	254	95339403	3.45	2.478	2.78474	0	P53_nolc_peak_283
10	96089795	96090369	575	96090286	4.31	3.71098	3.5109	0	P53_nolc_peak_284
10	96129900	96130280	381	96129935	4.31	2.43654	2.65695	0	P53_nolc_peak_285
10	97651856	97652066	211	97651941	6.04	5.40341	4.35314	0.70699	P53_nolc_peak_286
10	100286118	100286305	188	100286171	5.61	3.22608	3.30404	0	P53_nolc_peak_287
10	106515452	106515735	284	106515621	4.31	3.71098	3.5109	0	P53_nolc_peak_288
10	106980831	106981182	352	106980924	4.31	3.47147	3.36387	0	P53_nolc_peak_289
10	112724604	112724818	215	112724713	5.18	4.78414	4.08094	0.189606	P53_nolc_peak_290
10	113048327	113048542	216	113048499	3.88	2.71475	3.22588	0	P53_nolc_peak_291
10	113369379	113369597	219	113369488	6.47	4.07966	3.73543	0	P53_nolc_peak_292
10	117541385	117541571	187	117541544	5.18	4.13751	3.69154	0	P53_nolc_peak_293
10	119892632	119892891	260	119892699	3.02	2.71475	2.65584	0	P53_nolc_peak_294
10	121597021	121597417	397	121597261	3.88	2.71475	3.22588	0	P53_nolc_peak_295
10	123445451	123445716	266	123445586	7.77	7.05505	5.75284	2.00839	P53_nolc_peak_296
10	124105664	124105853	190	124105811	4.31	3.71098	3.5109	0	P53_nolc_peak_297
10	125633624	125633966	343	125633724	6.04	4.07966	3.51973	0	P53_nolc_peak_298
10	127863220	127863486	267	127863378	7.33	7.11857	5.50604	2.01982	P53_nolc_peak_299
10	127939774	127940117	344	127939941	5.61	4.78414	4.36596	0.189606	P53_nolc_peak_300
10	132763464	132763915	452	132763676	9.06	9.57607	6.60226	4.17616	P53_nolc_peak_301
10	133660510	133660779	270	133660627	5.18	4.78414	4.08094	0.189606	P53_nolc_peak_302
10	133776192	133776412	221	133776299	6.47	5.92283	4.936	1.05432	P53_nolc_peak_303
11	435468	435798	331	435644	19.41	18.7993	10.2063	12.6569	P53_nolc_peak_304
11	1830730	1830988	259	1830865	12.94	10.1454	6.93687	4.66197	P53_nolc_peak_305
11	3406458	3406651	194	3406557	6.47	4.07966	3.73543	0	P53_nolc_peak_306
11	4607934	4608120	187	4608051	4.31	3.71098	3.5109	0	P53_nolc_peak_307
11	8682483	8682868	386	8682755	4.31	3.23459	3.21179	0	P53_nolc_peak_308
11	10044648	10044841	194	10044738	3.45	2.68449	2.92145	0	P53_nolc_peak_309
11	10303722	10304045	324	10303836	3.02	2.71475	2.65584	0	P53_nolc_peak_310
11	10304942	10305139	198	10305062	6.47	2.34354	2.49029	0	P53_nolc_peak_311
11	10659876	10660062	187	10659968	3.88	2.57739	3.12781	0	P53_nolc_peak_312
11	10899537	10899724	188	10899629	6.9	4.07966	3.95112	0	P53_nolc_peak_313
11	17378728	17378997	270	17378872	6.04	5.92283	4.65098	1.05432	P53_nolc_peak_314
11	27088423	27088672	250	27088523	3.45	2.71475	2.94086	0	P53_nolc_peak_315
11	27234316	27234557	242	27234380	3.88	2.68449	3.20459	0	P53_nolc_peak_316
11	27363210	27363489	280	27363339	3.02	2.71475	2.65584	0	P53_nolc_peak_317
11	27395775	27396056	282	27395825	3.02	2.43091	2.48577	0	P53_nolc_peak_318
11	30322911	30323163	253	30323050	4.75	2.43654	2.87265	0	P53_nolc_peak_319
11	33045794	33046118	325	33045985	6.9	2.34354	2.63408	0	P53_nolc_peak_320
11	33895905	33896161	257	33895993	4.75	2.97787	3.28678	0	P53_nolc_peak_321
11	34359102	34359366	265	34359197	4.75	3.34904	3.55284	0	P53_nolc_peak_322
11	36018269	36018528	260	36018407	6.9	5.92283	5.22102	1.05432	P53_nolc_peak_323
11	38595063	38595253	191	38595154	6.04	5.92283	4.65098	1.05432	P53_nolc_peak_324
11	57788475	57788784	310	57788560	4.31	2.43654	2.65695	0	P53_nolc_peak_325
11	58577803	58578532	730	58578090	5.18	4.78414	4.08094	0.189606	P53_nolc_peak_326a
11	58577803	58578532	730	58578395	3.88	2.71475	3.22588	0	P53_nolc_peak_326b
11	59550595	59550983	389	59550883	6.04	4.48508	3.78425	0.0296994	P53_nolc_peak_327
11	59556340	59556596	257	59556468	6.04	5.92283	4.65098	1.05432	P53_nolc_peak_328
11	59560242	59560591	350	59560331	5.18	4.34361	3.81961	0	P53_nolc_peak_329
11	62543074	62543260	187	62543138	6.04	2.34354	2.34649	0	P53_nolc_peak_330
11	62591497	62591935	439	62591646	5.61	4.57131	4.23323	0.0864371	P53_nolc_peak_331
11	62599942	62600197	256	62600079	7.77	6.72294	5.54854	1.74413	P53_nolc_peak_332
11	62805317	62805660	344	62805424	6.9	4.07966	3.95112	0	P53_nolc_peak_333
11	62841485	62841716	232	62841601	8.2	5.01572	3.98286	0.364838	P53_nolc_peak_334
11	62855973	62856196	224	62856064	4.31	2.71416	2.85663	0	P53_nolc_peak_335
11	65117626	65117816	191	65117806	4.75	2.43654	2.87265	0	P53_nolc_peak_336
11	65382318	65382515	198	65382423	6.9	4.07966	3.95112	0	P53_nolc_peak_337
11	65421185	65421468	284	65421315	8.63	5.94877	4.8139	1.05594	P53_nolc_peak_338
11	65427264	65427766	503	65427395	3.88	2.71475	3.22588	0	P53_nolc_peak_339
11	65430044	65430268	225	65430166	4.75	3.71098	3.79592	0	P53_nolc_peak_340
11	65498908	65499173	266	65499044	9.49	7.64036	5.69676	2.48905	P53_nolc_peak_341
11	66421675	66422065	391	66421775	5.18	4.57131	3.95688	0.0864371	P53_nolc_peak_342
11	67789999	67790187	189	67790100	7.77	5.82319	4.96124	1.05432	P53_nolc_peak_343
11	69121054	69121257	204	69121155	8.2	6.98599	5.26111	1.94806	P53_nolc_peak_344
11	71802796	71803048	253	71802926	7.77	6.6198	5.48363	1.65792	P53_nolc_peak_345
11	76235436	76235622	187	76235569	6.47	4.86783	4.27395	0.251826	P53_nolc_peak_346
11	83156440	83156626	187	83156529	3.02	2.57739	2.5751	0	P53_nolc_peak_347
11	83285622	83285869	248	83285753	6.47	5.67202	4.78594	0.925403	P53_nolc_peak_348
11	86519318	86519605	288	86519511	3.02	2.71475	2.65584	0	P53_nolc_peak_349
11	92843529	92843889	361	92843659	6.47	5.92283	4.936	1.05432	P53_nolc_peak_350
11	95065416	95065869	454	95065559	5.61	4.78414	4.36596	0.189606	P53_nolc_peak_351
11	96243359	96243545	187	96243413	6.04	3.77533	3.31737	0	P53_nolc_peak_352
11	96693466	96693790	325	96693515	3.02	2.71475	2.65584	0	P53_nolc_peak_353
11	102223857	102224110	254	102223991	8.2	8.0378	5.89136	2.83027	P53_nolc_peak_354
11	102256295	102256558	264	102256428	15.96	13.6649	8.43937	7.90071	P53_nolc_peak_355
11	112961091	112961424	334	112961251	5.18	4.65276	4.00485	0.153249	P53_nolc_peak_356
11	113447030	113447216	187	113447152	4.31	3.71098	3.5109	0	P53_nolc_peak_357
11	119095285	119095620	336	119095348	5.61	3.89043	3.78036	0	P53_nolc_peak_358
11	119696246	119696802	557	119696453	3.88	2.57739	3.12781	0	P53_nolc_peak_359
11	121236522	121236761	240	121236627	7.33	4.98931	4.16682	0.344917	P53_nolc_peak_360
11	124673595	124673950	356	124673795	6.04	4.07966	3.51973	0	P53_nolc_peak_361
11	129636924	129637143	220	129637043	3.88	2.71475	3.22588	0	P53_nolc_peak_362
11	134851753	134852042	290	134851890	4.31	3.71098	3.5109	0	P53_nolc_peak_363
12	2004379	2004638	260	2004629	6.47	4.07966	3.73543	0	P53_nolc_peak_364
12	2255815	2256072	258	2255957	7.33	7.11857	5.50604	2.01982	P53_nolc_peak_365
12	3217468	3217654	187	3217555	4.31	3.71098	3.5109	0	P53_nolc_peak_366
12	3299995	3300258	264	3300117	9.06	9.65634	6.64613	4.20284	P53_nolc_peak_367
12	10073369	10073561	193	10073458	6.04	4.86783	4.02715	0.251826	P53_nolc_peak_368
12	10361238	10361434	197	10361313	4.75	3.71098	3.79592	0	P53_nolc_peak_369
12	12445972	12446178	207	12446073	5.61	4.57131	4.23323	0.0864371	P53_nolc_peak_370
12	12718052	12718359	308	12718121	3.02	2.71475	2.65584	0	P53_nolc_peak_371
12	12722567	12722847	281	12722614	3.02	2.57739	2.5751	0	P53_nolc_peak_372
12	13099881	13100067	187	13099972	7.33	5.90182	4.76753	1.05432	P53_nolc_peak_373
12	14257813	14258231	419	14257988	4.31	3.60294	3.44544	0	P53_nolc_peak_374
12	14770905	14771091	187	14771057	4.31	3.71098	3.5109	0	P53_nolc_peak_375
12	15175538	15175724	187	15175633	4.31	3.536	3.40417	0	P53_nolc_peak_376
12	15535333	15535519	187	15535478	4.75	3.71098	3.79592	0	P53_nolc_peak_377
12	15936721	15937130	410	15936899	22.43	22.8283	11.7162	16.3437	P53_nolc_peak_378
12	19431893	19432144	252	19432028	9.49	6.24981	4.7754	1.32389	P53_nolc_peak_379
12	23315929	23316115	187	23316087	3.88	2.71475	3.22588	0	P53_nolc_peak_380
12	25195096	25195336	241	25195235	3.45	2.478	2.78474	0	P53_nolc_peak_381
12	26226576	26226867	292	26226762	5.18	3.22608	3.08834	0	P53_nolc_peak_382
12	34022282	34022653	372	34022357	3.02	2.71475	2.65584	0	P53_nolc_peak_383
12	36473394	36473580	187	36473479	4.75	3.71098	3.79592	0	P53_nolc_peak_384
12	36487701	36487889	189	36487803	5.18	4.78414	4.08094	0.189606	P53_nolc_peak_385
12	36777968	36778162	195	36778063	9.49	4.33257	3.49686	0	P53_nolc_peak_386
12	38316578	38316764	187	38316670	4.75	3.71098	3.79592	0	P53_nolc_peak_387
12	38890266	38890582	317	38890458	6.04	4.07966	3.51973	0	P53_nolc_peak_388
12	43885173	43885359	187	43885269	6.04	5.16001	4.20719	0.492089	P53_nolc_peak_389
12	44029288	44029552	265	44029449	5.18	4.73731	4.05401	0.189606	P53_nolc_peak_390
12	46357256	46357532	277	46357282	3.45	2.57739	2.85146	0	P53_nolc_peak_391
12	46371439	46371766	328	46371503	3.02	2.71475	2.65584	0	P53_nolc_peak_392
12	47088313	47088524	212	47088371	3.02	2.68449	2.63831	0	P53_nolc_peak_393
12	52176057	52176309	253	52176207	6.47	5.00971	4.36739	0.36153	P53_nolc_peak_394
12	53675971	53676237	267	53676014	4.75	2.43654	2.87265	0	P53_nolc_peak_395
12	54037521	54037763	243	54037691	5.18	3.22608	3.08834	0	P53_nolc_peak_396
12	54279913	54280201	289	54280106	3.02	2.71475	2.65584	0	P53_nolc_peak_397
12	54280627	54280900	274	54280747	4.75	3.71098	3.79592	0	P53_nolc_peak_398
12	54359246	54359470	225	54359344	5.61	4.57131	4.23323	0.0864371	P53_nolc_peak_399
12	54359673	54359859	187	54359764	3.88	2.71475	3.22588	0	P53_nolc_peak_400
12	56117934	56118431	498	56118142	6.04	5.48991	4.40407	0.783908	P53_nolc_peak_401
12	57522234	57522499	266	57522375	13.8	10.6942	6.97667	5.15436	P53_nolc_peak_402
12	58007361	58007556	196	58007519	4.31	3.71098	3.5109	0	P53_nolc_peak_403
12	62602620	62602937	318	62602666	3.45	2.57739	2.85146	0	P53_nolc_peak_404
12	66014966	66015306	341	66015191	5.18	4.78414	4.08094	0.189606	P53_nolc_peak_405
12	66916268	66916465	198	66916374	4.75	3.71098	3.79592	0	P53_nolc_peak_406
12	68042236	68042468	233	68042348	7.77	5.59929	4.80855	0.880177	P53_nolc_peak_407
12	68808741	68809141	401	68808936	20.28	23.8454	12.8591	17.3233	P53_nolc_peak_408
12	70091172	70091418	247	70091318	3.45	2.71475	2.94086	0	P53_nolc_peak_409
12	71663957	71664151	195	71664023	3.02	2.57739	2.5751	0	P53_nolc_peak_410
12	74530691	74531038	348	74530843	4.75	3.71098	3.79592	0	P53_nolc_peak_411
12	75878251	75878562	312	75878462	3.02	2.478	2.51485	0	P53_nolc_peak_412
12	77065981	77066183	203	77066081	7.77	6.82969	5.61501	1.83626	P53_nolc_peak_413
12	77189517	77189703	187	77189655	3.02	2.71475	2.65584	0	P53_nolc_peak_414
12	78315204	78315390	187	78315298	3.02	2.71475	2.65584	0	P53_nolc_peak_415
12	80778055	80778275	221	80778174	4.31	3.60294	3.44544	0	P53_nolc_peak_416
12	88141950	88142275	326	88142257	3.88	2.71475	3.22588	0	P53_nolc_peak_417
12	88559707	88560087	381	88559889	14.24	16.6667	10.0664	10.6846	P53_nolc_peak_418
12	91119277	91119505	229	91119380	6.9	5.92283	5.22102	1.05432	P53_nolc_peak_419
12	92784522	92784792	271	92784660	9.06	6.95302	5.0296	1.92273	P53_nolc_peak_420
12	98503327	98503583	257	98503471	6.04	4.31405	3.67347	0	P53_nolc_peak_421
12	98644402	98644603	202	98644548	9.06	4.57398	3.50495	0.0886528	P53_nolc_peak_422
12	100753717	100753971	255	100753854	6.04	5.92283	4.65098	1.05432	P53_nolc_peak_423
12	101855360	101855616	257	101855488	5.61	3.66951	3.62523	0	P53_nolc_peak_424
12	103523801	103524067	267	103523928	9.49	9.02555	6.56318	3.69557	P53_nolc_peak_425
12	104546738	104546971	234	104546829	6.04	5.16001	4.20719	0.492089	P53_nolc_peak_426
12	108562719	108562905	187	108562833	3.88	2.68449	3.20459	0	P53_nolc_peak_427
12	114683931	114684162	232	114684105	6.04	3.37645	3.04871	0	P53_nolc_peak_428
12	114937042	114937311	270	114937165	4.75	3.71098	3.79592	0	P53_nolc_peak_429
12	122946849	122947087	239	122946972	9.49	7.06376	5.31869	2.01291	P53_nolc_peak_430
12	124914465	124914891	427	124914559	5.61	3.22608	3.30404	0	P53_nolc_peak_431
12	124927332	124927658	327	124927476	5.18	2.89877	2.86037	0	P53_nolc_peak_432
12	124938604	124938895	292	124938751	12.51	9.02505	5.99686	3.69557	P53_nolc_peak_433
12	125687970	125688179	210	125688070	4.31	3.71098	3.5109	0	P53_nolc_peak_434
12	132265894	132266299	406	132266060	10.35	7.6434	5.44631	2.49111	P53_nolc_peak_435
13	18177181	18177480	300	18177319	3.45	2.71475	2.94086	0	P53_nolc_peak_436
13	18211749	18212220	472	18211914	47.88	10.9988	3.05527	5.4238	P53_nolc_peak_437a
13	18211749	18212220	472	18212070	55.22	21.2184	4.68483	14.88	P53_nolc_peak_437b
13	23325373	23325569	197	23325466	5.18	4.78414	4.08094	0.189606	P53_nolc_peak_438
13	30617510	30617746	237	30617597	6.9	4.86783	4.52074	0.251826	P53_nolc_peak_439
13	33940975	33941214	240	33941091	3.88	2.71475	3.22588	0	P53_nolc_peak_440
13	40233673	40233966	294	40233804	6.9	5.92283	5.22102	1.05432	P53_nolc_peak_441
13	40771157	40771360	204	40771249	4.31	3.536	3.40417	0	P53_nolc_peak_442
13	41061491	41061700	210	41061586	3.88	2.71475	3.22588	0	P53_nolc_peak_443
13	41132782	41132968	187	41132870	3.45	2.71475	2.94086	0	P53_nolc_peak_444
13	45773204	45773530	327	45773337	3.88	2.71475	3.22588	0	P53_nolc_peak_445
13	48066635	48066850	216	48066749	6.9	4.07966	3.95112	0	P53_nolc_peak_446
13	50529400	50529677	278	50529520	8.2	8.36482	6.07609	3.09392	P53_nolc_peak_447
13	61750692	61751090	399	61750782	6.04	2.97884	2.77866	0	P53_nolc_peak_448
13	61764123	61764658	536	61764269	6.47	3.95712	3.6493	0	P53_nolc_peak_449
13	61767447	61768315	869	61767620	5.61	3.37746	3.41503	0	P53_nolc_peak_450a
13	61767447	61768315	869	61767983	7.33	5.39157	4.43538	0.700063	P53_nolc_peak_450b
13	61770146	61770930	785	61770263	5.18	4.01036	3.61083	0	P53_nolc_peak_451a
13	61770146	61770930	785	61770808	5.18	3.22608	3.08834	0	P53_nolc_peak_451b
13	61771230	61772293	1064	61771330	5.18	3.89043	3.53357	0	P53_nolc_peak_452a
13	61771230	61772293	1064	61771693	7.33	6.82969	5.33865	1.83626	P53_nolc_peak_452b
13	61771230	61772293	1064	61772171	5.18	4.57131	3.95688	0.0864371	P53_nolc_peak_452c
13	61772730	61773189	460	61772825	5.18	3.22608	3.08834	0	P53_nolc_peak_453
13	61773474	61773915	442	61773787	4.31	2.97787	3.03999	0	P53_nolc_peak_454
13	61774695	61775131	437	61775004	6.9	3.77533	3.72396	0	P53_nolc_peak_455
13	61776738	61777270	533	61776860	7.77	4.44011	3.98991	0	P53_nolc_peak_456a
13	61776738	61777270	533	61777154	7.77	4.39335	3.95623	0	P53_nolc_peak_456b
13	61777491	61777819	329	61777643	6.47	2.34354	2.49029	0	P53_nolc_peak_457
13	61791507	61791915	409	61791620	6.9	2.91945	3.07385	0	P53_nolc_peak_458
13	61793833	61794182	350	61793997	6.47	3.16818	3.0856	0	P53_nolc_peak_459
13	61796556	61796763	208	61796653	6.9	3.48871	3.50759	0	P53_nolc_peak_460
13	61797203	61797412	210	61797282	7.33	4.08774	3.55167	0	P53_nolc_peak_461
13	61815353	61815539	187	61815445	6.9	3.34029	3.39487	0	P53_nolc_peak_462
13	61818067	61818383	317	61818161	6.47	3.10311	3.03866	0	P53_nolc_peak_463
13	61835518	61836247	730	61835616	5.61	2.40903	2.68774	0	P53_nolc_peak_464a
13	61835518	61836247	730	61836055	6.9	3.13539	3.23876	0	P53_nolc_peak_464b
13	61838790	61839123	334	61838977	6.47	3.04003	2.99313	0	P53_nolc_peak_465
13	61842626	61842842	217	61842725	6.47	3.34029	3.20954	0	P53_nolc_peak_466
13	61846175	61846409	235	61846220	6.04	2.34354	2.34649	0	P53_nolc_peak_467
13	61850204	61850409	206	61850297	6.9	4.25964	4.08385	0	P53_nolc_peak_468
13	61850767	61851292	526	61850914	5.18	2.9706	2.91078	0	P53_nolc_peak_469a
13	61850767	61851292	526	61851143	8.2	5.01572	3.98286	0.364838	P53_nolc_peak_469b
13	61851478	61851721	244	61851545	7.77	5.01698	4.4021	0.365055	P53_nolc_peak_470
13	61852187	61852666	480	61852334	6.9	4.20644	4.04476	0	P53_nolc_peak_471
13	61862729	61862944	216	61862822	6.04	3.13539	2.88515	0	P53_nolc_peak_472
13	61863407	61863593	187	61863550	6.47	2.52366	2.62016	0	P53_nolc_peak_473
13	61884579	61884920	342	61884820	6.47	3.77533	3.52067	0	P53_nolc_peak_474
13	61885157	61885423	267	61885330	7.77	4.68714	4.16727	0.183921	P53_nolc_peak_475
13	61887181	61887421	241	61887201	4.75	2.75526	3.1199	0	P53_nolc_peak_476
13	61888236	61888565	330	61888390	6.9	4.07966	3.95112	0	P53_nolc_peak_477
13	61895150	61895504	355	61895249	6.9	3.45064	3.47871	0	P53_nolc_peak_478
13	61895946	61896397	452	61896074	6.04	3.26976	2.97639	0	P53_nolc_peak_479
13	61908850	61909212	363	61909131	6.47	3.37645	3.23554	0	P53_nolc_peak_480
13	61909400	61909651	252	61909424	6.04	3.37645	3.04871	0	P53_nolc_peak_481
13	61910004	61910197	194	61910143	7.33	4.98931	4.16682	0.344917	P53_nolc_peak_482
13	61910402	61910839	438	61910661	6.04	4.07966	3.51973	0	P53_nolc_peak_483
13	61911606	61911920	315	61911693	6.04	3.77533	3.31737	0	P53_nolc_peak_484
13	61912176	61912668	493	61912284	5.18	4.20404	3.73326	0	P53_nolc_peak_485
13	61913598	61913915	318	61913810	5.18	3.00758	2.93666	0	P53_nolc_peak_486
13	61934847	61935033	187	61934929	7.77	3.43996	3.26688	0	P53_nolc_peak_487
13	61988652	61989021	370	61988856	6.04	2.5	2.45278	0	P53_nolc_peak_488
13	61989164	61989359	196	61989276	5.61	2.66758	2.88524	0	P53_nolc_peak_489
13	61990254	61990572	319	61990315	4.75	2.32117	2.78101	0	P53_nolc_peak_490
13	61991985	61992520	536	61992366	4.31	2.35302	2.59569	0	P53_nolc_peak_491
13	61993426	61993626	201	61993586	4.75	2.48758	2.91284	0	P53_nolc_peak_492
13	62033753	62034075	323	62033829	6.47	2.34354	2.49029	0	P53_nolc_peak_493
13	62088034	62088596	563	62088371	5.61	3.28893	3.35027	0	P53_nolc_peak_494
13	62469203	62469389	187	62469282	5.18	3.16325	3.04495	0	P53_nolc_peak_495
13	62537400	62538135	736	62537678	4.31	3.47147	3.36387	0	P53_nolc_peak_496
13	62550972	62551158	187	62551016	3.02	2.71475	2.65584	0	P53_nolc_peak_497
13	62555050	62555244	195	62555138	3.45	2.478	2.78474	0	P53_nolc_peak_498
13	62653695	62653881	187	62653779	4.75	3.23459	3.47253	0	P53_nolc_peak_499
13	62659086	62659272	187	62659233	4.75	3.4092	3.5944	0	P53_nolc_peak_500
13	62684369	62684658	290	62684561	3.45	2.43091	2.75253	0	P53_nolc_peak_501
13	62697973	62698159	187	62698053	3.45	2.57739	2.85146	0	P53_nolc_peak_502
13	62702886	62703445	560	62703043	4.31	2.43654	2.65695	0	P53_nolc_peak_503
13	62747644	62747973	330	62747891	4.75	2.43654	2.87265	0	P53_nolc_peak_504
13	62770254	62770607	354	62770345	3.88	2.478	3.05463	0	P53_nolc_peak_505
13	62825103	62825439	337	62825235	3.88	2.71475	3.22588	0	P53_nolc_peak_506
13	62905006	62905318	313	62905202	3.88	2.34139	2.95105	0	P53_nolc_peak_507
13	62936916	62937299	384	62937220	4.31	3.23459	3.21179	0	P53_nolc_peak_508
13	62954763	62955030	268	62954825	3.02	2.57739	2.5751	0	P53_nolc_peak_509
13	63033608	63033847	240	63033746	3.88	2.71475	3.22588	0	P53_nolc_peak_510
13	63071744	63071960	217	63071848	4.75	3.4092	3.5944	0	P53_nolc_peak_511
13	63079263	63079496	234	63079386	4.31	3.29088	3.2485	0	P53_nolc_peak_512
13	63518697	63519078	382	63518767	3.02	2.71475	2.65584	0	P53_nolc_peak_513
13	63632616	63633058	443	63632908	4.75	3.71098	3.79592	0	P53_nolc_peak_514
13	63851236	63851520	285	63851317	3.45	2.3854	2.72107	0	P53_nolc_peak_515
13	63855629	63855992	364	63855719	4.31	3.71098	3.5109	0	P53_nolc_peak_516
13	63913452	63913681	230	63913505	3.02	2.34139	2.42958	0	P53_nolc_peak_517
13	63944162	63944386	225	63944225	3.45	2.3854	2.72107	0	P53_nolc_peak_518
13	63945292	63945681	390	63945395	3.88	2.3854	2.98479	0	P53_nolc_peak_519
13	63956275	63956580	306	63956491	3.45	2.34139	2.69031	0	P53_nolc_peak_520
13	63964757	63964992	236	63964856	3.45	2.71475	2.94086	0	P53_nolc_peak_521
13	63965849	63966102	254	63965964	3.88	2.68449	3.20459	0	P53_nolc_peak_522
13	63976982	63977168	187	63977073	4.75	3.23459	3.47253	0	P53_nolc_peak_523
13	63992451	63992727	277	63992616	4.75	2.43654	2.87265	0	P53_nolc_peak_524
13	63996177	63996397	221	63996276	4.31	3.71098	3.5109	0	P53_nolc_peak_525
13	64011753	64011973	221	64011836	3.02	2.57739	2.5751	0	P53_nolc_peak_526
13	64017092	64017298	207	64017209	4.31	3.71098	3.5109	0	P53_nolc_peak_527
13	64028569	64028921	353	64028663	3.88	2.68449	3.20459	0	P53_nolc_peak_528
13	64030279	64030465	187	64030418	5.18	4.78414	4.08094	0.189606	P53_nolc_peak_529
13	64031250	64031439	190	64031331	3.02	2.71475	2.65584	0	P53_nolc_peak_530
13	64038923	64039109	187	64038997	3.45	2.5268	2.8177	0	P53_nolc_peak_531
13	64049461	64049806	346	64049527	3.02	2.34139	2.42958	0	P53_nolc_peak_532
13	64067366	64067561	196	64067471	3.88	2.43091	3.0193	0	P53_nolc_peak_533
13	64125475	64125661	187	64125562	3.88	2.71475	3.22588	0	P53_nolc_peak_534
13	64125950	64126144	195	64126113	3.88	2.71475	3.22588	0	P53_nolc_peak_535
13	64127184	64127397	214	64127324	5.18	4.57131	3.95688	0.0864371	P53_nolc_peak_536
13	64128082	64128358	277	64128152	3.02	2.68449	2.63831	0	P53_nolc_peak_537
13	64155229	64155504	276	64155282	3.88	2.34139	2.95105	0	P53_nolc_peak_538
13	64157363	64157653	291	64157449	3.45	2.57739	2.85146	0	P53_nolc_peak_539
13	64160453	64160841	389	64160541	3.45	2.478	2.78474	0	P53_nolc_peak_540
13	64165784	64166553	770	64165880	4.31	3.23459	3.21179	0	P53_nolc_peak_541
13	64168725	64168984	260	64168794	3.02	2.71475	2.65584	0	P53_nolc_peak_542
13	64169215	64169461	247	64169352	4.75	3.60294	3.72515	0	P53_nolc_peak_543
13	64169752	64169938	187	64169922	3.45	2.478	2.78474	0	P53_nolc_peak_544
13	64170655	64170960	306	64170790	3.02	2.57739	2.5751	0	P53_nolc_peak_545
13	64181180	64181375	196	64181316	3.45	2.34139	2.69031	0	P53_nolc_peak_546
13	64199889	64200111	223	64199930	4.31	2.43654	2.65695	0	P53_nolc_peak_547
13	64201703	64201927	225	64201807	3.88	2.34139	2.95105	0	P53_nolc_peak_548
13	64202518	64202945	428	64202789	3.88	2.34139	2.95105	0	P53_nolc_peak_549
13	64205061	64205277	217	64205106	3.02	2.57739	2.5751	0	P53_nolc_peak_550
13	64238734	64238988	255	64238913	5.18	3.22608	3.08834	0	P53_nolc_peak_551
13	64244857	64245315	459	64245193	4.75	3.71098	3.79592	0	P53_nolc_peak_552
13	64246216	64246825	610	64246477	3.88	2.57739	3.12781	0	P53_nolc_peak_553
13	64247468	64247913	446	64247534	4.31	3.71098	3.5109	0	P53_nolc_peak_554
13	64248483	64248737	255	64248578	3.02	2.71475	2.65584	0	P53_nolc_peak_555
13	64249589	64249775	187	64249762	3.88	2.71475	3.22588	0	P53_nolc_peak_556
13	64259453	64259656	204	64259563	6.9	4.07966	3.95112	0	P53_nolc_peak_557
13	64277489	64277825	337	64277554	5.18	3.56737	3.32044	0	P53_nolc_peak_558
13	64291634	64291944	311	64291722	3.88	2.68449	3.20459	0	P53_nolc_peak_559
13	64309652	64309847	196	64309752	5.61	4.78414	4.36596	0.189606	P53_nolc_peak_560
13	64310931	64311180	250	64311104	3.88	2.71475	3.22588	0	P53_nolc_peak_561
13	64311363	64311654	292	64311455	6.04	5.92283	4.65098	1.05432	P53_nolc_peak_562
13	64312660	64312997	338	64312820	4.31	3.71098	3.5109	0	P53_nolc_peak_563
13	64314290	64314476	187	64314347	3.02	2.5268	2.54462	0	P53_nolc_peak_564
13	64314631	64314913	283	64314796	5.18	4.01036	3.61083	0	P53_nolc_peak_565
13	64321918	64322358	441	64322197	4.75	3.29088	3.51222	0	P53_nolc_peak_566
13	64323123	64323400	278	64323166	3.88	2.5268	3.09079	0	P53_nolc_peak_567
13	64324580	64324874	295	64324760	3.45	2.71475	2.94086	0	P53_nolc_peak_568
13	64325072	64325390	319	64325252	4.31	3.71098	3.5109	0	P53_nolc_peak_569
13	64327230	64327720	491	64327575	3.45	2.71475	2.94086	0	P53_nolc_peak_570
13	64332116	64332386	271	64332315	4.31	3.71098	3.5109	0	P53_nolc_peak_571
13	64333236	64333576	341	64333340	4.31	3.71098	3.5109	0	P53_nolc_peak_572
13	64333892	64334204	313	64334001	4.31	3.71098	3.5109	0	P53_nolc_peak_573
13	64335154	64335512	359	64335303	3.45	2.71475	2.94086	0	P53_nolc_peak_574
13	64337280	64337924	645	64337593	4.31	2.43654	2.65695	0	P53_nolc_peak_575
13	64353887	64354073	187	64353930	3.45	2.71475	2.94086	0	P53_nolc_peak_576
13	64355874	64356174	301	64355963	4.31	2.43654	2.65695	0	P53_nolc_peak_577
13	64358220	64358409	190	64358375	3.02	2.34139	2.42958	0	P53_nolc_peak_578
13	64358660	64358864	205	64358841	5.18	3.22608	3.08834	0	P53_nolc_peak_579
13	64417674	64418014	341	64417841	4.75	3.71098	3.79592	0	P53_nolc_peak_580
13	64418896	64419312	417	64419153	6.04	5.92283	4.65098	1.05432	P53_nolc_peak_581
13	64435368	64435554	187	64435443	3.02	2.57739	2.5751	0	P53_nolc_peak_582
13	64438082	64438561	480	64438156	4.31	3.71098	3.5109	0	P53_nolc_peak_583
13	64439306	64439568	263	64439458	3.02	2.43091	2.48577	0	P53_nolc_peak_584
13	64440241	64440612	372	64440541	3.45	2.3854	2.72107	0	P53_nolc_peak_585
13	64472265	64472548	284	64472434	4.75	2.43654	2.87265	0	P53_nolc_peak_586
13	64527717	64527934	218	64527812	5.18	4.57131	3.95688	0.0864371	P53_nolc_peak_587
13	64528670	64528944	275	64528716	3.02	2.3854	2.45735	0	P53_nolc_peak_588
13	64706184	64706409	226	64706229	4.75	2.43654	2.87265	0	P53_nolc_peak_589
13	64708946	64709439	494	64709309	5.61	3.22608	3.30404	0	P53_nolc_peak_590
13	64795611	64795920	310	64795785	5.18	4.78414	4.08094	0.189606	P53_nolc_peak_591
13	64798125	64798311	187	64798182	3.02	2.71475	2.65584	0	P53_nolc_peak_592
13	64800032	64800218	187	64800183	4.31	3.536	3.40417	0	P53_nolc_peak_593
13	64815708	64816053	346	64815865	3.45	2.71475	2.94086	0	P53_nolc_peak_594
13	64852100	64852365	266	64852328	3.88	2.478	3.05463	0	P53_nolc_peak_595
13	64866454	64866761	308	64866581	4.75	3.29088	3.51222	0	P53_nolc_peak_596
13	64899507	64899832	326	64899594	5.18	3.89043	3.53357	0	P53_nolc_peak_597
13	64901611	64901938	328	64901679	4.31	2.43654	2.65695	0	P53_nolc_peak_598
13	64947135	64947407	273	64947346	3.02	2.71475	2.65584	0	P53_nolc_peak_599
13	64997385	64997644	260	64997455	3.88	2.5268	3.09079	0	P53_nolc_peak_600
13	65002934	65003120	187	65003037	4.75	2.43654	2.87265	0	P53_nolc_peak_601
13	65005979	65006235	257	65006115	3.88	2.71475	3.22588	0	P53_nolc_peak_602
13	65008840	65009318	479	65009006	4.75	3.536	3.68052	0	P53_nolc_peak_603a
13	65008840	65009318	479	65009176	3.45	2.57739	2.85146	0	P53_nolc_peak_603b
13	65011228	65011414	187	65011392	3.45	2.71475	2.94086	0	P53_nolc_peak_604
13	65068173	65068586	414	65068346	4.75	2.43654	2.87265	0	P53_nolc_peak_605
13	65169820	65170131	312	65170023	3.88	2.68449	3.20459	0	P53_nolc_peak_606
13	65302796	65303080	285	65302985	3.02	2.478	2.51485	0	P53_nolc_peak_607
13	65315810	65316364	555	65315954	3.88	2.71475	3.22588	0	P53_nolc_peak_608
13	65402021	65402430	410	65402085	3.02	2.62991	2.60632	0	P53_nolc_peak_609
13	65403060	65403272	213	65403156	4.75	3.34904	3.55284	0	P53_nolc_peak_610
13	65473281	65473470	190	65473439	5.18	3.22608	3.08834	0	P53_nolc_peak_611
13	65478480	65478776	297	65478738	5.61	3.83295	3.74035	0	P53_nolc_peak_612
13	65505634	65505832	199	65505728	3.88	2.71475	3.22588	0	P53_nolc_peak_613
13	65506149	65506397	249	65506274	5.18	4.78414	4.08094	0.189606	P53_nolc_peak_614
13	65507270	65507523	254	65507387	3.45	2.62991	2.88603	0	P53_nolc_peak_615
13	65540260	65540568	309	65540462	3.88	2.68449	3.20459	0	P53_nolc_peak_616
13	65576797	65577129	333	65577027	3.88	2.57739	3.12781	0	P53_nolc_peak_617
13	65636627	65636813	187	65636685	3.45	2.71475	2.94086	0	P53_nolc_peak_618
13	65726633	65726819	187	65726792	6.04	4.25964	3.63797	0	P53_nolc_peak_619
13	65732897	65733152	256	65733009	4.31	2.67407	2.8282	0	P53_nolc_peak_620
13	65741038	65741612	575	65741239	6.04	4.25964	3.63797	0	P53_nolc_peak_621
13	65744869	65745088	220	65744980	4.75	2.97787	3.28678	0	P53_nolc_peak_622
13	65776067	65776338	272	65776151	4.31	3.18007	3.17589	0	P53_nolc_peak_623
13	65785526	65785753	228	65785698	3.88	2.62991	3.16574	0	P53_nolc_peak_624
13	65796981	65797167	187	65797058	3.45	2.71475	2.94086	0	P53_nolc_peak_625
13	65880011	65880379	369	65880267	3.88	2.34139	2.95105	0	P53_nolc_peak_626
13	65966457	65966658	202	65966606	3.88	2.57739	3.12781	0	P53_nolc_peak_627
13	66001705	66002108	404	66001889	3.02	2.478	2.51485	0	P53_nolc_peak_628
13	66003740	66003964	225	66003903	3.88	2.34139	2.95105	0	P53_nolc_peak_629
13	66032894	66033130	237	66033057	4.75	3.23459	3.47253	0	P53_nolc_peak_630
13	66083144	66083330	187	66083272	3.45	2.71475	2.94086	0	P53_nolc_peak_631
13	66462528	66462723	196	66462713	3.45	2.3854	2.72107	0	P53_nolc_peak_632
13	66529070	66529343	274	66529243	6.9	4.10351	3.96878	0	P53_nolc_peak_633
13	66706256	66706448	193	66706329	3.88	2.3854	2.98479	0	P53_nolc_peak_634
13	66835178	66835698	521	66835330	10.78	5.08049	3.92825	0.422955	P53_nolc_peak_635
13	66992583	66992895	313	66992745	8.63	6.33137	5.07368	1.39696	P53_nolc_peak_636
13	67377545	67377863	319	67377710	19.84	17.32	9.48833	11.2967	P53_nolc_peak_637
13	67396993	67397325	333	67397053	5.61	3.77702	3.70117	0	P53_nolc_peak_638
13	67552973	67553423	451	67553082	3.88	2.34139	2.95105	0	P53_nolc_peak_639
13	67556904	67557175	272	67557060	3.88	2.57739	3.12781	0	P53_nolc_peak_640
13	68125311	68125509	199	68125398	5.61	3.16325	3.25762	0	P53_nolc_peak_641
13	68147740	68148100	361	68147859	4.31	3.536	3.40417	0	P53_nolc_peak_642
13	68272440	68272842	403	68272491	4.75	2.32117	2.78101	0	P53_nolc_peak_643
13	68355766	68355998	233	68355889	3.02	2.57739	2.5751	0	P53_nolc_peak_644
13	68951374	68951560	187	68951518	3.88	2.478	3.05463	0	P53_nolc_peak_645
13	69069847	69070053	207	69069937	4.75	3.71098	3.79592	0	P53_nolc_peak_646
13	69109906	69110221	316	69110111	3.88	2.71475	3.22588	0	P53_nolc_peak_647
13	69975030	69975220	191	69975117	3.45	2.71475	2.94086	0	P53_nolc_peak_648
13	70035741	70035927	187	70035860	3.88	2.71475	3.22588	0	P53_nolc_peak_649
13	70065170	70065356	187	70065345	3.88	2.57739	3.12781	0	P53_nolc_peak_650
13	70281839	70282067	229	70281896	4.31	2.43654	2.65695	0	P53_nolc_peak_651
13	70383437	70383733	297	70383704	4.31	3.536	3.40417	0	P53_nolc_peak_652
13	70683516	70683715	200	70683610	3.88	2.34139	2.95105	0	P53_nolc_peak_653
13	70756311	70756576	266	70756475	3.45	2.71475	2.94086	0	P53_nolc_peak_654
13	70834094	70834340	247	70834189	3.45	2.71475	2.94086	0	P53_nolc_peak_655
13	70888694	70888996	303	70888833	3.88	2.57739	3.12781	0	P53_nolc_peak_656
13	70938396	70938676	281	70938650	3.45	2.71475	2.94086	0	P53_nolc_peak_657
13	71209901	71210155	255	71210054	3.02	2.5268	2.54462	0	P53_nolc_peak_658
13	71377587	71377773	187	71377761	3.45	2.5268	2.8177	0	P53_nolc_peak_659
13	71621520	71621706	187	71621603	3.45	2.57739	2.85146	0	P53_nolc_peak_660
13	71644537	71644744	208	71644642	3.45	2.68449	2.92145	0	P53_nolc_peak_661
13	71715022	71715378	357	71715087	3.02	2.43091	2.48577	0	P53_nolc_peak_662
13	71867019	71867813	795	71867411	5.18	4.2727	3.77594	0	P53_nolc_peak_663a
13	71867019	71867813	795	71867744	5.18	4.34361	3.81961	0	P53_nolc_peak_663b
13	72006469	72006672	204	72006627	4.31	3.34904	3.28607	0	P53_nolc_peak_664
13	72195275	72195573	299	72195500	3.88	2.71475	3.22588	0	P53_nolc_peak_665
13	72256059	72256245	187	72256143	3.02	2.71475	2.65584	0	P53_nolc_peak_666
13	73513810	73514067	258	73513963	13.8	10.6942	6.97667	5.15436	P53_nolc_peak_667
13	74288011	74288197	187	74288142	3.88	2.62991	3.16574	0	P53_nolc_peak_668
13	74324985	74325383	399	74325291	4.75	3.536	3.68052	0	P53_nolc_peak_669
13	74328773	74329035	263	74328856	3.45	2.5268	2.8177	0	P53_nolc_peak_670
13	74688014	74688251	238	74688144	3.45	2.71475	2.94086	0	P53_nolc_peak_671
13	74822235	74822421	187	74822305	3.88	2.57739	3.12781	0	P53_nolc_peak_672
13	75131104	75131290	187	75131204	3.88	2.57739	3.12781	0	P53_nolc_peak_673
13	75571845	75572113	269	75571973	11.22	7.60345	5.16517	2.45894	P53_nolc_peak_674
13	76336226	76336420	195	76336378	3.88	2.71475	3.22588	0	P53_nolc_peak_675
13	77918539	77918725	187	77918616	3.45	2.71475	2.94086	0	P53_nolc_peak_676
13	78681601	78681955	355	78681824	4.31	3.60294	3.44544	0	P53_nolc_peak_677
13	78778062	78778541	480	78778219	4.31	3.71098	3.5109	0	P53_nolc_peak_678
13	79621479	79621698	220	79621580	3.88	2.478	3.05463	0	P53_nolc_peak_679
13	79647719	79647921	203	79647829	4.75	3.34904	3.55284	0	P53_nolc_peak_680
13	79907738	79907993	256	79907781	3.02	2.478	2.51485	0	P53_nolc_peak_681
13	79918634	79918851	218	79918750	7.33	3.77842	3.3388	0	P53_nolc_peak_682
13	80048919	80049138	220	80049050	5.61	3.66951	3.62523	0	P53_nolc_peak_683
13	80502507	80502784	278	80502610	4.31	3.71098	3.5109	0	P53_nolc_peak_684
13	80604562	80604817	256	80604607	3.02	2.57739	2.5751	0	P53_nolc_peak_685
13	80858426	80858733	308	80858558	3.88	2.5268	3.09079	0	P53_nolc_peak_686
13	80882022	80882460	439	80882366	4.75	3.71098	3.79592	0	P53_nolc_peak_687
13	80939486	80939672	187	80939528	3.45	2.71475	2.94086	0	P53_nolc_peak_688
13	81034241	81034526	286	81034406	3.45	2.5268	2.8177	0	P53_nolc_peak_689
13	81042448	81042676	229	81042586	3.45	2.43091	2.75253	0	P53_nolc_peak_690
13	81044893	81045079	187	81044971	3.02	2.62991	2.60632	0	P53_nolc_peak_691
13	81400794	81400980	187	81400846	3.02	2.71475	2.65584	0	P53_nolc_peak_692
13	81421674	81421983	310	81421760	3.88	2.71475	3.22588	0	P53_nolc_peak_693
13	81476175	81476361	187	81476267	3.02	2.478	2.51485	0	P53_nolc_peak_694
13	81596956	81597239	284	81597191	3.02	2.71475	2.65584	0	P53_nolc_peak_695
13	81946810	81946996	187	81946856	3.88	2.71475	3.22588	0	P53_nolc_peak_696
13	82036233	82036419	187	82036385	3.02	2.71475	2.65584	0	P53_nolc_peak_697
13	82154576	82154773	198	82154684	3.45	2.71475	2.94086	0	P53_nolc_peak_698
13	82184201	82184387	187	82184351	3.45	2.57739	2.85146	0	P53_nolc_peak_699
13	82224645	82224922	278	82224708	3.45	2.71475	2.94086	0	P53_nolc_peak_700
13	82447963	82448149	187	82448052	3.88	2.71475	3.22588	0	P53_nolc_peak_701
13	82501790	82501977	188	82501933	3.45	2.71475	2.94086	0	P53_nolc_peak_702
13	82513001	82513357	357	82513090	3.45	2.3854	2.72107	0	P53_nolc_peak_703
13	82519441	82519627	187	82519556	3.02	2.71475	2.65584	0	P53_nolc_peak_704
13	82547788	82547998	211	82547887	3.45	2.71475	2.94086	0	P53_nolc_peak_705
13	82772094	82772351	258	82772141	3.02	2.71475	2.65584	0	P53_nolc_peak_706
13	82833922	82834194	273	82834149	3.02	2.71475	2.65584	0	P53_nolc_peak_707
13	82836259	82836519	261	82836323	3.02	2.71475	2.65584	0	P53_nolc_peak_708
13	83101019	83101279	261	83101255	3.88	2.71475	3.22588	0	P53_nolc_peak_709
13	83125590	83125857	268	83125739	4.31	3.71098	3.5109	0	P53_nolc_peak_710
13	83183281	83183607	327	83183324	3.45	2.43091	2.75253	0	P53_nolc_peak_711
13	83219636	83219822	187	83219724	3.45	2.71475	2.94086	0	P53_nolc_peak_712
13	83256377	83256563	187	83256469	4.31	3.60294	3.44544	0	P53_nolc_peak_713
13	83270283	83270483	201	83270416	3.88	2.71475	3.22588	0	P53_nolc_peak_714
13	83295693	83295993	301	83295757	3.45	2.57739	2.85146	0	P53_nolc_peak_715
13	83358438	83358624	187	83358607	3.45	2.71475	2.94086	0	P53_nolc_peak_716
13	83429593	83429779	187	83429728	3.88	2.71475	3.22588	0	P53_nolc_peak_717
13	83508571	83508757	187	83508710	3.45	2.71475	2.94086	0	P53_nolc_peak_718
13	83563109	83563300	192	83563229	3.88	2.71475	3.22588	0	P53_nolc_peak_719
13	83628303	83628500	198	83628404	5.18	4.78414	4.08094	0.189606	P53_nolc_peak_720
13	83679179	83679457	279	83679353	4.75	3.71098	3.79592	0	P53_nolc_peak_721
13	83696389	83696575	187	83696466	3.45	2.71475	2.94086	0	P53_nolc_peak_722
13	83709917	83710198	282	83710049	4.31	3.71098	3.5109	0	P53_nolc_peak_723
13	83767689	83767875	187	83767768	3.88	2.71475	3.22588	0	P53_nolc_peak_724
13	83777407	83777593	187	83777483	3.02	2.71475	2.65584	0	P53_nolc_peak_725
13	83864456	83864666	211	83864523	3.45	2.71475	2.94086	0	P53_nolc_peak_726
13	83869890	83870076	187	83869971	3.02	2.71475	2.65584	0	P53_nolc_peak_727
13	83881933	83882170	238	83882063	4.31	3.71098	3.5109	0	P53_nolc_peak_728
13	83941731	83942041	311	83941881	10.35	9.28528	6.49506	3.92368	P53_nolc_peak_729
13	84127146	84127459	314	84127193	3.02	2.71475	2.65584	0	P53_nolc_peak_730
13	84300766	84300952	187	84300865	4.75	3.71098	3.79592	0	P53_nolc_peak_731
13	84676068	84676291	224	84676201	3.02	2.71475	2.65584	0	P53_nolc_peak_732
13	84870466	84870744	279	84870554	3.02	2.71475	2.65584	0	P53_nolc_peak_733
13	85030306	85030571	266	85030468	4.31	3.47147	3.36387	0	P53_nolc_peak_734
13	86000568	86000774	207	86000673	6.47	4.07966	3.73543	0	P53_nolc_peak_735
13	86060794	86061011	218	86060969	4.31	3.71098	3.5109	0	P53_nolc_peak_736
13	86123399	86123684	286	86123528	4.31	3.71098	3.5109	0	P53_nolc_peak_737
13	87355511	87355854	344	87355640	4.31	3.536	3.40417	0	P53_nolc_peak_738
13	87454549	87454846	298	87454720	3.88	2.71475	3.22588	0	P53_nolc_peak_739
13	87527792	87527978	187	87527845	3.45	2.71475	2.94086	0	P53_nolc_peak_740
13	87577149	87577335	187	87577312	3.88	2.71475	3.22588	0	P53_nolc_peak_741
13	87934893	87935105	213	87934938	3.02	2.57739	2.5751	0	P53_nolc_peak_742
13	88097584	88097907	324	88097633	3.45	2.478	2.78474	0	P53_nolc_peak_743
13	88329385	88329571	187	88329458	3.88	2.71475	3.22588	0	P53_nolc_peak_744
13	88590309	88590598	290	88590423	3.45	2.71475	2.94086	0	P53_nolc_peak_745
13	88694079	88694272	194	88694184	3.45	2.62991	2.88603	0	P53_nolc_peak_746
13	88699408	88699687	280	88699472	3.02	2.62991	2.60632	0	P53_nolc_peak_747
13	88710311	88710685	375	88710366	3.88	2.3854	2.98479	0	P53_nolc_peak_748
13	88738578	88738845	268	88738671	3.02	2.57739	2.5751	0	P53_nolc_peak_749
13	88821866	88822234	369	88822071	3.02	2.71475	2.65584	0	P53_nolc_peak_750
13	88841250	88841562	313	88841402	5.18	4.57131	3.95688	0.0864371	P53_nolc_peak_751
13	88886115	88886467	353	88886203	3.45	2.57739	2.85146	0	P53_nolc_peak_752
13	88897423	88897609	187	88897532	3.88	2.71475	3.22588	0	P53_nolc_peak_753
13	88909068	88909448	381	88909112	3.02	2.71475	2.65584	0	P53_nolc_peak_754
13	88979207	88979483	277	88979393	4.75	3.71098	3.79592	0	P53_nolc_peak_755
13	88994989	88995293	305	88995126	4.31	2.43654	2.65695	0	P53_nolc_peak_756
13	89143120	89143376	257	89143228	3.88	2.68449	3.20459	0	P53_nolc_peak_757
13	89167526	89167887	362	89167781	5.18	4.78414	4.08094	0.189606	P53_nolc_peak_758
13	89218706	89218892	187	89218795	3.88	2.62991	3.16574	0	P53_nolc_peak_759
13	89256889	89257121	233	89256981	3.02	2.71475	2.65584	0	P53_nolc_peak_760
13	89270692	89270906	215	89270745	3.02	2.71475	2.65584	0	P53_nolc_peak_761
13	89346933	89347165	233	89346999	3.45	2.57739	2.85146	0	P53_nolc_peak_762
13	89623497	89623727	231	89623654	3.02	2.71475	2.65584	0	P53_nolc_peak_763
13	89803870	89804109	240	89804010	3.45	2.57739	2.85146	0	P53_nolc_peak_764
13	89962092	89962305	214	89962139	3.02	2.71475	2.65584	0	P53_nolc_peak_765
13	90014737	90014923	187	90014791	3.45	2.71475	2.94086	0	P53_nolc_peak_766
13	90136983	90137316	334	90137057	3.02	2.71475	2.65584	0	P53_nolc_peak_767
13	90365830	90366101	272	90365919	5.18	4.78414	4.08094	0.189606	P53_nolc_peak_768
13	90591944	90592251	308	90592091	6.47	5.92283	4.936	1.05432	P53_nolc_peak_769
13	91123626	91123828	203	91123805	3.45	2.57739	2.85146	0	P53_nolc_peak_770
13	91312922	91313148	227	91313018	3.45	2.71475	2.94086	0	P53_nolc_peak_771
13	91944688	91944889	202	91944712	3.45	2.57739	2.85146	0	P53_nolc_peak_772
13	91996073	91996259	187	91996219	3.88	2.478	3.05463	0	P53_nolc_peak_773
13	92136939	92137125	187	92136999	3.45	2.68449	2.92145	0	P53_nolc_peak_774
13	92305347	92305533	187	92305460	3.45	2.71475	2.94086	0	P53_nolc_peak_775
13	92390292	92390520	229	92390388	4.75	3.34904	3.55284	0	P53_nolc_peak_776
13	92824546	92824839	294	92824698	3.88	2.71475	3.22588	0	P53_nolc_peak_777
13	92827493	92827679	187	92827580	3.88	2.71475	3.22588	0	P53_nolc_peak_778
13	93217653	93217944	292	93217790	10.35	9.39883	6.5653	4.01995	P53_nolc_peak_779
13	93228375	93228597	223	93228475	6.47	4.86783	4.27395	0.251826	P53_nolc_peak_780
13	99970832	99971018	187	99970936	4.31	3.71098	3.5109	0	P53_nolc_peak_781
13	108754078	108754367	290	108754216	9.49	9.65634	6.93115	4.20284	P53_nolc_peak_782
14	18697887	18698074	188	18698059	3.88	2.5268	3.09079	0	P53_nolc_peak_783
14	19162348	19162597	250	19162437	3.45	2.71475	2.94086	0	P53_nolc_peak_784
14	19163879	19164447	569	19163974	4.75	3.71098	3.79592	0	P53_nolc_peak_785a
14	19163879	19164447	569	19164334	4.31	3.4092	3.32451	0	P53_nolc_peak_785b
14	19344651	19344837	187	19344762	4.31	3.71098	3.5109	0	P53_nolc_peak_786
14	19345501	19345745	245	19345613	5.61	4.78414	4.36596	0.189606	P53_nolc_peak_787
14	20609278	20609723	446	20609369	6.47	5.67202	4.78594	0.925403	P53_nolc_peak_788a
14	20609278	20609723	446	20609627	6.47	4.86783	4.27395	0.251826	P53_nolc_peak_788b
14	20610075	20610346	272	20610280	3.88	2.57739	3.12781	0	P53_nolc_peak_789
14	20613321	20613944	624	20613446	5.18	4.78414	4.08094	0.189606	P53_nolc_peak_790a
14	20613321	20613944	624	20613743	6.9	5.92283	5.22102	1.05432	P53_nolc_peak_790b
14	20625306	20625716	411	20625425	3.88	2.57739	3.12781	0	P53_nolc_peak_791
14	20631010	20631335	326	20631197	4.31	3.23459	3.21179	0	P53_nolc_peak_792
14	20632925	20633121	197	20633018	7.33	5.19801	4.30679	0.524824	P53_nolc_peak_793
14	20683331	20683652	322	20683522	3.88	2.71475	3.22588	0	P53_nolc_peak_794
14	20683956	20684203	248	20684079	6.04	5.92283	4.65098	1.05432	P53_nolc_peak_795
14	20820385	20820571	187	20820488	4.75	3.71098	3.79592	0	P53_nolc_peak_796
14	22537021	22537237	217	22537124	6.9	4.25964	4.08385	0	P53_nolc_peak_797
14	22929612	22929837	226	22929714	7.33	4.98931	4.16682	0.344917	P53_nolc_peak_798
14	23071441	23071765	325	23071752	3.88	2.71475	3.22588	0	P53_nolc_peak_799
14	31462453	31462743	291	31462599	6.04	5.31969	4.30338	0.632932	P53_nolc_peak_800
14	32202113	32202314	202	32202190	4.31	3.536	3.40417	0	P53_nolc_peak_801
14	34297897	34298103	207	34297985	5.61	4.73731	4.33715	0.189606	P53_nolc_peak_802
14	34843252	34843521	270	34843383	10.78	7.95522	5.86365	2.77007	P53_nolc_peak_803
14	37171955	37172142	188	37172041	3.02	2.71475	2.65584	0	P53_nolc_peak_804
14	37448236	37448422	187	37448303	3.88	2.3854	2.98479	0	P53_nolc_peak_805
14	45793163	45793378	216	45793275	6.04	5.92283	4.65098	1.05432	P53_nolc_peak_806
14	49862678	49862968	291	49862865	6.9	3.95712	3.86003	0	P53_nolc_peak_807
14	50061192	50061379	188	50061277	6.04	5.92283	4.65098	1.05432	P53_nolc_peak_808
14	50600214	50600472	259	50600324	5.18	4.07298	3.65074	0	P53_nolc_peak_809
14	50955525	50955711	187	50955621	4.31	2.59681	2.773	0	P53_nolc_peak_810
14	53047685	53047975	291	53047703	3.45	2.71475	2.94086	0	P53_nolc_peak_811
14	57269042	57269253	212	57269210	4.31	3.71098	3.5109	0	P53_nolc_peak_812
14	58288338	58288524	187	58288425	5.18	4.2727	3.77594	0	P53_nolc_peak_813
14	60655855	60656174	320	60656009	3.88	2.71475	3.22588	0	P53_nolc_peak_814
14	60656481	60656689	209	60656590	3.45	2.68449	2.92145	0	P53_nolc_peak_815
14	61125851	61126056	206	61125957	4.75	3.71098	3.79592	0	P53_nolc_peak_816
14	62692221	62692414	194	62692314	5.61	4.78414	4.36596	0.189606	P53_nolc_peak_817
14	63543478	63543685	208	63543631	4.31	3.34904	3.28607	0	P53_nolc_peak_818
14	63677980	63678239	260	63678148	6.04	4.05368	3.50257	0	P53_nolc_peak_819
14	64680320	64680535	216	64680435	6.9	3.60706	3.59716	0	P53_nolc_peak_820
14	66104553	66104799	247	66104667	6.47	5.92283	4.936	1.05432	P53_nolc_peak_821
14	66932658	66932891	234	66932774	6.47	5.76803	4.84397	1.01322	P53_nolc_peak_822
14	68042733	68042919	187	68042828	5.18	4.49276	3.91004	0.0325609	P53_nolc_peak_823
14	68140430	68140655	226	68140545	4.75	3.71098	3.79592	0	P53_nolc_peak_824
14	68792725	68793039	315	68792930	3.88	2.57739	3.12781	0	P53_nolc_peak_825
14	71321971	71322157	187	71322071	4.31	3.29088	3.2485	0	P53_nolc_peak_826
14	71638944	71639130	187	71639099	4.75	3.71098	3.79592	0	P53_nolc_peak_827
14	71774094	71774308	215	71774197	5.18	3.89043	3.53357	0	P53_nolc_peak_828
14	75259314	75259517	204	75259362	4.75	2.55954	2.96914	0	P53_nolc_peak_829
14	76070561	76070747	187	76070612	3.02	2.71475	2.65584	0	P53_nolc_peak_830
14	76959335	76959605	271	76959487	10.35	9.17473	6.42632	3.82582	P53_nolc_peak_831
14	77023217	77023463	247	77023315	6.47	4.42671	3.97619	0	P53_nolc_peak_832
14	79159781	79159986	206	79159883	5.61	4.78414	4.36596	0.189606	P53_nolc_peak_833
14	88551409	88551641	233	88551505	4.75	3.71098	3.79592	0	P53_nolc_peak_834
14	89428836	89429062	227	89428960	8.2	5.94877	4.59821	1.05594	P53_nolc_peak_835
14	90382987	90383654	668	90383431	5.18	4.78414	4.08094	0.189606	P53_nolc_peak_836
14	90569562	90569775	214	90569680	6.04	5.67202	4.50959	0.925403	P53_nolc_peak_837
14	91509353	91509603	251	91509493	9.92	5.90447	4.73018	1.05432	P53_nolc_peak_838
14	92039977	92040378	402	92040313	4.75	3.71098	3.79592	0	P53_nolc_peak_839
14	92103491	92103680	190	92103580	8.2	5.94877	4.59821	1.05594	P53_nolc_peak_840
14	94320373	94320559	187	94320432	3.88	2.71475	3.22588	0	P53_nolc_peak_841
14	99332474	99333508	1035	99332730	9.06	7.21944	5.19855	2.10362	P53_nolc_peak_842a
14	99332474	99333508	1035	99333051	9.06	6.95302	5.0296	1.92273	P53_nolc_peak_842b
14	99332474	99333508	1035	99333260	10.35	7.99793	5.67669	2.80268	P53_nolc_peak_842c
14	99484202	99484461	260	99484319	6.9	5.67202	5.0623	0.925403	P53_nolc_peak_843
14	100471997	100472257	261	100472044	3.02	2.71475	2.65584	0	P53_nolc_peak_844
14	100476571	100476757	187	100476642	3.88	2.57739	3.12781	0	P53_nolc_peak_845
14	101809749	101810146	398	101809994	3.88	2.5268	3.09079	0	P53_nolc_peak_846
14	103513041	103513362	322	103513093	3.02	2.43091	2.48577	0	P53_nolc_peak_847
14	104746918	104747135	218	104747099	4.75	2.97787	3.28678	0	P53_nolc_peak_848
14	105490915	105491157	243	105490973	5.18	2.30572	2.4381	0	P53_nolc_peak_849
14	105568233	105568545	313	105568361	10.35	7.56913	5.39788	2.4261	P53_nolc_peak_850
14	106330540	106330738	199	106330638	4.31	3.71098	3.5109	0	P53_nolc_peak_851
14	106335062	106335262	201	106335122	4.31	2.55954	2.7462	0	P53_nolc_peak_852
14	106356564	106356757	194	106356651	3.88	2.71475	3.22588	0	P53_nolc_peak_853
15	19500832	19501044	213	19500950	11.22	9.08008	6.10808	3.74031	P53_nolc_peak_854
15	20302649	20302835	187	20302737	3.45	2.71475	2.94086	0	P53_nolc_peak_855
15	20391844	20392030	187	20391925	3.45	2.71475	2.94086	0	P53_nolc_peak_856
15	21110594	21110780	187	21110742	4.75	2.43654	2.87265	0	P53_nolc_peak_857
15	22821414	22821829	416	22821704	6.04	5.16001	4.20719	0.492089	P53_nolc_peak_858
15	49625752	49626031	280	49625903	6.47	5.92283	4.936	1.05432	P53_nolc_peak_859
15	52558173	52558367	195	52558266	3.88	2.71475	3.22588	0	P53_nolc_peak_860
15	55740969	55741182	214	55741087	3.45	2.71475	2.94086	0	P53_nolc_peak_861
15	60648503	60648731	229	60648627	6.04	5.92283	4.65098	1.05432	P53_nolc_peak_862
15	62262643	62262916	274	62262796	4.75	3.71098	3.79592	0	P53_nolc_peak_863
15	63157149	63157335	187	63157276	6.04	4.25964	3.63797	0	P53_nolc_peak_864
15	67839872	67840113	242	67839933	4.75	2.79744	3.15191	0	P53_nolc_peak_865
15	68271941	68272287	347	68272120	12.08	12.7681	8.08789	7.05407	P53_nolc_peak_866
15	68785564	68785792	229	68785690	6.47	5.16001	4.46501	0.492089	P53_nolc_peak_867
15	70526493	70526774	282	70526571	4.31	2.43654	2.65695	0	P53_nolc_peak_868
15	71355300	71355531	232	71355411	7.33	5.90182	4.76753	1.05432	P53_nolc_peak_869
15	71364154	71364373	220	71364260	9.06	5.69233	4.21982	0.944961	P53_nolc_peak_870
15	72231107	72231426	320	72231343	8.63	2.41987	2.40695	0	P53_nolc_peak_871
15	72474167	72474437	271	72474250	4.31	2.48758	2.69413	0	P53_nolc_peak_872
15	73165861	73166082	222	73165965	9.92	6.95302	5.46099	1.92273	P53_nolc_peak_873
15	73523926	73524112	187	73524026	5.18	4.57131	3.95688	0.0864371	P53_nolc_peak_874
15	74100054	74100391	338	74100303	4.31	3.71098	3.5109	0	P53_nolc_peak_875
15	74263590	74263804	215	74263690	8.2	3.62443	3.06547	0	P53_nolc_peak_876
15	75274481	75274667	187	75274543	3.45	2.71475	2.94086	0	P53_nolc_peak_877
15	75368564	75368785	222	75368697	6.47	4.07966	3.73543	0	P53_nolc_peak_878
15	77910687	77910908	222	77910749	3.88	2.5268	3.09079	0	P53_nolc_peak_879
15	81432997	81433183	187	81433109	3.45	2.71475	2.94086	0	P53_nolc_peak_880
15	81641721	81641917	197	81641771	3.02	2.3854	2.45735	0	P53_nolc_peak_881
15	82022139	82022329	191	82022203	6.04	2.34354	2.34649	0	P53_nolc_peak_882
15	82343165	82343437	273	82343321	6.04	5.67202	4.50959	0.925403	P53_nolc_peak_883
15	82536044	82536501	458	82536144	5.18	3.20424	3.07328	0	P53_nolc_peak_884
15	82742190	82742404	215	82742257	6.04	3.30473	3.00011	0	P53_nolc_peak_885
15	84470342	84470541	200	84470416	4.75	2.43654	2.87265	0	P53_nolc_peak_886
15	88621288	88621474	187	88621465	7.33	2.9599	2.77788	0	P53_nolc_peak_887
15	89243664	89243850	187	89243817	4.75	2.43654	2.87265	0	P53_nolc_peak_888
15	89335011	89335391	381	89335091	6.04	3.77533	3.31737	0	P53_nolc_peak_889
15	89893917	89894104	188	89894006	5.61	2.66758	2.88524	0	P53_nolc_peak_890
15	92903881	92904745	865	92904111	5.18	4.57131	3.95688	0.0864371	P53_nolc_peak_891a
15	92903881	92904745	865	92904403	6.9	4.07966	3.95112	0	P53_nolc_peak_891b
15	92949963	92950192	230	92950087	7.33	6.23925	4.98066	1.31621	P53_nolc_peak_892
15	94075240	94075534	295	94075351	3.88	2.71475	3.22588	0	P53_nolc_peak_893
15	96171217	96171403	187	96171270	3.02	2.43091	2.48577	0	P53_nolc_peak_894
15	96340392	96340627	236	96340549	3.45	2.43091	2.75253	0	P53_nolc_peak_895
15	96342270	96342456	187	96342347	3.45	2.478	2.78474	0	P53_nolc_peak_896
15	96694141	96694417	277	96694293	5.18	4.78414	4.08094	0.189606	P53_nolc_peak_897
15	97814608	97814799	192	97814711	4.75	3.536	3.68052	0	P53_nolc_peak_898
15	98321997	98322209	213	98322099	6.04	5.92283	4.65098	1.05432	P53_nolc_peak_899
15	98620272	98620688	417	98620355	5.61	4.2727	4.03966	0	P53_nolc_peak_900
15	98874857	98875150	294	98874994	9.06	9.43102	6.52221	4.04278	P53_nolc_peak_901
15	99613134	99613632	499	99613214	3.45	2.71475	2.94086	0	P53_nolc_peak_902
15	101754161	101754377	217	101754283	6.04	5.67202	4.50959	0.925403	P53_nolc_peak_903
15	101759990	101760180	191	101760073	6.9	4.25964	4.08385	0	P53_nolc_peak_904
16	592592	592823	232	592695	6.9	3.9103	3.82509	0	P53_nolc_peak_905
16	683213	683648	436	683533	6.04	2.34354	2.34649	0	P53_nolc_peak_906
16	1628843	1629029	187	1628959	4.75	3.71098	3.79592	0	P53_nolc_peak_907
16	1772929	1773308	380	1773017	4.75	2.45281	2.88549	0	P53_nolc_peak_908
16	1961535	1961761	227	1961650	6.9	3.52746	3.53695	0	P53_nolc_peak_909
16	1961960	1962726	767	1962291	6.9	3.95712	3.86003	0	P53_nolc_peak_910a
16	1961960	1962726	767	1962588	6.47	4.07966	3.73543	0	P53_nolc_peak_910b
16	1963578	1964182	605	1963806	6.04	4.54488	3.82268	0.0808944	P53_nolc_peak_911
16	1964653	1964839	187	1964782	6.04	3.37645	3.04871	0	P53_nolc_peak_912
16	2155224	2155410	187	2155361	7.77	4.63586	4.13055	0.14202	P53_nolc_peak_913
16	2663829	2664047	219	2663866	4.31	3.71098	3.5109	0	P53_nolc_peak_914
16	2682332	2682543	212	2682431	6.47	5.67202	4.78594	0.925403	P53_nolc_peak_915
16	2770581	2770865	285	2770720	4.31	3.536	3.40417	0	P53_nolc_peak_916
16	3150516	3150880	365	3150763	6.9	4.07966	3.95112	0	P53_nolc_peak_917
16	3152734	3152935	202	3152839	6.9	4.07966	3.95112	0	P53_nolc_peak_918
16	5082464	5082698	235	5082575	8.2	5.94877	4.59821	1.05594	P53_nolc_peak_919
16	11562558	11562766	209	11562650	11.65	7.17827	5.06712	2.07179	P53_nolc_peak_920
16	13643304	13643490	187	13643402	3.45	2.71475	2.94086	0	P53_nolc_peak_921
16	14913447	14913674	228	14913557	6.9	2.34354	2.63408	0	P53_nolc_peak_922
16	20865810	20866074	265	20865952	6.04	5.86766	4.62029	1.05432	P53_nolc_peak_923
16	22195668	22195939	272	22195859	4.75	2.32117	2.78101	0	P53_nolc_peak_924
16	22297078	22297272	195	22297194	8.2	5.91444	4.57579	1.05432	P53_nolc_peak_925
16	24539233	24539815	583	24539236	3.88	2.34139	2.95105	0	P53_nolc_peak_926
16	25553802	25554108	307	25553942	6.47	4.54488	4.05694	0.0808944	P53_nolc_peak_927
16	29807951	29808221	271	29807994	5.18	2.66758	2.69689	0	P53_nolc_peak_928
16	29810018	29810247	230	29810087	6.04	2.75125	2.62373	0	P53_nolc_peak_929
16	29811267	29811625	359	29811514	6.9	3.48871	3.50759	0	P53_nolc_peak_930
16	30065472	30065714	243	30065524	6.04	2.75125	2.62373	0	P53_nolc_peak_931
16	30355576	30355843	268	30355792	4.75	2.38556	2.83229	0	P53_nolc_peak_932
16	31180074	31180299	226	31180123	4.31	2.93089	3.00781	0	P53_nolc_peak_933
16	37109476	37109662	187	37109566	4.75	3.71098	3.79592	0	P53_nolc_peak_934
16	53378149	53378479	331	53378269	6.9	5.16001	4.72283	0.492089	P53_nolc_peak_935
16	61323400	61323658	259	61323541	6.9	5.92283	5.22102	1.05432	P53_nolc_peak_936
16	67872903	67873138	236	67873060	6.04	4.86783	4.02715	0.251826	P53_nolc_peak_937
16	69330396	69330582	187	69330485	6.9	4.25964	4.08385	0	P53_nolc_peak_938
16	71426393	71426585	193	71426528	5.18	4.78414	4.08094	0.189606	P53_nolc_peak_939
16	85152709	85152970	262	85152845	6.9	4.15441	4.00641	0	P53_nolc_peak_940
16	86502406	86502650	245	86502538	7.77	5.67201	4.85839	0.925403	P53_nolc_peak_941
16	88805413	88805683	271	88805556	4.31	2.38556	2.61962	0	P53_nolc_peak_942
16	89563884	89564128	245	89564037	4.31	2.63497	2.80033	0	P53_nolc_peak_943
16	89995113	89995299	187	89995197	3.45	2.5268	2.8177	0	P53_nolc_peak_944
17	134756	134948	193	134873	5.61	3.22608	3.30404	0	P53_nolc_peak_945
17	351489	351675	187	351651	4.31	3.71098	3.5109	0	P53_nolc_peak_946
17	4854409	4854671	263	4854532	15.53	12.9785	7.78985	7.25314	P53_nolc_peak_947
17	4967761	4968024	264	4967920	5.18	3.42327	3.22324	0	P53_nolc_peak_948
17	7221543	7221762	220	7221594	3.88	2.3854	2.98479	0	P53_nolc_peak_949
17	7242986	7243236	251	7243122	5.18	3.16325	3.04495	0	P53_nolc_peak_950
17	7484464	7484819	356	7484511	4.31	2.32117	2.5722	0	P53_nolc_peak_951
17	7836742	7837027	286	7836830	4.31	2.43654	2.65695	0	P53_nolc_peak_952
17	8119028	8119214	187	8119103	6.9	4.07966	3.95112	0	P53_nolc_peak_953
17	8120203	8120460	258	8120335	7.77	5.26107	4.57393	0.582292	P53_nolc_peak_954
17	8120630	8121019	390	8120879	6.04	4.25964	3.63797	0	P53_nolc_peak_955
17	8186784	8187048	265	8186911	5.61	4.20404	3.994	0	P53_nolc_peak_956
17	8187482	8187852	371	8187621	9.06	6.95302	5.0296	1.92273	P53_nolc_peak_957
17	8222173	8222403	231	8222290	7.33	6.06572	4.87176	1.16337	P53_nolc_peak_958
17	8222815	8223050	236	8222906	5.18	4.13751	3.69154	0	P53_nolc_peak_959
17	8226272	8226728	457	8226344	5.18	3.22608	3.08834	0	P53_nolc_peak_960a
17	8226272	8226728	457	8226601	6.9	5.67202	5.0623	0.925403	P53_nolc_peak_960b
17	8226939	8227223	285	8227046	8.2	8.36482	6.07609	3.09392	P53_nolc_peak_961
17	10205718	10205940	223	10205842	6.04	4.07966	3.51973	0	P53_nolc_peak_962
17	15963926	15964112	187	15964092	4.31	2.55954	2.7462	0	P53_nolc_peak_963
17	19063541	19063996	456	19063840	14.67	16.6667	10.3514	10.6846	P53_nolc_peak_964
17	19112127	19112409	283	19112306	9.49	6.50084	4.94373	1.55104	P53_nolc_peak_965
17	19187986	19188245	260	19188122	13.37	15.2003	9.49633	9.31577	P53_nolc_peak_966
17	21429426	21429612	187	21429490	3.45	2.71475	2.94086	0	P53_nolc_peak_967
17	21818015	21818294	280	21818165	9.92	6.9145	5.43436	1.91049	P53_nolc_peak_968
17	22135109	22135369	261	22135185	3.02	2.34139	2.42958	0	P53_nolc_peak_969
17	22139657	22139854	198	22139748	3.88	2.71475	3.22588	0	P53_nolc_peak_970
17	22140057	22140336	280	22140211	3.02	2.71475	2.65584	0	P53_nolc_peak_971
17	22145183	22145397	215	22145253	3.88	2.57739	3.12781	0	P53_nolc_peak_972
17	22156220	22156551	332	22156422	5.61	4.78414	4.36596	0.189606	P53_nolc_peak_973
17	27293978	27294214	237	27294066	5.61	3.72256	3.66281	0	P53_nolc_peak_974
17	28407632	28407880	249	28407747	6.04	5.40341	4.35314	0.70699	P53_nolc_peak_975
17	29639415	29639617	203	29639506	6.9	4.60618	4.33522	0.117523	P53_nolc_peak_976
17	30040746	30040958	213	30040836	5.18	3.22608	3.08834	0	P53_nolc_peak_977
17	31274325	31274511	187	31274418	5.18	3.89043	3.53357	0	P53_nolc_peak_978
17	39046714	39047050	337	39046882	18.12	20.8526	11.5554	14.5563	P53_nolc_peak_979
17	42577493	42578020	528	42577883	4.31	3.34904	3.28607	0	P53_nolc_peak_980
17	42998267	42998635	369	42998489	5.18	3.42327	3.22324	0	P53_nolc_peak_981
17	43251635	43251882	248	43251760	10.78	7.99793	5.89238	2.80268	P53_nolc_peak_982
17	43483708	43483947	240	43483894	5.18	3.16325	3.04495	0	P53_nolc_peak_983
17	48604941	48605166	226	48605042	6.04	5.57938	4.4562	0.862216	P53_nolc_peak_984
17	48612024	48612331	308	48612177	4.75	3.4092	3.5944	0	P53_nolc_peak_985
17	48619820	48620222	403	48619932	5.61	4.78414	4.36596	0.189606	P53_nolc_peak_986
17	49708100	49708313	214	49708252	3.02	2.68449	2.63831	0	P53_nolc_peak_987
17	49980900	49981094	195	49981009	7.77	5.26107	4.57393	0.582292	P53_nolc_peak_988
17	50371648	50371897	250	50371803	6.04	4.07966	3.51973	0	P53_nolc_peak_989
17	50954292	50954565	274	50954430	10.35	8.12072	5.75612	2.90218	P53_nolc_peak_990
17	57523959	57524304	346	57524134	12.08	11.1072	7.10233	5.52789	P53_nolc_peak_991
17	58631626	58631969	344	58631717	6.04	3.26976	2.97639	0	P53_nolc_peak_992
17	58659150	58659456	307	58659286	6.47	3.2015	3.10962	0	P53_nolc_peak_993
17	59154905	59155091	187	59155064	3.02	2.478	2.51485	0	P53_nolc_peak_994
17	62670354	62670578	225	62670472	7.77	4.7394	4.20466	0.189606	P53_nolc_peak_995
17	62724844	62725030	187	62724943	6.04	4.05368	3.50257	0	P53_nolc_peak_996
17	64505103	64505606	504	64505490	3.88	2.71475	3.22588	0	P53_nolc_peak_997
17	64506088	64506444	357	64506342	5.61	3.22608	3.30404	0	P53_nolc_peak_998
17	64506635	64506850	216	64506726	6.47	5.67202	4.78594	0.925403	P53_nolc_peak_999
17	65058659	65058849	191	65058754	6.47	3.60706	3.40079	0	P53_nolc_peak_1000
17	69430416	69430838	423	69430632	6.04	5.57938	4.4562	0.862216	P53_nolc_peak_1001
17	69607242	69607554	313	69607366	8.63	7.47161	5.81917	2.33993	P53_nolc_peak_1002
17	70191288	70191529	242	70191351	3.45	2.71475	2.94086	0	P53_nolc_peak_1003
17	70678513	70678754	242	70678666	3.45	2.71475	2.94086	0	P53_nolc_peak_1004
17	73224780	73225063	284	73224921	14.24	11.8224	7.17996	6.19872	P53_nolc_peak_1005
17	75033809	75034042	234	75033897	4.75	2.59681	2.99812	0	P53_nolc_peak_1006
17	75034880	75035320	441	75035036	7.77	5.19801	4.52973	0.524824	P53_nolc_peak_1007
17	79319540	79319726	187	79319622	8.63	5.54603	4.53714	0.83354	P53_nolc_peak_1008
17	80109670	80109870	201	80109770	8.63	5.72482	4.66035	0.976188	P53_nolc_peak_1009
17	80823141	80823327	187	80823255	4.31	3.71098	3.5109	0	P53_nolc_peak_1010
17	81867457	81867691	235	81867573	5.18	3.22608	3.08834	0	P53_nolc_peak_1011
17	82332278	82332506	229	82332415	9.06	4.33257	3.35307	0	P53_nolc_peak_1012
17	82360567	82360965	399	82360655	6.47	2.34354	2.49029	0	P53_nolc_peak_1013
17	82494682	82494895	214	82494803	9.49	6.98836	5.26874	1.94946	P53_nolc_peak_1014
17	83069532	83069892	361	83069709	26.75	20.7457	9.24874	14.4739	P53_nolc_peak_1015
17	83237881	83238121	241	83237991	9.92	6.95302	5.46099	1.92273	P53_nolc_peak_1016
18	5629676	5629862	187	5629766	4.75	3.71098	3.79592	0	P53_nolc_peak_1017
18	8685365	8685604	240	8685507	5.18	4.2727	3.77594	0	P53_nolc_peak_1018
18	12698359	12698624	266	12698492	4.31	3.71098	3.5109	0	P53_nolc_peak_1019
18	15181123	15181309	187	15181159	3.45	2.71475	2.94086	0	P53_nolc_peak_1020
18	25070128	25070314	187	25070290	3.45	2.71475	2.94086	0	P53_nolc_peak_1021
18	25533301	25533542	242	25533436	6.9	5.86766	5.18656	1.05432	P53_nolc_peak_1022
18	26575295	26575481	187	26575387	3.02	2.3854	2.45735	0	P53_nolc_peak_1023
18	27547072	27547304	233	27547184	3.02	2.71475	2.65584	0	P53_nolc_peak_1024
18	30120460	30120646	187	30120513	3.45	2.71475	2.94086	0	P53_nolc_peak_1025
18	30308371	30308557	187	30308442	3.88	2.71475	3.22588	0	P53_nolc_peak_1026
18	30376565	30376751	187	30376611	4.31	2.43654	2.65695	0	P53_nolc_peak_1027
18	30544179	30544387	209	30544247	3.45	2.71475	2.94086	0	P53_nolc_peak_1028
18	30726751	30727051	301	30726795	3.02	2.43091	2.48577	0	P53_nolc_peak_1029
18	31133273	31133500	228	31133398	3.02	2.71475	2.65584	0	P53_nolc_peak_1030
18	31499592	31499806	215	31499760	3.45	2.478	2.78474	0	P53_nolc_peak_1031
18	32308593	32308871	279	32308733	8.2	5.54603	4.33384	0.83354	P53_nolc_peak_1032
18	32788327	32788532	206	32788365	3.88	2.3854	2.98479	0	P53_nolc_peak_1033
18	33113186	33113372	187	33113207	3.45	2.71475	2.94086	0	P53_nolc_peak_1034
18	33129315	33129617	303	33129462	3.45	2.478	2.78474	0	P53_nolc_peak_1035
18	33369811	33370039	229	33369927	4.31	3.536	3.40417	0	P53_nolc_peak_1036
18	33560755	33561001	247	33560884	13.37	11.1855	7.08558	5.60131	P53_nolc_peak_1037
18	33666935	33667245	311	33667124	3.45	2.71475	2.94086	0	P53_nolc_peak_1038
18	33903681	33903867	187	33903799	4.75	3.71098	3.79592	0	P53_nolc_peak_1039
18	34046349	34046535	187	34046448	4.31	3.71098	3.5109	0	P53_nolc_peak_1040
18	34053137	34053405	269	34053250	3.88	2.71475	3.22588	0	P53_nolc_peak_1041
18	34082414	34082600	187	34082504	3.45	2.71475	2.94086	0	P53_nolc_peak_1042
18	34202006	34202224	219	34202111	3.02	2.71475	2.65584	0	P53_nolc_peak_1043
18	34275276	34275462	187	34275358	3.02	2.71475	2.65584	0	P53_nolc_peak_1044
18	34284711	34284897	187	34284799	3.45	2.57739	2.85146	0	P53_nolc_peak_1045
18	34301463	34301737	275	34301595	3.88	2.57739	3.12781	0	P53_nolc_peak_1046
18	34393708	34393894	187	34393791	3.45	2.71475	2.94086	0	P53_nolc_peak_1047
18	35583245	35583450	206	35583337	5.61	3.22608	3.30404	0	P53_nolc_peak_1048
18	35972510	35972748	239	35972599	9.06	5.90447	4.35652	1.05432	P53_nolc_peak_1049
18	36329713	36329915	203	36329797	3.45	2.478	2.78474	0	P53_nolc_peak_1050
18	36672357	36672641	285	36672520	10.35	10.5855	7.27314	5.0544	P53_nolc_peak_1051
18	37040170	37040356	187	37040288	3.45	2.3854	2.72107	0	P53_nolc_peak_1052
18	37088137	37088445	309	37088353	3.02	2.71475	2.65584	0	P53_nolc_peak_1053
18	38162197	38162500	304	38162371	3.45	2.71475	2.94086	0	P53_nolc_peak_1054
18	38176905	38177099	195	38176975	3.02	2.71475	2.65584	0	P53_nolc_peak_1055
18	38328092	38328315	224	38328170	3.02	2.71475	2.65584	0	P53_nolc_peak_1056
18	38387273	38387576	304	38387376	3.02	2.71475	2.65584	0	P53_nolc_peak_1057
18	38591227	38591413	187	38591308	3.02	2.71475	2.65584	0	P53_nolc_peak_1058
18	38628645	38628831	187	38628738	3.88	2.71475	3.22588	0	P53_nolc_peak_1059
18	38747269	38747455	187	38747359	4.31	3.71098	3.5109	0	P53_nolc_peak_1060
18	38847394	38847716	323	38847521	4.31	3.71098	3.5109	0	P53_nolc_peak_1061
18	39001624	39001810	187	39001679	3.02	2.478	2.51485	0	P53_nolc_peak_1062
18	39078505	39078828	324	39078714	3.02	2.71475	2.65584	0	P53_nolc_peak_1063
18	39082228	39082537	310	39082320	3.88	2.71475	3.22588	0	P53_nolc_peak_1064
18	39209027	39209363	337	39209096	3.45	2.5268	2.8177	0	P53_nolc_peak_1065
18	39247413	39247652	240	39247471	4.75	2.43654	2.87265	0	P53_nolc_peak_1066
18	39779793	39780073	281	39779901	3.02	2.57739	2.5751	0	P53_nolc_peak_1067
18	40215952	40216307	356	40216136	17.26	18.97	10.79	12.8221	P53_nolc_peak_1068
18	40242248	40242505	258	40242351	3.45	2.71475	2.94086	0	P53_nolc_peak_1069
18	40435535	40435796	262	40435586	3.02	2.71475	2.65584	0	P53_nolc_peak_1070
18	40690128	40690429	302	40690174	3.45	2.71475	2.94086	0	P53_nolc_peak_1071
18	59899744	59899930	187	59899836	6.9	3.77533	3.72396	0	P53_nolc_peak_1072
19	879180	879491	312	879348	10.78	7.15077	5.31923	2.04745	P53_nolc_peak_1073
19	879670	879875	206	879781	8.63	4.56586	3.8573	0.0864371	P53_nolc_peak_1074
19	1383357	1383831	475	1383485	8.2	4.56586	3.68446	0.0864371	P53_nolc_peak_1075
19	3984948	3985142	195	3985059	3.45	2.5268	2.8177	0	P53_nolc_peak_1076
19	3985375	3985595	221	3985500	5.18	4.13751	3.69154	0	P53_nolc_peak_1077
19	4723657	4724136	480	4723796	5.18	3.08382	2.98983	0	P53_nolc_peak_1078a
19	4723657	4724136	480	4724048	6.04	3.77533	3.31737	0	P53_nolc_peak_1078b
19	5690210	5690557	348	5690423	6.9	4.05368	3.93186	0	P53_nolc_peak_1079
19	6577530	6577716	187	6577616	5.61	3.42327	3.44835	0	P53_nolc_peak_1080
19	12526798	12527010	213	12526882	3.02	2.5268	2.54462	0	P53_nolc_peak_1081
19	12551719	12551908	190	12551797	5.61	3.6178	3.58842	0	P53_nolc_peak_1082
19	12610697	12610883	187	12610789	6.04	4.07966	3.51973	0	P53_nolc_peak_1083
19	13039477	13039699	223	13039569	4.75	3.29088	3.51222	0	P53_nolc_peak_1084
19	13153076	13153277	202	13153177	6.47	3.9103	3.61627	0	P53_nolc_peak_1085
19	15646496	15646928	433	15646738	9.06	9.65634	6.64613	4.20284	P53_nolc_peak_1086
19	15892777	15893146	370	15892986	6.9	5.67202	5.0623	0.925403	P53_nolc_peak_1087
19	18224519	18224831	313	18224659	17.26	8.44714	4.5639	3.16471	P53_nolc_peak_1088
19	18364795	18365075	281	18364950	9.49	7.06376	5.31869	2.01291	P53_nolc_peak_1089
19	18373832	18374019	188	18373925	7.77	4.25792	3.85853	0	P53_nolc_peak_1090
19	18386096	18386323	228	18386199	7.33	4.90254	4.10828	0.285447	P53_nolc_peak_1091
19	19776308	19776879	572	19776572	6.04	5.86766	4.62029	1.05432	P53_nolc_peak_1092
19	21767303	21767668	366	21767408	4.31	3.47147	3.36387	0	P53_nolc_peak_1093
19	27793567	27793938	372	27793619	3.02	2.71475	2.65584	0	P53_nolc_peak_1094
19	34184621	34184812	192	34184741	3.88	2.5268	3.09079	0	P53_nolc_peak_1095
19	34677041	34677547	507	34677371	4.31	3.71098	3.5109	0	P53_nolc_peak_1096
19	34773125	34773448	324	34773169	3.02	2.71475	2.65584	0	P53_nolc_peak_1097
19	36797574	36797786	213	36797683	5.18	4.49276	3.91004	0.0325609	P53_nolc_peak_1098
19	37218164	37218357	194	37218283	6.04	5.86766	4.62029	1.05432	P53_nolc_peak_1099
19	37303169	37303355	187	37303258	5.18	4.78414	4.08094	0.189606	P53_nolc_peak_1100
19	40719035	40719248	214	40719157	7.33	4.63586	3.92726	0.14202	P53_nolc_peak_1101
19	41920101	41920517	417	41920396	10.35	7.49623	5.35032	2.36169	P53_nolc_peak_1102
19	43073543	43073729	187	43073630	3.45	2.71475	2.94086	0	P53_nolc_peak_1103
19	43129372	43129619	248	43129472	6.04	5.86766	4.62029	1.05432	P53_nolc_peak_1104
19	43148354	43148696	343	43148433	6.9	4.07966	3.95112	0	P53_nolc_peak_1105
19	43191500	43191760	261	43191565	3.02	2.57739	2.5751	0	P53_nolc_peak_1106
19	43192385	43193034	650	43192663	4.75	3.67246	3.77087	0	P53_nolc_peak_1107
19	44094263	44094605	343	44094511	3.02	2.68449	2.63831	0	P53_nolc_peak_1108
19	46133446	46133750	305	46133593	13.37	11.7273	7.42796	6.11305	P53_nolc_peak_1109
19	47109848	47110080	233	47109947	6.9	4.05368	3.93186	0	P53_nolc_peak_1110
19	47232436	47232623	188	47232528	8.2	3.90196	3.24663	0	P53_nolc_peak_1111
19	50896588	50896853	266	50896721	16.82	12.1894	7.14112	6.53601	P53_nolc_peak_1112
19	51397610	51397831	222	51397713	5.18	3.37746	3.19209	0	P53_nolc_peak_1113
19	55385942	55386128	187	55386036	5.18	4.78414	4.08094	0.189606	P53_nolc_peak_1114
19	57280209	57280407	199	57280331	3.88	2.71475	3.22588	0	P53_nolc_peak_1115
19	58475866	58476217	352	58475948	4.75	3.34904	3.55284	0	P53_nolc_peak_1116
19	58519992	58520194	203	58520178	4.75	2.43654	2.87265	0	P53_nolc_peak_1117
19	58596891	58597144	254	58597006	6.47	5.92283	4.936	1.05432	P53_nolc_peak_1118
2	1488982	1489406	425	1489161	18.12	9.25272	4.7796	3.89902	P53_nolc_peak_1119
2	1656455	1656982	528	1656615	7.33	7.05505	5.4697	2.00839	P53_nolc_peak_1120
2	1705073	1705298	226	1705180	5.61	4.78414	4.36596	0.189606	P53_nolc_peak_1121
2	3575173	3575364	192	3575257	3.88	2.43091	3.0193	0	P53_nolc_peak_1122
2	8681955	8682265	311	8682063	6.47	4.25964	3.86091	0	P53_nolc_peak_1123
2	8683047	8683233	187	8683054	3.45	2.68449	2.92145	0	P53_nolc_peak_1124
2	9631183	9631369	187	9631187	4.75	2.97787	3.28678	0	P53_nolc_peak_1125
2	19228803	19229106	304	19228932	5.18	4.78414	4.08094	0.189606	P53_nolc_peak_1126
2	19901731	19902242	512	19901818	4.75	3.67246	3.77087	0	P53_nolc_peak_1127
2	19960843	19961083	241	19960934	6.04	5.00971	4.1152	0.36153	P53_nolc_peak_1128
2	20448750	20448968	219	20448837	3.88	2.57739	3.12781	0	P53_nolc_peak_1129
2	20632514	20632784	271	20632631	4.75	3.71098	3.79592	0	P53_nolc_peak_1130
2	23493016	23493260	245	23493158	6.47	4.07966	3.73543	0	P53_nolc_peak_1131
2	24084313	24084513	201	24084410	9.06	2.95763	2.5148	0	P53_nolc_peak_1132
2	27050710	27050901	192	27050799	6.9	4.54488	4.2912	0.0808944	P53_nolc_peak_1133
2	27051134	27051383	250	27051261	6.04	4.79979	3.98453	0.199793	P53_nolc_peak_1134
2	29966297	29966556	260	29966460	5.18	3.22608	3.08834	0	P53_nolc_peak_1135
2	33014418	33014604	187	33014510	4.31	3.71098	3.5109	0	P53_nolc_peak_1136
2	37786883	37787221	339	37787068	9.49	9.29114	6.72043	3.92368	P53_nolc_peak_1137
2	38026837	38027164	328	38027002	5.18	4.78414	4.08094	0.189606	P53_nolc_peak_1138
2	38751281	38751572	292	38751434	6.9	4.25964	4.08385	0	P53_nolc_peak_1139
2	39405353	39405590	238	39405494	9.92	6.95302	5.46099	1.92273	P53_nolc_peak_1140
2	40666398	40666666	269	40666514	3.02	2.71475	2.65584	0	P53_nolc_peak_1141
2	46172461	46172647	187	46172514	3.02	2.71475	2.65584	0	P53_nolc_peak_1142
2	46749152	46749362	211	46749265	6.04	5.31969	4.30338	0.632932	P53_nolc_peak_1143
2	47176420	47176961	542	47176511	5.18	4.78414	4.08094	0.189606	P53_nolc_peak_1144
2	55012766	55013207	442	55012981	6.9	5.92283	5.22102	1.05432	P53_nolc_peak_1145
2	55617443	55617796	354	55617699	4.31	3.536	3.40417	0	P53_nolc_peak_1146
2	55943531	55943814	284	55943686	4.31	3.71098	3.5109	0	P53_nolc_peak_1147
2	58241226	58241468	243	58241317	3.88	2.71475	3.22588	0	P53_nolc_peak_1148
2	61538198	61538515	318	61538260	3.02	2.43091	2.48577	0	P53_nolc_peak_1149
2	61959964	61960214	251	61960101	6.04	4.05368	3.50257	0	P53_nolc_peak_1150
2	64730624	64730931	308	64730776	9.49	9.65634	6.93115	4.20284	P53_nolc_peak_1151
2	66389575	66390050	476	66389909	4.31	3.29088	3.2485	0	P53_nolc_peak_1152
2	66569337	66569535	199	66569425	4.31	3.71098	3.5109	0	P53_nolc_peak_1153
2	68744504	68744850	347	68744672	12.51	13.7636	8.92629	7.959	P53_nolc_peak_1154
2	69307312	69307585	274	69307416	3.45	2.71475	2.94086	0	P53_nolc_peak_1155
2	70190671	70190857	187	70190799	6.04	3.5669	3.17737	0	P53_nolc_peak_1156
2	70248855	70249048	194	70248962	7.33	4.7927	4.0339	0.195662	P53_nolc_peak_1157
2	71130401	71130587	187	71130521	4.31	2.48758	2.69413	0	P53_nolc_peak_1158
2	73234109	73234525	417	73234418	5.18	4.57131	3.95688	0.0864371	P53_nolc_peak_1159
2	73737290	73737480	191	73737439	3.02	2.71475	2.65584	0	P53_nolc_peak_1160
2	74529711	74529898	188	74529798	5.61	3.22608	3.30404	0	P53_nolc_peak_1161
2	86440714	86441224	511	86441185	5.18	4.57131	3.95688	0.0864371	P53_nolc_peak_1162
2	88191636	88191827	192	88191734	6.04	5.57938	4.4562	0.862216	P53_nolc_peak_1163
2	94213112	94213298	187	94213204	5.61	3.89043	3.78036	0	P53_nolc_peak_1164
2	97268074	97268385	312	97268266	3.45	2.71475	2.94086	0	P53_nolc_peak_1165
2	99977915	99978250	336	99978066	6.04	5.86766	4.62029	1.05432	P53_nolc_peak_1166
2	101820569	101820755	187	101820667	3.45	2.71475	2.94086	0	P53_nolc_peak_1167
2	102983922	102984108	187	102984013	5.18	4.78414	4.08094	0.189606	P53_nolc_peak_1168
2	104703565	104703871	307	104703689	4.75	3.71098	3.79592	0	P53_nolc_peak_1169
2	108404860	108405094	235	108404948	5.18	3.89043	3.53357	0	P53_nolc_peak_1170
2	112031983	112032231	249	112032109	5.18	4.78414	4.08094	0.189606	P53_nolc_peak_1171
2	112814397	112814733	337	112814497	5.61	4.41691	4.13418	0	P53_nolc_peak_1172
2	113614063	113614299	237	113614175	7.77	7.11857	5.79107	2.01982	P53_nolc_peak_1173
2	119218393	119218658	266	119218498	5.18	4.78414	4.08094	0.189606	P53_nolc_peak_1174
2	119240580	119240971	392	119240695	7.77	6.82969	5.61501	1.83626	P53_nolc_peak_1175
2	120737977	120738163	187	120738064	3.45	2.34139	2.69031	0	P53_nolc_peak_1176
2	128305374	128305619	246	128305553	4.31	3.536	3.40417	0	P53_nolc_peak_1177
2	130337091	130337277	187	130337206	3.45	2.71475	2.94086	0	P53_nolc_peak_1178
2	134131746	134131995	250	134131876	6.47	5.92283	4.936	1.05432	P53_nolc_peak_1179
2	139138995	139139181	187	139139133	3.02	2.71475	2.65584	0	P53_nolc_peak_1180
2	139864996	139865206	211	139865087	3.02	2.71475	2.65584	0	P53_nolc_peak_1181
2	145194934	145195120	187	145195086	3.88	2.71475	3.22588	0	P53_nolc_peak_1182
2	152175824	152176328	505	152176054	3.02	2.57739	2.5751	0	P53_nolc_peak_1183
2	153059750	153059946	197	153059848	4.31	3.71098	3.5109	0	P53_nolc_peak_1184
2	156400719	156401246	528	156400800	5.18	4.57131	3.95688	0.0864371	P53_nolc_peak_1185a
2	156400719	156401246	528	156401135	5.18	4.78414	4.08094	0.189606	P53_nolc_peak_1185b
2	160352607	160352794	188	160352715	6.04	4.07966	3.51973	0	P53_nolc_peak_1186
2	160695784	160695972	189	160695890	5.18	4.78414	4.08094	0.189606	P53_nolc_peak_1187
2	164839992	164840327	336	164840160	5.18	3.22608	3.08834	0	P53_nolc_peak_1188
2	166410327	166410541	215	166410446	5.61	4.78414	4.36596	0.189606	P53_nolc_peak_1189
2	168452829	168453097	269	168452964	12.94	10.1966	6.97086	4.69305	P53_nolc_peak_1190
2	169954065	169954251	187	169954223	6.9	4.07966	3.95112	0	P53_nolc_peak_1191
2	172101549	172101832	284	172101622	3.02	2.43091	2.48577	0	P53_nolc_peak_1192
2	177170230	177170514	285	177170382	6.9	5.67202	5.0623	0.925403	P53_nolc_peak_1193
2	185568037	185568290	254	185568168	6.04	5.92283	4.65098	1.05432	P53_nolc_peak_1194
2	189288107	189288314	208	189288198	6.9	4.07966	3.95112	0	P53_nolc_peak_1195
2	197202020	197202206	187	197202112	5.18	4.41691	3.86429	0	P53_nolc_peak_1196
2	197498851	197499037	187	197498932	4.31	3.23459	3.21179	0	P53_nolc_peak_1197
2	200300752	200300938	187	200300846	5.18	4.78414	4.08094	0.189606	P53_nolc_peak_1198
2	204764278	204764488	211	204764394	3.45	2.71475	2.94086	0	P53_nolc_peak_1199
2	205678819	205679044	226	205678950	5.18	4.78414	4.08094	0.189606	P53_nolc_peak_1200
2	206477334	206477570	237	206477452	4.31	3.71098	3.5109	0	P53_nolc_peak_1201
2	207337824	207338091	268	207337892	3.45	2.57739	2.85146	0	P53_nolc_peak_1202
2	210928698	210928906	209	210928806	3.88	2.71475	3.22588	0	P53_nolc_peak_1203
2	211880405	211880679	275	211880527	5.61	4.78414	4.36596	0.189606	P53_nolc_peak_1204
2	217838571	217838915	345	217838858	3.02	2.71475	2.65584	0	P53_nolc_peak_1205
2	219286382	219286677	296	219286589	6.04	4.07966	3.51973	0	P53_nolc_peak_1206
2	223957280	223957688	409	223957361	5.18	4.78414	4.08094	0.189606	P53_nolc_peak_1207
2	225276661	225276874	214	225276812	4.31	3.71098	3.5109	0	P53_nolc_peak_1208
2	226650072	226650258	187	226650160	3.88	2.71475	3.22588	0	P53_nolc_peak_1209
2	229843435	229843736	302	229843594	3.88	2.71475	3.22588	0	P53_nolc_peak_1210
2	231708399	231708888	490	231708467	4.75	2.97787	3.28678	0	P53_nolc_peak_1211
2	231713682	231714124	443	231714018	5.61	4.78414	4.36596	0.189606	P53_nolc_peak_1212
2	238452866	238453462	597	238453052	10.78	10.9889	7.78621	5.41454	P53_nolc_peak_1213a
2	238452866	238453462	597	238453290	7.77	7.11857	5.79107	2.01982	P53_nolc_peak_1213b
2	239347975	239348247	273	239348144	6.9	4.79979	4.47289	0.199793	P53_nolc_peak_1214
2	239706859	239707045	187	239706968	6.04	4.07966	3.51973	0	P53_nolc_peak_1215
2	241895834	241896034	201	241895922	7.77	4.98931	4.38251	0.344917	P53_nolc_peak_1216
20	5120066	5120334	269	5120189	6.47	5.92283	4.936	1.05432	P53_nolc_peak_1217
20	20603380	20603665	286	20603541	8.2	8.36482	6.07609	3.09392	P53_nolc_peak_1218
20	21323779	21323965	187	21323867	3.88	2.71475	3.22588	0	P53_nolc_peak_1219
20	28560798	28561215	418	28560927	5.61	4.57131	4.23323	0.0864371	P53_nolc_peak_1220
20	28563472	28563659	188	28563630	4.31	3.71098	3.5109	0	P53_nolc_peak_1221
20	28565524	28565855	332	28565693	6.47	4.07966	3.73543	0	P53_nolc_peak_1222
20	28610126	28610610	485	28610211	5.18	4.78414	4.08094	0.189606	P53_nolc_peak_1223
20	28636734	28637013	280	28636904	4.75	3.71098	3.79592	0	P53_nolc_peak_1224
20	29055696	29056094	399	29056040	3.88	2.71475	3.22588	0	P53_nolc_peak_1225
20	29065914	29066114	201	29066019	4.75	3.71098	3.79592	0	P53_nolc_peak_1226
20	29084627	29085075	449	29084819	6.04	4.07966	3.51973	0	P53_nolc_peak_1227
20	29088485	29088671	187	29088648	3.45	2.71475	2.94086	0	P53_nolc_peak_1228
20	29116770	29116956	187	29116823	3.45	2.478	2.78474	0	P53_nolc_peak_1229
20	29120639	29120895	257	29120728	5.18	4.2727	3.77594	0	P53_nolc_peak_1230
20	29122604	29123021	418	29122683	3.88	2.57739	3.12781	0	P53_nolc_peak_1231
20	29385592	29385835	244	29385733	4.75	2.43654	2.87265	0	P53_nolc_peak_1232
20	29391113	29391565	453	29391434	4.31	3.71098	3.5109	0	P53_nolc_peak_1233
20	29411020	29411569	550	29411467	6.04	4.07966	3.51973	0	P53_nolc_peak_1234
20	29792501	29792711	211	29792632	5.18	4.34361	3.81961	0	P53_nolc_peak_1235
20	29880478	29880899	422	29880724	5.61	3.22608	3.30404	0	P53_nolc_peak_1236
20	30423244	30423576	333	30423396	5.18	4.78414	4.08094	0.189606	P53_nolc_peak_1237
20	30424500	30424754	255	30424646	6.47	5.92283	4.936	1.05432	P53_nolc_peak_1238
20	30825032	30825255	224	30825107	3.02	2.71475	2.65584	0	P53_nolc_peak_1239
20	30844722	30844908	187	30844859	4.31	3.71098	3.5109	0	P53_nolc_peak_1240
20	30849095	30849281	187	30849175	6.04	5.92283	4.65098	1.05432	P53_nolc_peak_1241
20	31669837	31670048	212	31669949	4.31	3.536	3.40417	0	P53_nolc_peak_1242
20	37394946	37395195	250	37395055	6.04	5.92283	4.65098	1.05432	P53_nolc_peak_1243
20	44999964	45000269	306	45000140	3.88	2.3854	2.98479	0	P53_nolc_peak_1244
20	45339177	45339504	328	45339328	9.49	9.65634	6.93115	4.20284	P53_nolc_peak_1245
20	46169278	46169583	306	46169443	7.77	6.94031	5.68309	1.92273	P53_nolc_peak_1246
20	46901761	46901986	226	46901879	7.33	7.11857	5.50604	2.01982	P53_nolc_peak_1247
20	53867406	53867612	207	53867449	3.02	2.71475	2.65584	0	P53_nolc_peak_1248
20	56392363	56392549	187	56392450	3.02	2.71475	2.65584	0	P53_nolc_peak_1249
20	57263219	57263456	238	57263344	4.75	3.71098	3.79592	0	P53_nolc_peak_1250
20	57580141	57580369	229	57580224	3.02	2.71475	2.65584	0	P53_nolc_peak_1251
20	58651004	58651620	617	58651186	4.31	3.71098	3.5109	0	P53_nolc_peak_1252
20	62149967	62150171	205	62150083	4.75	3.29088	3.51222	0	P53_nolc_peak_1253
20	63185992	63186204	213	63186079	4.75	3.60294	3.72515	0	P53_nolc_peak_1254
20	63693449	63693673	225	63693530	8.63	3.62443	3.20927	0	P53_nolc_peak_1255
20	64088699	64088925	227	64088789	5.18	4.49276	3.91004	0.0325609	P53_nolc_peak_1256
20	64214169	64214419	251	64214274	6.9	5.92283	5.22102	1.05432	P53_nolc_peak_1257
21	5216939	5217188	250	5217176	4.75	3.536	3.68052	0	P53_nolc_peak_1258
21	5221506	5221769	264	5221636	3.02	2.71475	2.65584	0	P53_nolc_peak_1259
21	5225694	5226325	632	5225878	4.31	3.71098	3.5109	0	P53_nolc_peak_1260
21	5228122	5228308	187	5228177	3.02	2.71475	2.65584	0	P53_nolc_peak_1261
21	5228533	5228719	187	5228587	4.31	2.43654	2.65695	0	P53_nolc_peak_1262
21	6371863	6372066	204	6371966	4.75	3.71098	3.79592	0	P53_nolc_peak_1263
21	8208448	8208644	197	8208549	9.06	8.1152	5.75469	2.89994	P53_nolc_peak_1264
21	8213115	8213332	218	8213226	9.06	6.95302	5.0296	1.92273	P53_nolc_peak_1265
21	8219740	8220294	555	8220016	49.18	14.3049	3.58418	8.4719	P53_nolc_peak_1266
21	8230348	8230785	438	8230432	17.26	4.24476	2.60795	0	P53_nolc_peak_1267a
21	8230348	8230785	438	8230698	29.77	6.60034	2.7969	1.64297	P53_nolc_peak_1267b
21	8233104	8233301	198	8233210	31.92	6.69973	2.74357	1.726	P53_nolc_peak_1268
21	8405513	8405759	247	8405605	20.71	10.9285	5.42669	5.37506	P53_nolc_peak_1269
21	8420063	8420553	491	8420189	37.1	11.7703	3.68112	6.15344	P53_nolc_peak_1270a
21	8420063	8420553	491	8420460	47.02	8.46206	2.52745	3.17626	P53_nolc_peak_1270b
21	8757500	8757715	216	8757572	3.88	2.71475	3.22588	0	P53_nolc_peak_1271
21	8764438	8764624	187	8764590	4.31	3.4092	3.32451	0	P53_nolc_peak_1272
21	8989000	8989723	724	8989090	4.75	2.43654	2.87265	0	P53_nolc_peak_1273a
21	8989000	8989723	724	8989418	6.9	5.92283	5.22102	1.05432	P53_nolc_peak_1273b
21	8990105	8990300	196	8990271	6.04	5.67202	4.50959	0.925403	P53_nolc_peak_1274
21	8992696	8993542	847	8993081	5.18	4.41691	3.86429	0	P53_nolc_peak_1275a
21	8992696	8993542	847	8993422	5.61	4.57131	4.23323	0.0864371	P53_nolc_peak_1275b
21	8994110	8994815	706	8994444	7.77	4.98931	4.38251	0.344917	P53_nolc_peak_1276
21	9008589	9008863	275	9008747	5.61	3.3327	3.38234	0	P53_nolc_peak_1277
21	9012108	9012310	203	9012199	5.61	3.66951	3.62523	0	P53_nolc_peak_1278
21	9015640	9015978	339	9015716	3.45	2.57739	2.85146	0	P53_nolc_peak_1279
21	9028528	9029014	487	9028770	4.75	2.43654	2.87265	0	P53_nolc_peak_1280
21	9029265	9029455	191	9029356	4.75	3.71098	3.79592	0	P53_nolc_peak_1281
21	9029654	9030056	403	9029709	3.45	2.71475	2.94086	0	P53_nolc_peak_1282
21	9130951	9131304	354	9131228	4.75	3.71098	3.79592	0	P53_nolc_peak_1283
21	9292112	9292298	187	9292235	5.18	4.78414	4.08094	0.189606	P53_nolc_peak_1284
21	9815758	9815956	199	9815853	5.61	4.78414	4.36596	0.189606	P53_nolc_peak_1285
21	9818918	9819126	209	9818977	4.31	3.71098	3.5109	0	P53_nolc_peak_1286
21	9819398	9819781	384	9819686	5.61	4.78414	4.36596	0.189606	P53_nolc_peak_1287
21	9821452	9821887	436	9821607	15.1	9.31879	5.36622	3.94255	P53_nolc_peak_1288
21	9846760	9847104	345	9846886	4.31	3.71098	3.5109	0	P53_nolc_peak_1289
21	9898816	9899157	342	9898885	3.02	2.71475	2.65584	0	P53_nolc_peak_1290
21	9914274	9914496	223	9914391	4.75	3.71098	3.79592	0	P53_nolc_peak_1291
21	9926507	9926765	259	9926595	4.31	3.71098	3.5109	0	P53_nolc_peak_1292
21	10273958	10274264	307	10274168	4.31	3.29088	3.2485	0	P53_nolc_peak_1293
21	10360773	10360962	190	10360883	9.06	5.90447	4.35652	1.05432	P53_nolc_peak_1294
21	10363509	10363810	302	10363687	6.47	4.86783	4.27395	0.251826	P53_nolc_peak_1295
21	10393632	10393818	187	10393745	7.33	5.13635	4.26557	0.474289	P53_nolc_peak_1296
21	10416880	10417107	228	10416955	6.9	3.10311	3.21412	0	P53_nolc_peak_1297
21	10424358	10424804	447	10424488	6.47	2.62144	2.69075	0	P53_nolc_peak_1298
21	10425888	10426164	277	10426029	7.33	3.81504	3.364	0	P53_nolc_peak_1299
21	10430088	10430488	401	10430386	8.2	4.40394	3.57726	0	P53_nolc_peak_1300
21	10440760	10441133	374	10441107	5.61	3.12312	3.22786	0	P53_nolc_peak_1301
21	10444382	10444694	313	10444446	4.75	2.43654	2.87265	0	P53_nolc_peak_1302
21	10448488	10448742	255	10448703	4.31	2.43654	2.65695	0	P53_nolc_peak_1303
21	10450156	10450913	758	10450525	4.75	2.43654	2.87265	0	P53_nolc_peak_1304
21	10454648	10455183	536	10454754	5.18	4.73731	4.05401	0.189606	P53_nolc_peak_1305a
21	10454648	10455183	536	10455013	6.9	5.67202	5.0623	0.925403	P53_nolc_peak_1305b
21	10455402	10455712	311	10455532	3.88	2.68449	3.20459	0	P53_nolc_peak_1306
21	10456649	10456887	239	10456772	4.31	3.71098	3.5109	0	P53_nolc_peak_1307
21	10457768	10458293	526	10458002	6.04	2.34354	2.34649	0	P53_nolc_peak_1308
21	10458687	10458995	309	10458802	3.88	2.71475	3.22588	0	P53_nolc_peak_1309
21	10460355	10460814	460	10460432	6.04	5.92283	4.65098	1.05432	P53_nolc_peak_1310
21	10462406	10462662	257	10462503	4.31	3.71098	3.5109	0	P53_nolc_peak_1311
21	10463667	10463923	257	10463743	3.02	2.71475	2.65584	0	P53_nolc_peak_1312
21	10464715	10465146	432	10465071	3.88	2.71475	3.22588	0	P53_nolc_peak_1313
21	10466177	10466680	504	10466556	4.31	3.71098	3.5109	0	P53_nolc_peak_1314
21	10466880	10467126	247	10467026	4.31	3.71098	3.5109	0	P53_nolc_peak_1315
21	10467531	10467862	332	10467618	3.02	2.71475	2.65584	0	P53_nolc_peak_1316
21	10470173	10470400	228	10470305	5.18	3.89043	3.53357	0	P53_nolc_peak_1317
21	10473928	10474438	511	10474172	3.88	2.71475	3.22588	0	P53_nolc_peak_1318
21	10475005	10475250	246	10475159	3.45	2.71475	2.94086	0	P53_nolc_peak_1319
21	10478850	10479036	187	10478947	5.18	4.78414	4.08094	0.189606	P53_nolc_peak_1320
21	10607219	10607448	230	10607327	6.04	5.92283	4.65098	1.05432	P53_nolc_peak_1321
21	10629411	10629666	256	10629557	3.88	2.71475	3.22588	0	P53_nolc_peak_1322
21	13923282	13923502	221	13923398	5.61	4.78414	4.36596	0.189606	P53_nolc_peak_1323
21	17089183	17089390	208	17089285	4.75	3.71098	3.79592	0	P53_nolc_peak_1324
21	17223645	17223864	220	17223736	4.31	3.60294	3.44544	0	P53_nolc_peak_1325
21	17454442	17454924	483	17454837	7.33	4.63586	3.92726	0.14202	P53_nolc_peak_1326
21	20592516	20592729	214	20592631	5.18	4.78414	4.08094	0.189606	P53_nolc_peak_1327
21	25734936	25735143	208	25735037	4.31	3.47147	3.36387	0	P53_nolc_peak_1328
21	26124698	26124899	202	26124786	3.88	2.57739	3.12781	0	P53_nolc_peak_1329
21	26843015	26843288	274	26843066	3.02	2.71475	2.65584	0	P53_nolc_peak_1330
21	26844131	26844461	331	26844307	4.31	3.71098	3.5109	0	P53_nolc_peak_1331
21	26845169	26845546	378	26845467	6.47	5.67202	4.78594	0.925403	P53_nolc_peak_1332
21	28992824	28993024	201	28992996	5.61	3.22608	3.30404	0	P53_nolc_peak_1333
21	31667667	31667891	225	31667782	6.47	4.07966	3.73543	0	P53_nolc_peak_1334
21	32771836	32772032	197	32771924	4.75	2.43654	2.87265	0	P53_nolc_peak_1335
21	33367203	33367524	322	33367354	18.12	16.8619	9.17126	10.8687	P53_nolc_peak_1336
21	34675311	34675522	212	34675408	8.2	5.94877	4.59821	1.05594	P53_nolc_peak_1337
21	38903866	38904056	191	38903978	4.75	3.71098	3.79592	0	P53_nolc_peak_1338
21	41006042	41006228	187	41006111	3.45	2.71475	2.94086	0	P53_nolc_peak_1339
21	46688688	46688969	282	46688817	11.22	12.359	8.07123	6.67834	P53_nolc_peak_1340
22	10710341	10710603	263	10710442	3.02	2.71475	2.65584	0	P53_nolc_peak_1341
22	10761613	10761947	335	10761715	3.88	2.5268	3.09079	0	P53_nolc_peak_1342
22	10763216	10763552	337	10763366	4.31	3.29088	3.2485	0	P53_nolc_peak_1343
22	10763788	10763987	200	10763912	4.31	3.29088	3.2485	0	P53_nolc_peak_1344
22	10767399	10767585	187	10767460	5.18	3.89043	3.53357	0	P53_nolc_peak_1345
22	10768037	10768305	269	10768212	3.45	2.43091	2.75253	0	P53_nolc_peak_1346
22	10771378	10771891	514	10771823	6.04	2.34354	2.34649	0	P53_nolc_peak_1347
22	10938202	10938388	187	10938286	3.45	2.71475	2.94086	0	P53_nolc_peak_1348
22	10940013	10940199	187	10940067	3.02	2.71475	2.65584	0	P53_nolc_peak_1349
22	10941867	10942156	290	10942035	4.31	3.71098	3.5109	0	P53_nolc_peak_1350
22	10945354	10945632	279	10945397	3.02	2.71475	2.65584	0	P53_nolc_peak_1351
22	10963085	10963312	228	10963201	4.75	3.60294	3.72515	0	P53_nolc_peak_1352
22	11017861	11018191	331	11017923	3.45	2.57739	2.85146	0	P53_nolc_peak_1353
22	11023044	11023297	254	11023171	5.18	4.20404	3.73326	0	P53_nolc_peak_1354
22	11047382	11047568	187	11047467	3.02	2.43091	2.48577	0	P53_nolc_peak_1355
22	11067580	11067811	232	11067705	4.75	3.71098	3.79592	0	P53_nolc_peak_1356
22	11068071	11068301	231	11068153	3.02	2.71475	2.65584	0	P53_nolc_peak_1357
22	11315934	11316120	187	11316107	3.45	2.43091	2.75253	0	P53_nolc_peak_1358
22	11571723	11572083	361	11571784	5.18	3.22608	3.08834	0	P53_nolc_peak_1359
22	11974212	11974452	241	11974336	6.47	5.92283	4.936	1.05432	P53_nolc_peak_1360
22	12064606	12064855	250	12064805	4.31	3.71098	3.5109	0	P53_nolc_peak_1361
22	12195423	12195686	264	12195528	3.45	2.57739	2.85146	0	P53_nolc_peak_1362
22	12201171	12201515	345	12201179	3.45	2.71475	2.94086	0	P53_nolc_peak_1363
22	12309927	12310216	290	12310003	3.02	2.71475	2.65584	0	P53_nolc_peak_1364
22	12537626	12537864	239	12537805	3.45	2.71475	2.94086	0	P53_nolc_peak_1365
22	12598995	12599364	370	12599057	3.45	2.43091	2.75253	0	P53_nolc_peak_1366
22	12626625	12626857	233	12626689	3.88	2.71475	3.22588	0	P53_nolc_peak_1367
22	12707653	12707852	200	12707743	3.02	2.71475	2.65584	0	P53_nolc_peak_1368
22	15626348	15626534	187	15626444	5.18	4.78414	4.08094	0.189606	P53_nolc_peak_1369
22	15628273	15628680	408	15628535	7.77	4.98931	4.38251	0.344917	P53_nolc_peak_1370
22	15665419	15665850	432	15665541	4.31	3.71098	3.5109	0	P53_nolc_peak_1371
22	15721174	15721360	187	15721230	3.45	2.71475	2.94086	0	P53_nolc_peak_1372
22	15859883	15860116	234	15860001	5.18	4.78414	4.08094	0.189606	P53_nolc_peak_1373
22	16420642	16420828	187	16420729	4.31	3.71098	3.5109	0	P53_nolc_peak_1374
22	16527482	16527668	187	16527483	3.45	2.71475	2.94086	0	P53_nolc_peak_1375
22	16911749	16911950	202	16911840	4.31	3.71098	3.5109	0	P53_nolc_peak_1376
22	17874429	17874630	202	17874587	4.31	3.67246	3.48773	0	P53_nolc_peak_1377
22	18733643	18734000	358	18733729	10.35	5.08049	3.78446	0.422955	P53_nolc_peak_1378
22	19984433	19984766	334	19984559	8.2	6.40641	4.89458	1.46904	P53_nolc_peak_1379
22	20010514	20010740	227	20010599	5.18	3.3327	3.16153	0	P53_nolc_peak_1380
22	20410367	20410629	263	20410475	10.78	7.08521	5.27471	2.01982	P53_nolc_peak_1381
22	21149366	21149640	275	21149467	3.45	2.71475	2.94086	0	P53_nolc_peak_1382
22	22294170	22294420	251	22294315	3.88	2.62991	3.16574	0	P53_nolc_peak_1383
22	27400546	27400810	265	27400776	3.45	2.71475	2.94086	0	P53_nolc_peak_1384
22	28983246	28983623	378	28983365	6.47	5.86766	4.90342	1.05432	P53_nolc_peak_1385
22	30196184	30196434	251	30196305	4.31	3.71098	3.5109	0	P53_nolc_peak_1386
22	31647140	31647328	189	31647237	6.04	3.23535	2.95304	0	P53_nolc_peak_1387
22	32476203	32476389	187	32476327	3.45	2.57739	2.85146	0	P53_nolc_peak_1388
22	36329424	36329804	381	36329547	5.18	4.78414	4.08094	0.189606	P53_nolc_peak_1389
22	36928323	36928673	351	36928419	4.75	2.43654	2.87265	0	P53_nolc_peak_1390
22	37316959	37317145	187	37317111	3.45	2.68449	2.92145	0	P53_nolc_peak_1391
22	39312087	39312327	241	39312202	5.18	4.07298	3.65074	0	P53_nolc_peak_1392
22	39313809	39314043	235	39313892	3.02	2.71475	2.65584	0	P53_nolc_peak_1393
22	39315387	39315653	267	39315614	3.02	2.57739	2.5751	0	P53_nolc_peak_1394
22	39521151	39521470	320	39521196	5.18	3.20424	3.07328	0	P53_nolc_peak_1395
22	39523115	39523586	472	39523212	5.61	3.12312	3.22786	0	P53_nolc_peak_1396
22	41446595	41446981	387	41446691	6.04	3.37645	3.04871	0	P53_nolc_peak_1397a
22	41446595	41446981	387	41446790	5.18	2.63686	2.67505	0	P53_nolc_peak_1397b
22	47129899	47130158	260	47130029	6.04	5.57938	4.4562	0.862216	P53_nolc_peak_1398
22	50105762	50106010	249	50105898	11.65	8.45007	5.90813	3.16589	P53_nolc_peak_1399
22	50796587	50796849	263	50796723	12.94	13.7636	9.21131	7.959	P53_nolc_peak_1400
22	50807909	50808127	219	50808031	6.9	4.25964	4.08385	0	P53_nolc_peak_1401
3	1601637	1601823	187	1601703	3.88	2.71475	3.22588	0	P53_nolc_peak_1402
3	4493157	4493392	236	4493308	3.88	2.57739	3.12781	0	P53_nolc_peak_1403
3	4778205	4778408	204	4778300	7.33	4.98931	4.16682	0.344917	P53_nolc_peak_1404
3	4994990	4995190	201	4995112	9.49	6.95302	5.24529	1.92273	P53_nolc_peak_1405
3	9396817	9397226	410	9396918	5.18	3.22608	3.08834	0	P53_nolc_peak_1406
3	11530184	11530402	219	11530293	6.47	4.07966	3.73543	0	P53_nolc_peak_1407
3	14651469	14651777	309	14651532	4.75	2.97787	3.28678	0	P53_nolc_peak_1408
3	15783394	15783718	325	15783564	8.2	8.16304	5.96279	2.93722	P53_nolc_peak_1409
3	23916808	23917089	282	23916983	4.31	3.07597	3.10646	0	P53_nolc_peak_1410
3	23918868	23919054	187	23918950	3.02	2.34139	2.42958	0	P53_nolc_peak_1411
3	24487605	24487847	243	24487724	5.18	4.78414	4.08094	0.189606	P53_nolc_peak_1412
3	25153760	25154002	243	25153849	5.18	3.22608	3.08834	0	P53_nolc_peak_1413
3	28439759	28439980	222	28439864	3.88	2.71475	3.22588	0	P53_nolc_peak_1414
3	37480125	37480311	187	37480214	3.88	2.71475	3.22588	0	P53_nolc_peak_1415
3	41202941	41203156	216	41203052	3.88	2.71475	3.22588	0	P53_nolc_peak_1416
3	45593229	45593450	222	45593356	4.75	2.97787	3.28678	0	P53_nolc_peak_1417
3	45688962	45689200	239	45689081	5.61	3.89043	3.78036	0	P53_nolc_peak_1418
3	48432480	48432884	405	48432787	6.9	5.16001	4.72283	0.492089	P53_nolc_peak_1419
3	50189983	50190208	226	50190088	7.77	4.58556	4.09447	0.0996324	P53_nolc_peak_1420
3	50268227	50268533	307	50268354	6.47	4.20644	3.82395	0	P53_nolc_peak_1421
3	50350853	50351039	187	50350947	4.31	3.29088	3.2485	0	P53_nolc_peak_1422
3	50496374	50496561	188	50496460	5.61	4.57131	4.23323	0.0864371	P53_nolc_peak_1423
3	53347567	53347756	190	53347659	8.63	5.54603	4.53714	0.83354	P53_nolc_peak_1424
3	53891987	53892220	234	53892172	4.31	3.71098	3.5109	0	P53_nolc_peak_1425
3	56783856	56784182	327	56784022	3.88	2.71475	3.22588	0	P53_nolc_peak_1426
3	57756034	57756496	463	57756324	3.45	2.3854	2.72107	0	P53_nolc_peak_1427
3	58874346	58874767	422	58874541	4.75	3.71098	3.79592	0	P53_nolc_peak_1428
3	61561079	61561569	491	61561482	4.75	3.71098	3.79592	0	P53_nolc_peak_1429
3	64161830	64162249	420	64161922	3.88	2.71475	3.22588	0	P53_nolc_peak_1430
3	64186952	64187277	326	64187120	3.45	2.71475	2.94086	0	P53_nolc_peak_1431
3	75669020	75669458	439	75669255	85.85	19.8349	3.21654	13.6159	P53_nolc_peak_1432
3	75675373	75675606	234	75675509	4.31	3.71098	3.5109	0	P53_nolc_peak_1433
3	75677457	75677724	268	75677562	3.45	2.43091	2.75253	0	P53_nolc_peak_1434
3	75686834	75687262	429	75687166	4.75	3.71098	3.79592	0	P53_nolc_peak_1435
3	75687760	75688186	427	75688063	4.31	3.71098	3.5109	0	P53_nolc_peak_1436
3	75706250	75706940	691	75706801	4.31	3.71098	3.5109	0	P53_nolc_peak_1437
3	81761487	81761875	389	81761755	6.47	5.67202	4.78594	0.925403	P53_nolc_peak_1438
3	89179466	89179939	474	89179803	6.04	5.92283	4.65098	1.05432	P53_nolc_peak_1439
3	100001552	100001738	187	100001642	5.61	4.78414	4.36596	0.189606	P53_nolc_peak_1440
3	102089801	102090454	654	102090221	4.75	3.71098	3.79592	0	P53_nolc_peak_1441
3	105367576	105367808	233	105367702	4.75	3.71098	3.79592	0	P53_nolc_peak_1442
3	105372476	105372676	201	105372592	4.75	3.71098	3.79592	0	P53_nolc_peak_1443
3	106183914	106184191	278	106184113	3.45	2.71475	2.94086	0	P53_nolc_peak_1444
3	107562081	107562311	231	107562206	4.31	3.71098	3.5109	0	P53_nolc_peak_1445
3	108593764	108594013	250	108593890	4.31	3.71098	3.5109	0	P53_nolc_peak_1446
3	110889055	110889241	187	110889215	3.45	2.71475	2.94086	0	P53_nolc_peak_1447
3	111392917	111393137	221	111393020	4.31	3.71098	3.5109	0	P53_nolc_peak_1448
3	111504765	111505146	382	111505004	4.31	3.71098	3.5109	0	P53_nolc_peak_1449
3	111674404	111674692	289	111674562	4.75	2.43654	2.87265	0	P53_nolc_peak_1450
3	111978769	111978985	217	111978923	3.88	2.71475	3.22588	0	P53_nolc_peak_1451
3	119498455	119498641	187	119498507	3.88	2.43091	3.0193	0	P53_nolc_peak_1452
3	119638983	119639303	321	119639131	10.35	10.5855	7.27314	5.0544	P53_nolc_peak_1453
3	122415873	122416135	263	122416033	3.02	2.5268	2.54462	0	P53_nolc_peak_1454
3	128095261	128095464	204	128095361	3.88	2.71475	3.22588	0	P53_nolc_peak_1455
3	128178042	128178228	187	128178166	4.31	3.71098	3.5109	0	P53_nolc_peak_1456
3	130095965	130096292	328	130096085	12.08	10.8767	6.96095	5.33078	P53_nolc_peak_1457
3	131003445	131003712	268	131003547	3.88	2.43091	3.0193	0	P53_nolc_peak_1458
3	132229051	132229237	187	132229143	4.75	3.71098	3.79592	0	P53_nolc_peak_1459
3	132231773	132231959	187	132231915	3.88	2.71475	3.22588	0	P53_nolc_peak_1460
3	140423542	140423730	189	140423690	5.61	4.78414	4.36596	0.189606	P53_nolc_peak_1461
3	146160356	146160790	435	146160745	4.31	2.55954	2.7462	0	P53_nolc_peak_1462
3	146582241	146582474	234	146582306	3.88	2.71475	3.22588	0	P53_nolc_peak_1463
3	149191952	149192283	332	149192087	7.33	6.42351	5.09453	1.48435	P53_nolc_peak_1464
3	149618795	149619003	209	149618898	5.61	4.57131	4.23323	0.0864371	P53_nolc_peak_1465
3	151315961	151316180	220	151316075	4.75	3.71098	3.79592	0	P53_nolc_peak_1466
3	153160635	153161126	492	153160797	9.92	8.0153	6.18214	2.8157	P53_nolc_peak_1467
3	155854468	155854684	217	155854567	8.63	5.94877	4.8139	1.05594	P53_nolc_peak_1468
3	156044182	156044563	382	156044418	11.22	8.22221	5.56088	2.99058	P53_nolc_peak_1469
3	156760527	156760748	222	156760636	7.33	7.11857	5.50604	2.01982	P53_nolc_peak_1470
3	157160040	157160338	299	157160205	8.2	8.36482	6.07609	3.09392	P53_nolc_peak_1471
3	157160641	157160895	255	157160759	4.75	3.71098	3.79592	0	P53_nolc_peak_1472
3	157174971	157175259	289	157175079	6.47	5.31969	4.5671	0.632932	P53_nolc_peak_1473
3	159829545	159829888	344	159829745	7.33	7.11857	5.50604	2.01982	P53_nolc_peak_1474
3	159852588	159852836	249	159852739	3.45	2.71475	2.94086	0	P53_nolc_peak_1475
3	160403056	160403242	187	160403115	3.45	2.71475	2.94086	0	P53_nolc_peak_1476
3	169764985	169765171	187	169765080	5.18	3.22608	3.08834	0	P53_nolc_peak_1477
3	169772164	169772485	322	169772336	4.31	3.71098	3.5109	0	P53_nolc_peak_1478
3	171640560	171640843	284	171640682	3.02	2.68449	2.63831	0	P53_nolc_peak_1479
3	179070071	179070327	257	179070164	8.63	7.80008	6.0234	2.62516	P53_nolc_peak_1480
3	180330517	180330707	191	180330607	3.02	2.71475	2.65584	0	P53_nolc_peak_1481
3	185717864	185718137	274	185718009	4.31	3.47147	3.36387	0	P53_nolc_peak_1482
3	186075968	186076229	262	186076091	4.31	3.71098	3.5109	0	P53_nolc_peak_1483
3	186922886	186923289	404	186922984	4.31	3.4092	3.32451	0	P53_nolc_peak_1484
3	187183239	187183564	326	187183386	8.2	8.29292	6.03598	3.05403	P53_nolc_peak_1485
3	189833996	189834247	252	189834116	5.61	4.78414	4.36596	0.189606	P53_nolc_peak_1486
3	190326022	190326215	194	190326127	4.31	3.536	3.40417	0	P53_nolc_peak_1487
3	191157650	191157972	323	191157831	5.18	4.78414	4.08094	0.189606	P53_nolc_peak_1488
3	192769672	192769881	210	192769768	6.9	4.07966	3.95112	0	P53_nolc_peak_1489
3	194139249	194139493	245	194139299	4.31	2.97787	3.03999	0	P53_nolc_peak_1490
3	195187772	195187958	187	195187857	6.04	4.07966	3.51973	0	P53_nolc_peak_1491
3	196511762	196512023	262	196511890	7.77	2.9599	2.92168	0	P53_nolc_peak_1492
4	677966	678152	187	678054	6.9	2.34354	2.63408	0	P53_nolc_peak_1493
4	930136	930487	352	930186	3.45	2.68449	2.92145	0	P53_nolc_peak_1494
4	1335608	1335809	202	1335726	3.88	2.71475	3.22588	0	P53_nolc_peak_1495
4	2937281	2937559	279	2937417	6.47	5.57938	4.72929	0.862216	P53_nolc_peak_1496
4	3784611	3784797	187	3784693	4.75	3.536	3.68052	0	P53_nolc_peak_1497
4	3940092	3940358	267	3940233	11.22	10.1382	6.77133	4.65852	P53_nolc_peak_1498
4	4430685	4430925	241	4430868	4.31	3.71098	3.5109	0	P53_nolc_peak_1499
4	4541965	4542175	211	4542085	6.9	4.86783	4.52074	0.251826	P53_nolc_peak_1500
4	7705989	7706601	613	7706307	9.49	8.89926	6.48729	3.57856	P53_nolc_peak_1501
4	7706777	7706998	222	7706829	3.88	2.5268	3.09079	0	P53_nolc_peak_1502
4	9268443	9268693	251	9268566	9.49	9.65634	6.93115	4.20284	P53_nolc_peak_1503
4	9324251	9324498	248	9324386	10.35	7.99793	5.67669	2.80268	P53_nolc_peak_1504
4	9368754	9368975	222	9368846	11.22	9.08008	6.10808	3.74031	P53_nolc_peak_1505
4	15001208	15001646	439	15001345	6.9	5.57938	5.00237	0.862216	P53_nolc_peak_1506
4	15681180	15681733	554	15681457	4.31	2.43654	2.65695	0	P53_nolc_peak_1507
4	20253861	20254369	509	20254132	3.88	2.71475	3.22588	0	P53_nolc_peak_1508
4	26406737	26406923	187	26406844	3.88	2.71475	3.22588	0	P53_nolc_peak_1509
4	26583803	26584112	310	26584001	3.88	2.71475	3.22588	0	P53_nolc_peak_1510
4	31234550	31234793	244	31234674	7.33	7.11857	5.50604	2.01982	P53_nolc_peak_1511
4	33747037	33747223	187	33747121	3.88	2.71475	3.22588	0	P53_nolc_peak_1512
4	41144829	41145102	274	41144950	6.04	5.67202	4.50959	0.925403	P53_nolc_peak_1513
4	41709889	41710107	219	41710002	5.61	4.78414	4.36596	0.189606	P53_nolc_peak_1514
4	48340610	48340853	244	48340814	3.45	2.71475	2.94086	0	P53_nolc_peak_1515
4	48780179	48780480	302	48780308	4.31	3.34904	3.28607	0	P53_nolc_peak_1516
4	48832635	48832896	262	48832878	4.75	3.67246	3.77087	0	P53_nolc_peak_1517
4	49242767	49243010	244	49242887	5.18	4.78414	4.08094	0.189606	P53_nolc_peak_1518
4	49512117	49513715	1599	49512205	7.33	2.9599	2.77788	0	P53_nolc_peak_1519a
4	49512117	49513715	1599	49512480	6.04	4.25964	3.63797	0	P53_nolc_peak_1519b
4	49512117	49513715	1599	49512834	9.92	7.21944	5.64443	2.10362	P53_nolc_peak_1519c
4	49512117	49513715	1599	49513321	9.92	6.50084	5.14702	1.55104	P53_nolc_peak_1519d
4	49514287	49514563	277	49514430	6.9	3.04003	3.16596	0	P53_nolc_peak_1520
4	49519359	49519557	199	49519412	3.02	2.71475	2.65584	0	P53_nolc_peak_1521
4	49559094	49559517	424	49559170	5.61	4.57131	4.23323	0.0864371	P53_nolc_peak_1522
4	49560013	49560210	198	49560113	3.88	2.71475	3.22588	0	P53_nolc_peak_1523
4	49569076	49569489	414	49569183	6.04	5.67202	4.50959	0.925403	P53_nolc_peak_1524
4	49573353	49573701	349	49573511	3.45	2.57739	2.85146	0	P53_nolc_peak_1525
4	49574594	49574811	218	49574681	4.31	2.97787	3.03999	0	P53_nolc_peak_1526
4	49575841	49576070	230	49575908	3.88	2.57739	3.12781	0	P53_nolc_peak_1527
4	49576724	49576990	267	49576945	3.88	2.57739	3.12781	0	P53_nolc_peak_1528
4	49577735	49578220	486	49578126	4.75	3.71098	3.79592	0	P53_nolc_peak_1529
4	49579701	49580184	484	49579798	3.02	2.71475	2.65584	0	P53_nolc_peak_1530
4	49588523	49588759	237	49588651	4.31	3.71098	3.5109	0	P53_nolc_peak_1531
4	49591197	49591383	187	49591273	3.02	2.71475	2.65584	0	P53_nolc_peak_1532
4	56724069	56724387	319	56724169	3.02	2.478	2.51485	0	P53_nolc_peak_1533
4	57078842	57079127	286	57078978	6.04	5.67202	4.50959	0.925403	P53_nolc_peak_1534
4	61254472	61254681	210	61254560	4.31	3.71098	3.5109	0	P53_nolc_peak_1535
4	64581587	64581773	187	64581612	3.88	2.71475	3.22588	0	P53_nolc_peak_1536
4	74886588	74886855	268	74886725	9.92	9.65634	7.21617	4.20284	P53_nolc_peak_1537
4	76782024	76782210	187	76782114	3.88	2.43091	3.0193	0	P53_nolc_peak_1538
4	77156853	77157113	261	77156973	4.75	3.71098	3.79592	0	P53_nolc_peak_1539
4	77332986	77333263	278	77333151	3.88	2.71475	3.22588	0	P53_nolc_peak_1540
4	77880904	77881090	187	77880998	4.31	3.71098	3.5109	0	P53_nolc_peak_1541
4	83455882	83456082	201	83455984	5.18	4.78414	4.08094	0.189606	P53_nolc_peak_1542
4	98963550	98963790	241	98963655	9.49	7.21944	5.42149	2.10362	P53_nolc_peak_1543
4	102665580	102665793	214	102665665	3.45	2.71475	2.94086	0	P53_nolc_peak_1544
4	105708507	105708820	314	105708710	7.33	7.11857	5.50604	2.01982	P53_nolc_peak_1545
4	108135693	108135882	190	108135780	4.31	3.71098	3.5109	0	P53_nolc_peak_1546
4	110867566	110867826	261	110867674	4.31	3.47147	3.36387	0	P53_nolc_peak_1547
4	119454595	119454931	337	119454711	3.88	2.57739	3.12781	0	P53_nolc_peak_1548
4	121711578	121711764	187	121711630	3.02	2.71475	2.65584	0	P53_nolc_peak_1549
4	122798294	122798545	252	122798425	5.61	4.78414	4.36596	0.189606	P53_nolc_peak_1550
4	127783435	127783661	227	127783521	6.47	4.07966	3.73543	0	P53_nolc_peak_1551
4	131810639	131810875	237	131810749	4.31	3.71098	3.5109	0	P53_nolc_peak_1552
4	133148096	133148282	187	133148216	3.45	2.71475	2.94086	0	P53_nolc_peak_1553
4	135185413	135185607	195	135185504	5.61	4.78414	4.36596	0.189606	P53_nolc_peak_1554
4	139887941	139888270	330	139888073	4.31	3.71098	3.5109	0	P53_nolc_peak_1555
4	142793184	142793381	198	142793280	4.75	3.71098	3.79592	0	P53_nolc_peak_1556
4	151099467	151099819	353	151099600	4.31	3.71098	3.5109	0	P53_nolc_peak_1557
4	152352618	152352921	304	152352756	6.9	5.92283	5.22102	1.05432	P53_nolc_peak_1558
4	156771501	156771778	278	156771589	6.04	4.07966	3.51973	0	P53_nolc_peak_1559
4	165383827	165384106	280	165384009	3.88	2.71475	3.22588	0	P53_nolc_peak_1560
4	172982314	172982500	187	172982480	3.45	2.71475	2.94086	0	P53_nolc_peak_1561
4	176195323	176195509	187	176195411	3.45	2.57739	2.85146	0	P53_nolc_peak_1562
4	186029588	186029787	200	186029728	4.31	3.71098	3.5109	0	P53_nolc_peak_1563
4	189987451	189987637	187	189987527	3.45	2.3854	2.72107	0	P53_nolc_peak_1564
4	190108917	190109584	668	190109090	5.61	3.22608	3.30404	0	P53_nolc_peak_1565
4	190109932	190110124	193	190110022	4.31	3.29088	3.2485	0	P53_nolc_peak_1566
4	190115954	190116191	238	190116090	9.92	4.33257	3.64066	0	P53_nolc_peak_1567
4	190122728	190123119	392	190123008	8.63	8.0378	6.16772	2.83027	P53_nolc_peak_1568
5	11442	11701	260	11570	10.78	7.99793	5.89238	2.80268	P53_nolc_peak_1569
5	14757	14950	194	14872	6.04	4.86783	4.02715	0.251826	P53_nolc_peak_1570
5	624966	625152	187	625051	4.31	3.34904	3.28607	0	P53_nolc_peak_1571
5	10528557	10528743	187	10528728	5.61	3.22608	3.30404	0	P53_nolc_peak_1572
5	27471914	27472318	405	27472156	20.28	25.999	14.0567	19.3524	P53_nolc_peak_1573
5	29191679	29191906	228	29191801	4.75	3.536	3.68052	0	P53_nolc_peak_1574
5	34854533	34854719	187	34854616	4.31	3.71098	3.5109	0	P53_nolc_peak_1575
5	36151239	36151468	230	36151289	3.02	2.57739	2.5751	0	P53_nolc_peak_1576
5	36442382	36442596	215	36442519	9.06	8.1152	5.75469	2.89994	P53_nolc_peak_1577
5	36878388	36878574	187	36878503	3.45	2.71475	2.94086	0	P53_nolc_peak_1578
5	37847972	37848202	231	37848075	8.2	5.94877	4.59821	1.05594	P53_nolc_peak_1579
5	40601175	40601554	380	40601400	4.75	2.43654	2.87265	0	P53_nolc_peak_1580
5	40835212	40835424	213	40835308	6.04	4.07966	3.51973	0	P53_nolc_peak_1581
5	42656004	42656264	261	42656075	3.88	2.71475	3.22588	0	P53_nolc_peak_1582
5	50423354	50423707	354	50423490	5.18	3.22608	3.08834	0	P53_nolc_peak_1583
5	54310609	54310795	187	54310767	5.18	4.78414	4.08094	0.189606	P53_nolc_peak_1584
5	54404545	54404850	306	54404699	9.06	9.57607	6.60226	4.17616	P53_nolc_peak_1585
5	57067590	57067869	280	57067744	9.49	7.46617	5.58337	2.33783	P53_nolc_peak_1586
5	57494746	57494956	211	57494857	4.31	3.71098	3.5109	0	P53_nolc_peak_1587
5	58462136	58462356	221	58462246	7.33	5.67201	4.61928	0.925403	P53_nolc_peak_1588
5	59021626	59021812	187	59021726	3.02	2.71475	2.65584	0	P53_nolc_peak_1589
5	59745330	59745518	189	59745498	3.02	2.57739	2.5751	0	P53_nolc_peak_1590
5	65562737	65563020	284	65562856	4.31	3.71098	3.5109	0	P53_nolc_peak_1591
5	66597519	66597757	239	66597622	4.75	2.43654	2.87265	0	P53_nolc_peak_1592
5	67021074	67021314	241	67021181	4.31	3.536	3.40417	0	P53_nolc_peak_1593
5	67094859	67095074	216	67094963	6.04	4.07966	3.51973	0	P53_nolc_peak_1594
5	68262473	68262861	389	68262648	17.69	21.2271	12.3465	14.88	P53_nolc_peak_1595
5	69634961	69635170	210	69635049	5.61	4.78414	4.36596	0.189606	P53_nolc_peak_1596
5	72572401	72572694	294	72572552	6.9	5.92283	5.22102	1.05432	P53_nolc_peak_1597
5	74641194	74641440	247	74641247	3.45	2.71475	2.94086	0	P53_nolc_peak_1598
5	81855743	81855942	200	81855828	4.31	3.71098	3.5109	0	P53_nolc_peak_1599
5	82387259	82387457	199	82387313	3.02	2.71475	2.65584	0	P53_nolc_peak_1600
5	83077137	83077469	333	83077338	4.31	3.71098	3.5109	0	P53_nolc_peak_1601
5	83471549	83471794	246	83471615	4.31	3.71098	3.5109	0	P53_nolc_peak_1602
5	83473203	83473441	239	83473384	3.88	2.71475	3.22588	0	P53_nolc_peak_1603
5	88665758	88665944	187	88665844	4.31	3.71098	3.5109	0	P53_nolc_peak_1604
5	93677345	93677574	230	93677471	6.04	5.92283	4.65098	1.05432	P53_nolc_peak_1605
5	95554771	95555034	264	95554831	3.02	2.68449	2.63831	0	P53_nolc_peak_1606
5	95859018	95859266	249	95859163	3.45	2.71475	2.94086	0	P53_nolc_peak_1607
5	103119863	103120522	660	103120210	6.04	5.92283	4.65098	1.05432	P53_nolc_peak_1608
5	107655913	107656130	218	107656024	6.47	5.92283	4.936	1.05432	P53_nolc_peak_1609
5	107671407	107671608	202	107671560	4.31	3.71098	3.5109	0	P53_nolc_peak_1610
5	108367934	108368339	406	108368051	4.31	3.71098	3.5109	0	P53_nolc_peak_1611
5	111092189	111092397	209	111092273	5.61	3.22608	3.30404	0	P53_nolc_peak_1612
5	113675160	113675385	226	113675333	3.88	2.71475	3.22588	0	P53_nolc_peak_1613
5	116085131	116085335	205	116085151	4.75	2.43654	2.87265	0	P53_nolc_peak_1614
5	119388000	119388263	264	119388117	4.31	3.23459	3.21179	0	P53_nolc_peak_1615
5	120553193	120553379	187	120553280	4.31	3.71098	3.5109	0	P53_nolc_peak_1616
5	124902338	124902524	187	124902423	3.45	2.478	2.78474	0	P53_nolc_peak_1617
5	126595063	126595249	187	126595105	4.31	2.43654	2.65695	0	P53_nolc_peak_1618
5	127112339	127112555	217	127112503	3.45	2.57739	2.85146	0	P53_nolc_peak_1619
5	128536362	128536837	476	128536430	3.88	2.71475	3.22588	0	P53_nolc_peak_1620
5	136108392	136108636	245	136108496	4.31	3.71098	3.5109	0	P53_nolc_peak_1621
5	136194024	136194210	187	136194143	3.02	2.34139	2.42958	0	P53_nolc_peak_1622
5	140711061	140711403	343	140711312	6.9	4.05368	3.93186	0	P53_nolc_peak_1623
5	140718842	140719028	187	140718931	7.33	4.17142	3.6092	0	P53_nolc_peak_1624
5	143061573	143061861	289	143061820	5.18	3.22608	3.08834	0	P53_nolc_peak_1625
5	143062036	143062222	187	143062144	3.88	2.57739	3.12781	0	P53_nolc_peak_1626
5	144132980	144133166	187	144133064	3.88	2.71475	3.22588	0	P53_nolc_peak_1627
5	145544088	145544299	212	145544228	3.88	2.71475	3.22588	0	P53_nolc_peak_1628
5	146461334	146461520	187	146461501	3.45	2.68449	2.92145	0	P53_nolc_peak_1629
5	150700413	150700599	187	150700506	4.75	3.536	3.68052	0	P53_nolc_peak_1630
5	152812009	152812330	322	152812146	7.33	7.11857	5.50604	2.01982	P53_nolc_peak_1631
5	157464796	157465096	301	157464846	3.45	2.62991	2.88603	0	P53_nolc_peak_1632
5	157535393	157535656	264	157535453	3.02	2.3854	2.45735	0	P53_nolc_peak_1633
5	158739939	158740125	187	158739985	3.45	2.71475	2.94086	0	P53_nolc_peak_1634
5	160205221	160205525	305	160205352	9.06	6.18978	4.54037	1.27007	P53_nolc_peak_1635
5	160422093	160422279	187	160422152	3.02	2.62991	2.60632	0	P53_nolc_peak_1636
5	163504556	163504768	213	163504717	3.88	2.68449	3.20459	0	P53_nolc_peak_1637
5	163753938	163754124	187	163754011	3.45	2.71475	2.94086	0	P53_nolc_peak_1638
5	164119898	164120161	264	164120028	9.92	6.70165	5.28679	1.726	P53_nolc_peak_1639
5	167352777	167352963	187	167352870	4.31	3.71098	3.5109	0	P53_nolc_peak_1640
5	169290088	169290433	346	169290236	3.02	2.57739	2.5751	0	P53_nolc_peak_1641
5	169831442	169831628	187	169831541	4.31	3.60294	3.44544	0	P53_nolc_peak_1642
5	172006431	172006617	187	172006484	4.31	2.43654	2.65695	0	P53_nolc_peak_1643
5	173292433	173292632	200	173292527	6.04	4.0049	3.47028	0	P53_nolc_peak_1644
5	173315841	173316027	187	173315977	4.75	3.536	3.68052	0	P53_nolc_peak_1645
5	174328561	174329025	465	174328867	12.94	12.451	8.42654	6.76431	P53_nolc_peak_1646
5	174425348	174425587	240	174425454	5.61	4.20404	3.994	0	P53_nolc_peak_1647
5	176034922	176035153	232	176035082	3.88	2.3854	2.98479	0	P53_nolc_peak_1648
5	176388944	176389312	369	176389067	5.61	3.94954	3.82124	0	P53_nolc_peak_1649
5	176397218	176397436	219	176397331	9.49	6.01575	4.61815	1.11813	P53_nolc_peak_1650
5	177270091	177270308	218	177270188	6.9	3.60706	3.59716	0	P53_nolc_peak_1651
5	177351621	177352072	452	177351814	4.75	2.52314	2.94073	0	P53_nolc_peak_1652
5	179623388	179623758	371	179623582	6.47	3.5669	3.37209	0	P53_nolc_peak_1653
5	181188830	181189120	291	181188989	10.35	7.2853	5.21251	2.16753	P53_nolc_peak_1654
5	181207657	181207874	218	181207769	9.49	5.54163	4.2996	0.833156	P53_nolc_peak_1655
5	181218177	181218420	244	181218306	8.63	4.56586	3.8573	0.0864371	P53_nolc_peak_1656
5	181221939	181222703	765	181222034	6.04	4.07966	3.51973	0	P53_nolc_peak_1657a
5	181221939	181222703	765	181222440	8.2	5.94877	4.59821	1.05594	P53_nolc_peak_1657b
6	1608281	1608467	187	1608364	4.31	2.75526	2.88564	0	P53_nolc_peak_1658
6	4320836	4321059	224	4320938	5.61	4.78414	4.36596	0.189606	P53_nolc_peak_1659
6	4383861	4384069	209	4383971	6.04	4.07966	3.51973	0	P53_nolc_peak_1660
6	6737264	6737631	368	6737443	3.88	2.71475	3.22588	0	P53_nolc_peak_1661
6	10403729	10404017	289	10403892	3.02	2.71475	2.65584	0	P53_nolc_peak_1662
6	18090350	18090607	258	18090454	5.18	3.04532	2.96301	0	P53_nolc_peak_1663
6	19841522	19841760	239	19841606	3.02	2.71475	2.65584	0	P53_nolc_peak_1664
6	20835359	20835659	301	20835500	9.92	6.95302	5.46099	1.92273	P53_nolc_peak_1665
6	20866733	20867015	283	20866904	4.31	3.536	3.40417	0	P53_nolc_peak_1666
6	21188487	21188910	424	21188651	3.45	2.57739	2.85146	0	P53_nolc_peak_1667a
6	21188487	21188910	424	21188768	4.75	3.536	3.68052	0	P53_nolc_peak_1667b
6	26027205	26027391	187	26027294	3.88	2.71475	3.22588	0	P53_nolc_peak_1668
6	26031760	26032066	307	26031928	8.2	8.36482	6.07609	3.09392	P53_nolc_peak_1669
6	26055489	26055675	187	26055583	3.88	2.3854	2.98479	0	P53_nolc_peak_1670
6	26103813	26104179	367	26103830	5.18	3.22608	3.08834	0	P53_nolc_peak_1671
6	26156339	26157026	688	26156436	3.88	2.5268	3.09079	0	P53_nolc_peak_1672a
6	26156339	26157026	688	26156922	5.61	4.2727	4.03966	0	P53_nolc_peak_1672b
6	26199079	26199292	214	26199194	3.88	2.68449	3.20459	0	P53_nolc_peak_1673
6	26204324	26204966	643	26204505	3.02	2.57739	2.5751	0	P53_nolc_peak_1674
6	26285297	26285637	341	26285368	3.88	2.71475	3.22588	0	P53_nolc_peak_1675
6	26286407	26286705	299	26286504	4.75	3.536	3.68052	0	P53_nolc_peak_1676
6	26311694	26312210	517	26311813	4.31	3.29088	3.2485	0	P53_nolc_peak_1677
6	26312533	26312844	312	26312679	6.47	5.48991	4.67396	0.783908	P53_nolc_peak_1678
6	26322786	26323017	232	26322928	5.18	4.57131	3.95688	0.0864371	P53_nolc_peak_1679
6	26327569	26328324	756	26327662	6.47	4.07966	3.73543	0	P53_nolc_peak_1680a
6	26327569	26328324	756	26328153	6.47	5.92283	4.936	1.05432	P53_nolc_peak_1680b
6	26330248	26330525	278	26330360	5.18	4.78414	4.08094	0.189606	P53_nolc_peak_1681
6	26331414	26331624	211	26331510	3.88	2.71475	3.22588	0	P53_nolc_peak_1682
6	26521016	26521283	268	26521127	6.04	4.25964	3.63797	0	P53_nolc_peak_1683
6	26532781	26533055	275	26532959	6.04	4.07966	3.51973	0	P53_nolc_peak_1684
6	26749852	26750049	198	26749955	3.45	2.71475	2.94086	0	P53_nolc_peak_1685
6	27132422	27132764	343	27132548	3.88	2.71475	3.22588	0	P53_nolc_peak_1686
6	27132967	27133189	223	27133048	3.88	2.57739	3.12781	0	P53_nolc_peak_1687
6	27146058	27146268	211	27146151	4.31	3.4092	3.32451	0	P53_nolc_peak_1688
6	27146693	27146920	228	27146785	4.31	3.34904	3.28607	0	P53_nolc_peak_1689
6	27295354	27295546	193	27295437	4.31	3.60294	3.44544	0	P53_nolc_peak_1690
6	27333099	27333285	187	27333185	4.31	3.23459	3.21179	0	P53_nolc_peak_1691
6	27495739	27496044	306	27495906	3.88	2.478	3.05463	0	P53_nolc_peak_1692
6	27505791	27505977	187	27505912	4.75	3.71098	3.79592	0	P53_nolc_peak_1693
6	27519322	27519612	291	27519511	3.88	2.71475	3.22588	0	P53_nolc_peak_1694
6	27553375	27553716	342	27553473	5.61	3.22608	3.30404	0	P53_nolc_peak_1695
6	27592736	27592972	237	27592845	6.47	4.93777	4.32016	0.317203	P53_nolc_peak_1696
6	27602421	27602684	264	27602470	4.31	2.43654	2.65695	0	P53_nolc_peak_1697
6	27631270	27631472	203	27631363	4.31	3.71098	3.5109	0	P53_nolc_peak_1698
6	27795817	27796046	230	27795952	4.31	3.34904	3.28607	0	P53_nolc_peak_1699
6	27810078	27810361	284	27810224	3.88	2.71475	3.22588	0	P53_nolc_peak_1700
6	27823941	27824179	239	27824074	7.77	4.98931	4.38251	0.344917	P53_nolc_peak_1701
6	27902453	27903013	561	27902892	5.18	3.89043	3.53357	0	P53_nolc_peak_1702
6	28212738	28213157	420	28213025	5.18	3.22608	3.08834	0	P53_nolc_peak_1703
6	28356214	28356400	187	28356255	3.45	2.57739	2.85146	0	P53_nolc_peak_1704
6	28447133	28447319	187	28447305	3.45	2.57739	2.85146	0	P53_nolc_peak_1705
6	28542856	28543250	395	28543155	4.75	3.34904	3.55284	0	P53_nolc_peak_1706
6	28589215	28589802	588	28589583	3.45	2.34139	2.69031	0	P53_nolc_peak_1707
6	28648173	28648420	248	28648226	3.88	2.71475	3.22588	0	P53_nolc_peak_1708
6	28795974	28796220	247	28796022	4.31	2.43654	2.65695	0	P53_nolc_peak_1709
6	28817158	28817398	241	28817267	5.18	4.20404	3.73326	0	P53_nolc_peak_1710
6	28863636	28863977	342	28863751	6.9	5.16001	4.72283	0.492089	P53_nolc_peak_1711
6	28896221	28896489	269	28896342	8.63	6.25802	5.02417	1.3301	P53_nolc_peak_1712
6	28943579	28943942	364	28943652	3.45	2.71475	2.94086	0	P53_nolc_peak_1713
6	28944200	28944608	409	28944320	3.88	2.71475	3.22588	0	P53_nolc_peak_1714
6	28982096	28982303	208	28982187	3.88	2.62991	3.16574	0	P53_nolc_peak_1715
6	31328717	31328913	197	31328823	8.2	5.26929	4.15094	0.589367	P53_nolc_peak_1716
6	31390526	31390789	264	31390657	6.04	5.67202	4.50959	0.925403	P53_nolc_peak_1717
6	31487437	31487817	381	31487608	9.49	9.29114	6.72043	3.92368	P53_nolc_peak_1718
6	31829688	31829904	217	31829790	6.04	3.41323	3.0736	0	P53_nolc_peak_1719
6	32894691	32894963	273	32894816	6.04	2.34354	2.34649	0	P53_nolc_peak_1720
6	32970089	32970275	187	32970219	5.61	3.72256	3.66281	0	P53_nolc_peak_1721
6	32972287	32972629	343	32972333	6.04	2.5	2.45278	0	P53_nolc_peak_1722
6	32982088	32982902	815	32982404	4.31	3.536	3.40417	0	P53_nolc_peak_1723
6	32983168	32983354	187	32983256	4.31	3.34904	3.28607	0	P53_nolc_peak_1724
6	35470423	35470611	189	35470514	6.47	4.36972	3.937	0	P53_nolc_peak_1725
6	36594128	36594499	372	36594396	6.04	3.30473	3.00011	0	P53_nolc_peak_1726
6	36667172	36667358	187	36667267	7.33	4.63586	3.92726	0.14202	P53_nolc_peak_1727
6	36676252	36676649	398	36676461	19.41	13.1909	6.80419	7.45098	P53_nolc_peak_1728
6	37244882	37245069	188	37244973	7.33	5.19801	4.30679	0.524824	P53_nolc_peak_1729
6	41189970	41190170	201	41190060	3.45	2.71475	2.94086	0	P53_nolc_peak_1730
6	41846596	41846824	229	41846721	8.2	4.82736	3.85788	0.22661	P53_nolc_peak_1731
6	43096643	43096841	199	43096753	5.18	3.24612	3.10215	0	P53_nolc_peak_1732
6	43496533	43496719	187	43496622	5.61	4.78414	4.36596	0.189606	P53_nolc_peak_1733
6	44246862	44247097	236	44246985	9.49	7.55224	5.6395	2.40972	P53_nolc_peak_1734
6	45613742	45614009	268	45613868	9.06	9.65634	6.64613	4.20284	P53_nolc_peak_1735
6	47670003	47670293	291	47670154	7.77	7.11857	5.79107	2.01982	P53_nolc_peak_1736
6	57799980	57800335	356	57800151	4.75	3.71098	3.79592	0	P53_nolc_peak_1737
6	63573620	63573901	282	63573712	10.78	3.53412	2.94619	0	P53_nolc_peak_1738
6	71367855	71368093	239	71367992	4.75	3.71098	3.79592	0	P53_nolc_peak_1739
6	72182995	72183181	187	72183085	3.88	2.71475	3.22588	0	P53_nolc_peak_1740
6	73520724	73521432	709	73520850	5.61	4.65276	4.28456	0.153249	P53_nolc_peak_1741
6	75272179	75272539	361	75272309	7.33	7.11857	5.50604	2.01982	P53_nolc_peak_1742
6	78858311	78858522	212	78858417	5.18	4.78414	4.08094	0.189606	P53_nolc_peak_1743
6	80536277	80536554	278	80536416	6.9	5.92283	5.22102	1.05432	P53_nolc_peak_1744
6	80761450	80761636	187	80761572	3.02	2.71475	2.65584	0	P53_nolc_peak_1745
6	93698494	93698692	199	93698595	5.18	4.78414	4.08094	0.189606	P53_nolc_peak_1746
6	94501634	94501946	313	94501792	5.61	4.78414	4.36596	0.189606	P53_nolc_peak_1747
6	95576672	95576858	187	95576713	3.45	2.71475	2.94086	0	P53_nolc_peak_1748
6	96521650	96521890	241	96521742	4.31	3.71098	3.5109	0	P53_nolc_peak_1749
6	99568686	99568911	226	99568812	5.61	4.01036	3.86302	0	P53_nolc_peak_1750
6	99836495	99836731	237	99836622	6.47	4.07966	3.73543	0	P53_nolc_peak_1751
6	110874640	110874882	243	110874748	6.47	4.93777	4.32016	0.317203	P53_nolc_peak_1752
6	111107027	111107406	380	111107229	16.39	14.9606	8.69642	9.09588	P53_nolc_peak_1753
6	111484038	111484292	255	111484147	11.22	5.7411	3.99612	0.991437	P53_nolc_peak_1754
6	111987424	111987652	229	111987518	8.2	6.98599	5.26111	1.94806	P53_nolc_peak_1755
6	112331274	112331578	305	112331443	7.77	6.82969	5.61501	1.83626	P53_nolc_peak_1756
6	113632427	113632656	230	113632557	6.04	4.25964	3.63797	0	P53_nolc_peak_1757
6	116254011	116254210	200	116254061	3.88	2.34139	2.95105	0	P53_nolc_peak_1758
6	116571236	116571593	358	116571327	6.9	4.07966	3.95112	0	P53_nolc_peak_1759
6	117047383	117047569	187	117047429	3.02	2.57739	2.5751	0	P53_nolc_peak_1760
6	117675140	117675467	328	117675363	5.61	3.22608	3.30404	0	P53_nolc_peak_1761
6	118212974	118213178	205	118213081	5.18	4.73731	4.05401	0.189606	P53_nolc_peak_1762
6	118574020	118574409	390	118574152	14.67	8.41215	5.22242	3.13453	P53_nolc_peak_1763
6	120884249	120884461	213	120884343	5.18	4.78414	4.08094	0.189606	P53_nolc_peak_1764
6	122049357	122049693	337	122049534	4.75	3.71098	3.79592	0	P53_nolc_peak_1765
6	122640435	122640718	284	122640644	3.02	2.71475	2.65584	0	P53_nolc_peak_1766
6	123841548	123841762	215	123841591	3.02	2.71475	2.65584	0	P53_nolc_peak_1767
6	124090629	124090821	193	124090785	5.61	4.78414	4.36596	0.189606	P53_nolc_peak_1768
6	125046112	125046338	227	125046222	6.47	5.92283	4.936	1.05432	P53_nolc_peak_1769
6	125584565	125584852	288	125584704	4.75	3.71098	3.79592	0	P53_nolc_peak_1770
6	125780171	125780402	232	125780298	9.06	8.1152	5.75469	2.89994	P53_nolc_peak_1771
6	125910996	125911314	319	125911106	5.18	4.57131	3.95688	0.0864371	P53_nolc_peak_1772
6	125946363	125946625	263	125946514	4.31	3.536	3.40417	0	P53_nolc_peak_1773
6	126340429	126340732	304	126340566	4.31	3.71098	3.5109	0	P53_nolc_peak_1774
6	126806583	126806806	224	126806757	3.88	2.71475	3.22588	0	P53_nolc_peak_1775
6	127586382	127586595	214	127586557	4.75	2.97787	3.28678	0	P53_nolc_peak_1776
6	127632475	127632701	227	127632648	6.04	5.92283	4.65098	1.05432	P53_nolc_peak_1777
6	131815901	131816092	192	131816080	5.61	3.22608	3.30404	0	P53_nolc_peak_1778
6	131816242	131816477	236	131816360	6.04	5.86766	4.62029	1.05432	P53_nolc_peak_1779
6	132365594	132365817	224	132365684	5.18	3.22608	3.08834	0	P53_nolc_peak_1780
6	133247817	133248020	204	133247913	3.88	2.57739	3.12781	0	P53_nolc_peak_1781
6	133339433	133339619	187	133339612	4.31	3.71098	3.5109	0	P53_nolc_peak_1782
6	134725093	134725338	246	134725164	3.45	2.71475	2.94086	0	P53_nolc_peak_1783
6	135033582	135033911	330	135033759	3.88	2.62991	3.16574	0	P53_nolc_peak_1784
6	139150869	139151230	362	139151074	9.49	9.15609	6.64087	3.81036	P53_nolc_peak_1785
6	139373084	139373456	373	139373384	4.31	2.97787	3.03999	0	P53_nolc_peak_1786
6	139374277	139374582	306	139374568	4.31	2.55954	2.7462	0	P53_nolc_peak_1787
6	139764641	139764890	250	139764727	3.45	2.71475	2.94086	0	P53_nolc_peak_1788
6	141897781	141897967	187	141897926	3.88	2.71475	3.22588	0	P53_nolc_peak_1789
6	142147080	142147286	207	142147162	6.04	5.76803	4.56427	1.01322	P53_nolc_peak_1790
6	142187328	142187514	187	142187417	4.75	3.67246	3.77087	0	P53_nolc_peak_1791
6	143450666	143450864	199	143450761	6.9	4.31405	4.1237	0	P53_nolc_peak_1792
6	144216289	144216637	349	144216529	6.04	2.34354	2.34649	0	P53_nolc_peak_1793
6	145331056	145331242	187	145331191	3.88	2.71475	3.22588	0	P53_nolc_peak_1794
6	145813624	145814001	378	145813679	3.88	2.71475	3.22588	0	P53_nolc_peak_1795
6	147044379	147044567	189	147044476	4.31	3.71098	3.5109	0	P53_nolc_peak_1796
6	149336660	149336947	288	149336833	6.04	4.54488	3.82268	0.0808944	P53_nolc_peak_1797
6	150647564	150648033	470	150647615	3.45	2.478	2.78474	0	P53_nolc_peak_1798
6	150857199	150857505	307	150857348	12.08	12.2994	7.81672	6.64087	P53_nolc_peak_1799
6	151558042	151558323	282	151558204	8.63	5.94877	4.8139	1.05594	P53_nolc_peak_1800
6	152979252	152979438	187	152979344	3.02	2.57739	2.5751	0	P53_nolc_peak_1801
6	153436343	153436627	285	153436486	7.77	7.11857	5.79107	2.01982	P53_nolc_peak_1802
6	154076559	154076745	187	154076658	5.18	3.22608	3.08834	0	P53_nolc_peak_1803
6	156849599	156849809	211	156849728	3.02	2.71475	2.65584	0	P53_nolc_peak_1804
6	157298351	157298630	280	157298523	8.63	6.1863	4.97561	1.26859	P53_nolc_peak_1805
6	157312851	157313132	282	157312989	15.53	5.31046	3.30601	0.627569	P53_nolc_peak_1806
6	158049675	158049877	203	158049765	6.04	4.0049	3.47028	0	P53_nolc_peak_1807
6	158405454	158405857	404	158405682	5.61	4.34361	4.08637	0	P53_nolc_peak_1808
6	158999793	159000055	263	158999878	4.75	2.43654	2.87265	0	P53_nolc_peak_1809
6	159252932	159253328	397	159253088	8.2	8.36482	6.07609	3.09392	P53_nolc_peak_1810
6	161033803	161033989	187	161033887	3.45	2.71475	2.94086	0	P53_nolc_peak_1811
6	161705824	161706010	187	161705980	3.88	2.71475	3.22588	0	P53_nolc_peak_1812
6	163577410	163577596	187	163577549	3.45	2.71475	2.94086	0	P53_nolc_peak_1813
6	164408954	164409171	218	164409101	4.31	3.71098	3.5109	0	P53_nolc_peak_1814
6	164927605	164927828	224	164927725	4.31	3.71098	3.5109	0	P53_nolc_peak_1815
6	165181929	165182115	187	165182094	3.88	2.71475	3.22588	0	P53_nolc_peak_1816
6	165847348	165847582	235	165847480	5.18	4.57131	3.95688	0.0864371	P53_nolc_peak_1817
6	166032926	166033123	198	166033007	3.02	2.71475	2.65584	0	P53_nolc_peak_1818
6	166347902	166348177	276	166348033	9.49	7.55224	5.6395	2.40972	P53_nolc_peak_1819
6	166561864	166562050	187	166561969	3.88	2.71475	3.22588	0	P53_nolc_peak_1820
6	167952419	167952744	326	167952695	4.31	3.71098	3.5109	0	P53_nolc_peak_1821
6	169224248	169224616	369	169224336	5.18	4.65276	4.00485	0.153249	P53_nolc_peak_1822
6	169709080	169709266	187	169709162	4.31	3.71098	3.5109	0	P53_nolc_peak_1823
6	169831734	169831920	187	169831819	3.02	2.62991	2.60632	0	P53_nolc_peak_1824
6	170502467	170502694	228	170502568	3.88	2.71475	3.22588	0	P53_nolc_peak_1825
6	170552989	170553257	269	170553240	4.31	2.43654	2.65695	0	P53_nolc_peak_1826
7	2035173	2035360	188	2035257	6.04	5.31969	4.30338	0.632932	P53_nolc_peak_1827
7	2036235	2036480	246	2036355	8.63	7.80008	6.0234	2.62516	P53_nolc_peak_1828
7	6332060	6332268	209	6332172	6.47	4.07966	3.73543	0	P53_nolc_peak_1829
7	12731399	12731621	223	12731560	3.45	2.68449	2.92145	0	P53_nolc_peak_1830
7	14081146	14081417	272	14081323	3.88	2.71475	3.22588	0	P53_nolc_peak_1831
7	14687798	14687994	197	14687992	4.75	3.71098	3.79592	0	P53_nolc_peak_1832
7	20353065	20353251	187	20353238	3.02	2.71475	2.65584	0	P53_nolc_peak_1833
7	25804171	25804409	239	25804319	5.18	3.89043	3.53357	0	P53_nolc_peak_1834
7	25856076	25856291	216	25856184	4.75	3.67246	3.77087	0	P53_nolc_peak_1835
7	25857374	25857757	384	25857488	4.75	3.71098	3.79592	0	P53_nolc_peak_1836
7	25949826	25950012	187	25950003	3.02	2.71475	2.65584	0	P53_nolc_peak_1837
7	26200233	26200419	187	26200381	4.75	2.43654	2.87265	0	P53_nolc_peak_1838
7	27099076	27099604	529	27099220	3.88	2.71475	3.22588	0	P53_nolc_peak_1839
7	27140066	27140759	694	27140661	4.31	3.71098	3.5109	0	P53_nolc_peak_1840
7	27144838	27145167	330	27145008	4.75	3.71098	3.79592	0	P53_nolc_peak_1841
7	27147499	27147744	246	27147639	3.02	2.71475	2.65584	0	P53_nolc_peak_1842
7	27147919	27148411	493	27148218	4.75	3.71098	3.79592	0	P53_nolc_peak_1843
7	27150914	27151375	462	27151041	4.31	3.71098	3.5109	0	P53_nolc_peak_1844
7	27162197	27162642	446	27162294	4.75	2.43654	2.87265	0	P53_nolc_peak_1845
7	27170951	27171640	690	27171266	5.18	3.22608	3.08834	0	P53_nolc_peak_1846
7	27171826	27172015	190	27171915	4.31	3.60294	3.44544	0	P53_nolc_peak_1847
7	27176209	27176395	187	27176301	3.88	2.71475	3.22588	0	P53_nolc_peak_1848
7	30026810	30026996	187	30026877	3.02	2.34139	2.42958	0	P53_nolc_peak_1849
7	30163676	30163951	276	30163831	5.61	4.57131	4.23323	0.0864371	P53_nolc_peak_1850
7	30310701	30311021	321	30310847	6.47	5.92283	4.936	1.05432	P53_nolc_peak_1851
7	30407076	30407374	299	30407235	7.77	7.11857	5.79107	2.01982	P53_nolc_peak_1852
7	31060093	31060292	200	31060202	6.47	5.67202	4.78594	0.925403	P53_nolc_peak_1853
7	33287892	33288195	304	33288057	6.47	5.92283	4.936	1.05432	P53_nolc_peak_1854
7	35800430	35800755	326	35800482	3.02	2.71475	2.65584	0	P53_nolc_peak_1855
7	40717304	40717711	408	40717463	16.39	19.6817	11.4915	13.4726	P53_nolc_peak_1856
7	42233063	42233460	398	42233165	3.45	2.71475	2.94086	0	P53_nolc_peak_1857
7	44246384	44246606	223	44246510	8.2	5.54603	4.33384	0.83354	P53_nolc_peak_1858
7	48088543	48088729	187	48088595	4.31	2.97787	3.03999	0	P53_nolc_peak_1859
7	52184060	52184309	250	52184183	5.18	4.78414	4.08094	0.189606	P53_nolc_peak_1860
7	55065622	55065888	267	55065737	4.31	3.71098	3.5109	0	P53_nolc_peak_1861
7	56816986	56817218	233	56817088	6.04	5.67202	4.50959	0.925403	P53_nolc_peak_1862
7	63578768	63578971	204	63578868	3.88	2.34139	2.95105	0	P53_nolc_peak_1863
7	64638725	64638911	187	64638820	4.31	3.71098	3.5109	0	P53_nolc_peak_1864
7	64849423	64849710	288	64849616	3.02	2.68449	2.63831	0	P53_nolc_peak_1865
7	70708026	70708214	189	70708130	5.18	4.78414	4.08094	0.189606	P53_nolc_peak_1866
7	75528082	75528271	190	75528174	10.35	7.15077	5.12452	2.04745	P53_nolc_peak_1867
7	79312169	79312355	187	79312250	3.45	2.71475	2.94086	0	P53_nolc_peak_1868
7	80151202	80151435	234	80151328	3.88	2.68449	3.20459	0	P53_nolc_peak_1869
7	80277834	80278093	260	80277978	6.04	5.92283	4.65098	1.05432	P53_nolc_peak_1870
7	80665635	80665893	259	80665766	6.9	5.92283	5.22102	1.05432	P53_nolc_peak_1871
7	81623291	81623642	352	81623397	4.31	3.71098	3.5109	0	P53_nolc_peak_1872
7	82382318	82382543	226	82382408	4.31	3.71098	3.5109	0	P53_nolc_peak_1873
7	83263442	83263798	357	83263638	3.88	2.71475	3.22588	0	P53_nolc_peak_1874
7	85186420	85186615	196	85186563	4.31	3.536	3.40417	0	P53_nolc_peak_1875
7	92048258	92048448	191	92048402	4.75	3.536	3.68052	0	P53_nolc_peak_1876
7	92634977	92635163	187	92635048	3.45	2.71475	2.94086	0	P53_nolc_peak_1877
7	93921735	93922048	314	93921778	3.02	2.71475	2.65584	0	P53_nolc_peak_1878
7	100029722	100029908	187	100029778	5.18	3.08382	2.98983	0	P53_nolc_peak_1879
7	100091490	100091703	214	100091621	4.31	3.23459	3.21179	0	P53_nolc_peak_1880
7	102531718	102531904	187	102531803	5.61	4.34361	4.08637	0	P53_nolc_peak_1881
7	102675711	102675913	203	102675806	7.33	4.98931	4.16682	0.344917	P53_nolc_peak_1882
7	104207909	104208138	230	104208009	4.31	3.67246	3.48773	0	P53_nolc_peak_1883
7	105014013	105014291	279	105014237	6.47	4.07966	3.73543	0	P53_nolc_peak_1884
7	105018594	105018796	203	105018657	3.88	2.71475	3.22588	0	P53_nolc_peak_1885
7	107168428	107168726	299	107168502	3.02	2.62991	2.60632	0	P53_nolc_peak_1886
7	107169888	107170177	290	107169927	3.02	2.71475	2.65584	0	P53_nolc_peak_1887
7	114176046	114176253	208	114176171	4.31	3.536	3.40417	0	P53_nolc_peak_1888
7	116810523	116810709	187	116810657	4.31	3.47147	3.36387	0	P53_nolc_peak_1889
7	117274027	117274311	285	117274158	7.77	6.82969	5.61501	1.83626	P53_nolc_peak_1890
7	117630632	117630839	208	117630724	4.75	3.71098	3.79592	0	P53_nolc_peak_1891
7	121505916	121506144	229	121506030	3.45	2.71475	2.94086	0	P53_nolc_peak_1892
7	121511194	121511419	226	121511320	8.63	6.98599	5.5079	1.94806	P53_nolc_peak_1893
7	121634496	121634734	239	121634632	3.88	2.71475	3.22588	0	P53_nolc_peak_1894
7	122765106	122765371	266	122765193	3.45	2.71475	2.94086	0	P53_nolc_peak_1895
7	128343861	128344057	197	128343954	6.04	4.48508	3.78425	0.0296994	P53_nolc_peak_1896
7	130373935	130374141	207	130374039	7.33	5.67201	4.61928	0.925403	P53_nolc_peak_1897
7	132256037	132256257	221	132256093	3.88	2.71475	3.22588	0	P53_nolc_peak_1898
7	134516065	134516405	341	134516206	9.49	9.43102	6.80191	4.04278	P53_nolc_peak_1899
7	134526608	134526799	192	134526699	8.2	5.54603	4.33384	0.83354	P53_nolc_peak_1900
7	135172072	135172368	297	135172265	4.75	3.71098	3.79592	0	P53_nolc_peak_1901
7	136142698	136142884	187	136142844	3.02	2.71475	2.65584	0	P53_nolc_peak_1902
7	136175757	136175943	187	136175917	3.88	2.71475	3.22588	0	P53_nolc_peak_1903
7	136757602	136757890	289	136757741	3.02	2.71475	2.65584	0	P53_nolc_peak_1904
7	137048951	137049184	234	137049082	3.88	2.57739	3.12781	0	P53_nolc_peak_1905
7	137393661	137394088	428	137393928	4.31	3.71098	3.5109	0	P53_nolc_peak_1906
7	138164761	138165050	290	138164898	8.63	6.8098	5.39252	1.82509	P53_nolc_peak_1907
7	138738831	138739039	209	138738933	9.06	5.49289	4.09143	0.786232	P53_nolc_peak_1908
7	139340668	139340955	288	139340752	5.61	2.35657	2.64747	0	P53_nolc_peak_1909
7	139708578	139708886	309	139708757	6.04	4.42671	3.74659	0	P53_nolc_peak_1910
7	140200182	140200449	268	140200312	11.22	8.0058	5.42241	2.80921	P53_nolc_peak_1911
7	141738119	141738391	273	141738260	8.2	6.1863	4.75267	1.26859	P53_nolc_peak_1912
7	143416044	143416230	187	143416124	5.61	2.89877	3.06014	0	P53_nolc_peak_1913
7	148339131	148339318	188	148339275	4.75	3.71098	3.79592	0	P53_nolc_peak_1914
7	148402155	148402521	367	148402374	10.35	9.88615	6.86212	4.41955	P53_nolc_peak_1915
7	148963223	148963529	307	148963269	5.18	2.4359	2.53153	0	P53_nolc_peak_1916
7	149691169	149691431	263	149691298	11.65	7.6679	5.39019	2.51107	P53_nolc_peak_1917
7	150944103	150944359	257	150944240	9.92	6.50084	5.14702	1.55104	P53_nolc_peak_1918
7	151688139	151688348	210	151688231	7.77	5.90182	5.01432	1.05432	P53_nolc_peak_1919
7	152382652	152382965	314	152382782	5.18	3.16325	3.04495	0	P53_nolc_peak_1920
7	155224797	155225061	265	155224934	3.02	2.71475	2.65584	0	P53_nolc_peak_1921
7	155481906	155482816	911	155482390	50.04	63.7607	23.8433	54.5706	P53_nolc_peak_1922
7	155770672	155770873	202	155770774	4.31	3.67246	3.48773	0	P53_nolc_peak_1923
7	157718393	157718647	255	157718547	6.04	5.92283	4.65098	1.05432	P53_nolc_peak_1924
7	158147470	158148004	535	158147638	12.08	6.6833	4.35964	1.71044	P53_nolc_peak_1925
7	158148236	158148598	363	158148385	15.53	6.9063	4.13251	1.90475	P53_nolc_peak_1926
7	158148916	158149154	239	158149020	8.63	5.94877	4.8139	1.05594	P53_nolc_peak_1927
7	158165080	158165266	187	158165168	4.31	3.29088	3.2485	0	P53_nolc_peak_1928
7	158818576	158819114	539	158818931	11.22	9.50226	6.37486	4.10889	P53_nolc_peak_1929
8	7767212	7767418	207	7767309	4.31	3.71098	3.5109	0	P53_nolc_peak_1930
[truncated: 329 more rows]
