# Supplementary figures and images for: NOLC1 suppresses immunochemotherapy by inhibiting p53-mediated ferroptosis in gastric cancer
Source: eLife journal article supplement (doi:10.7554/elife.103904), 2024-12-24

Fig.1E

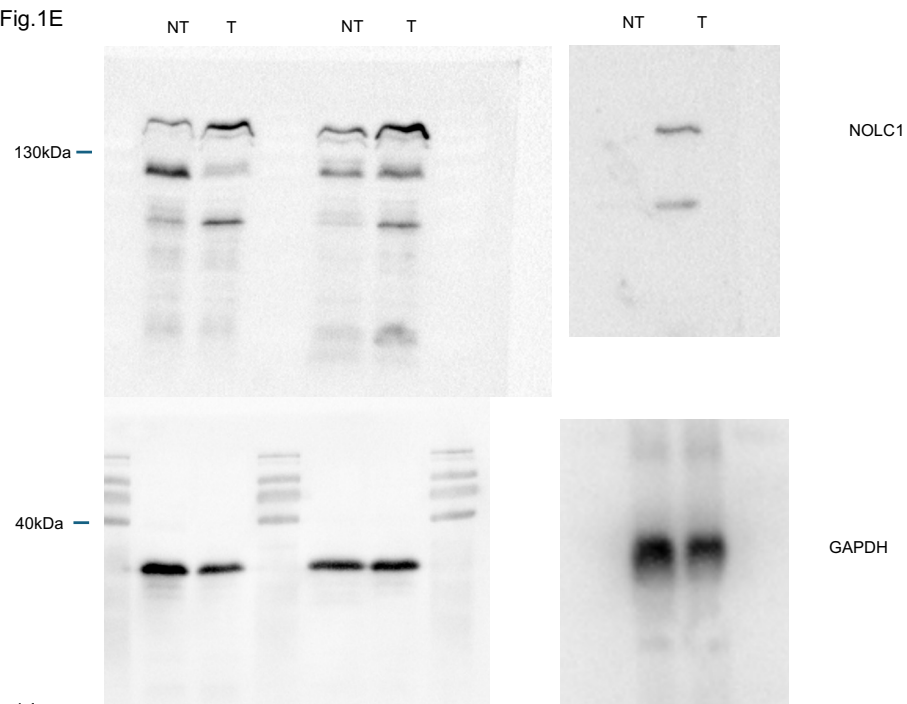

Fig.1J

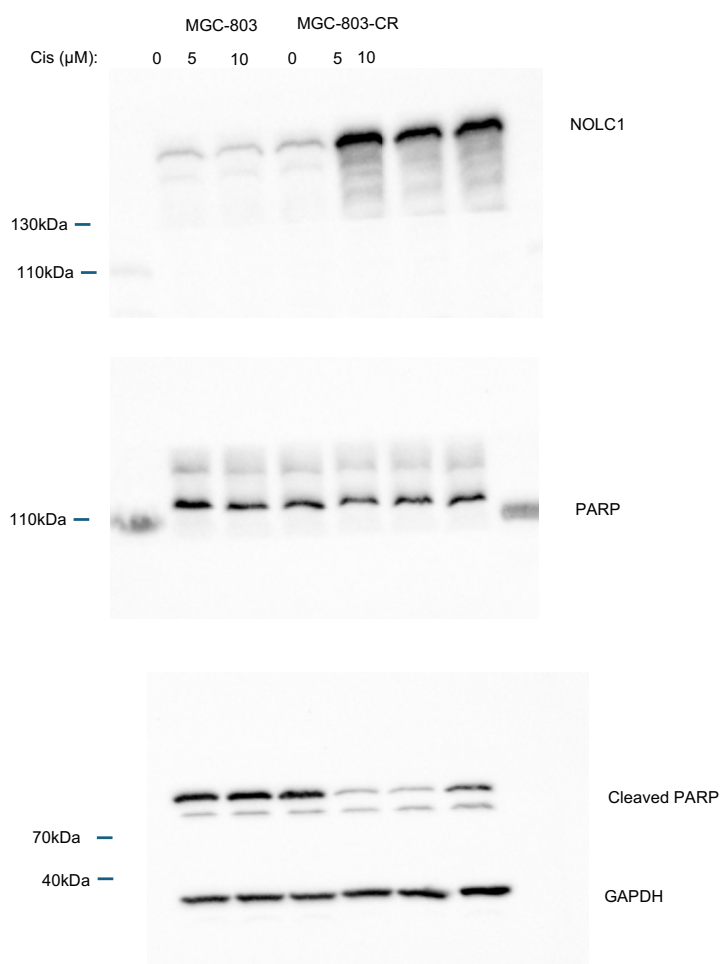

Supplement: fig1-data1 [file elife-103904-fig1-data1-v1.zip]

Fig.5A

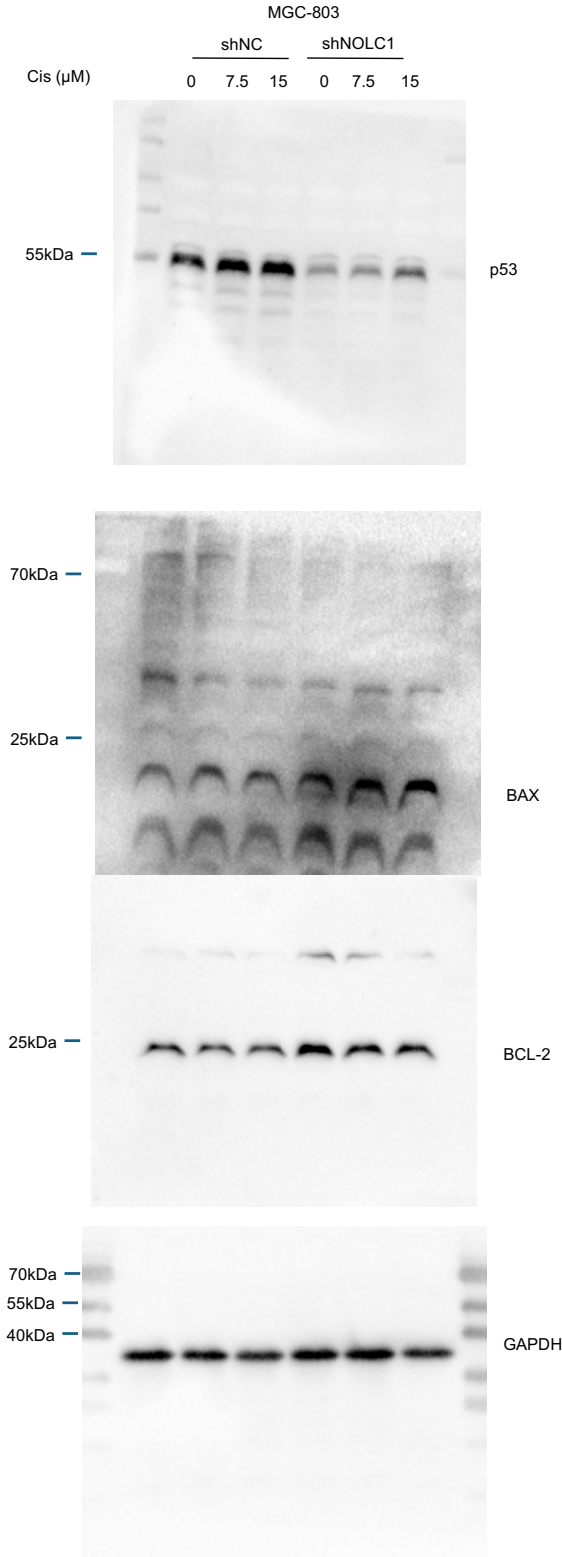

Fig.5G

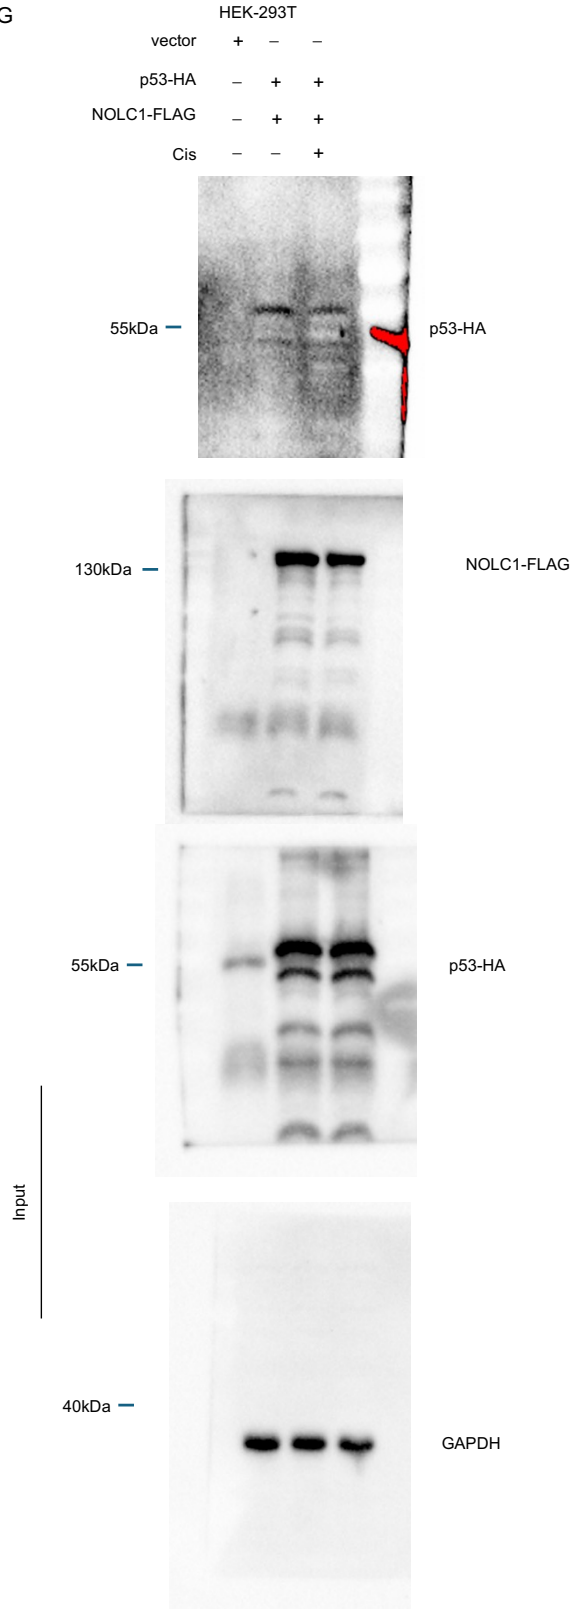

Fig.5I

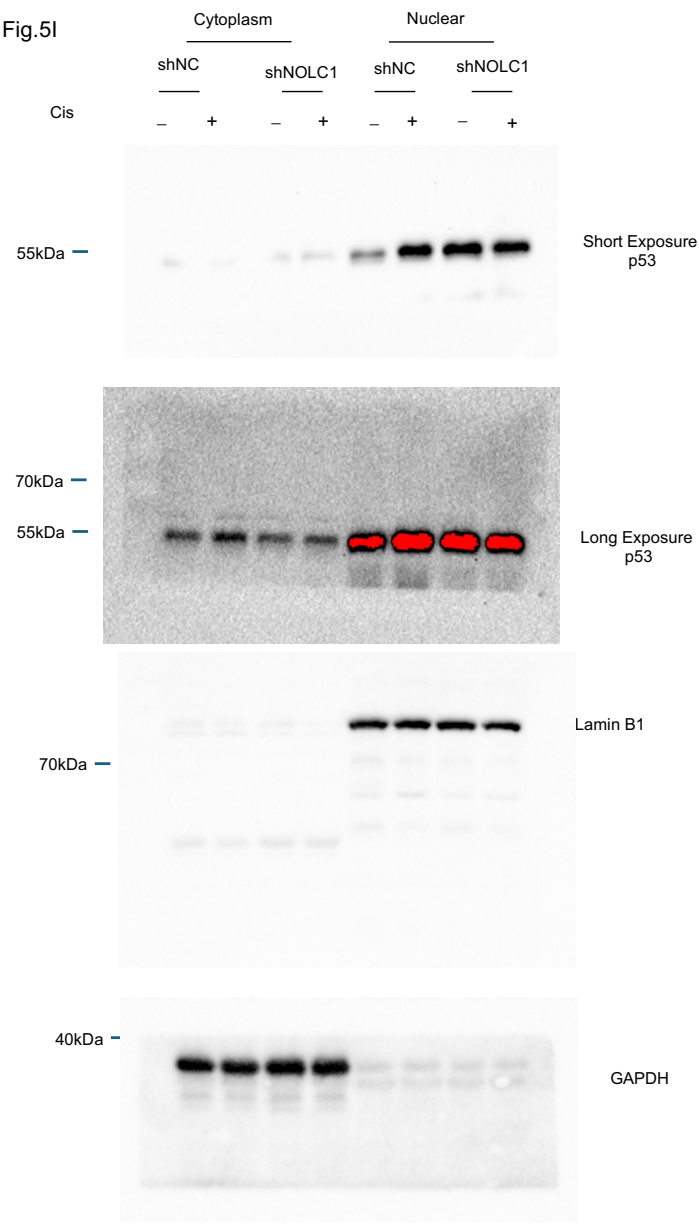

Fig.5K

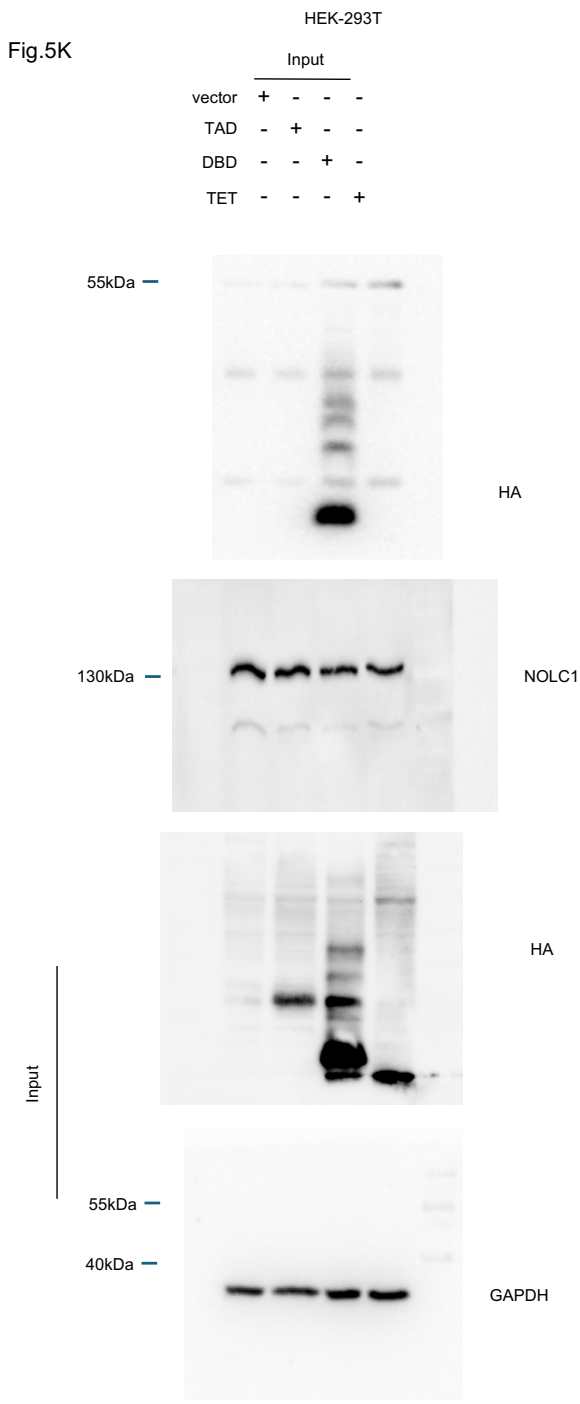

Fig.5L

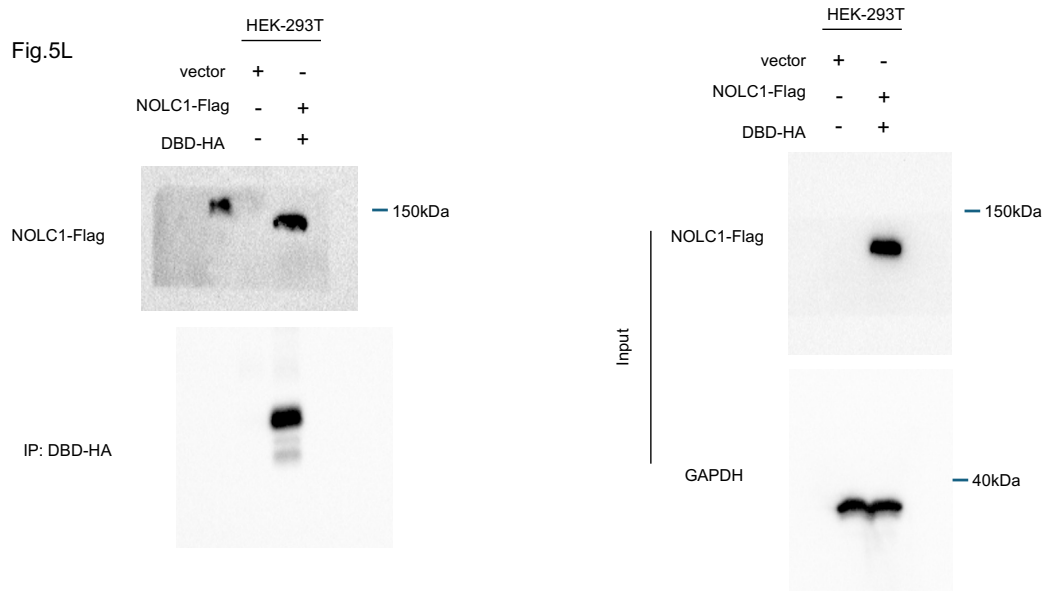

Supplement: fig5-data1 [file elife-103904-fig5-data1-v1.zip]
